# Supplementary material for: Accessing Perfluoroaryl Sulfonimidamides and Sulfoximines via Photogenerated Perfluoroaryl Nitrenes: Synthesis and Application as a Chiral Auxiliary
Source: PubMed Central journal article supplement (PMC8650101; doi:10.1021/acs.joc.1c02241), 2021-11-12

# Supporting information

## Accessing Perfluoroaryl Sulfonimidamides and Sulfoximines via Photogenerated Perfluoroaryl Nitrenes: Synthesis and Application as a Chiral Auxiliary

Giampiero Proietti,<sup>‡</sup> Julius Kuzmin,<sup>‡</sup> Azamat Z. Temerdashev<sup>†</sup> and Peter Dinér<sup>\*‡</sup>

<sup>‡</sup> Division of Organic Chemistry, Department of Chemistry, KTH-Royal Institute of Technology, Teknikringen 30, 10044 Stockholm (Sweden)

E-mail: [diner@kth.se](mailto:diner@kth.se)

<sup>†</sup> Department of Analytical Chemistry, Kuban State University, Stavropolskaya St. 149, 350040 Krasnodar (Russia)

### Table of contents

|                                                                         |         |
|-------------------------------------------------------------------------|---------|
| NMR Spectra synthesized starting material                               | S2-S7   |
| NMR Spectra isolated products                                           | S8-S39  |
| NMR spectra and HPLC chromatograms for the Grignard additions screening | S39-S43 |
| HRMS spectra                                                            | S44-S64 |

# NMR Spectra synthesized starting material

## Compound 1a

$^1\text{H}$  NMR ( $\text{CDCl}_3$ , 400 MHz) **1a**

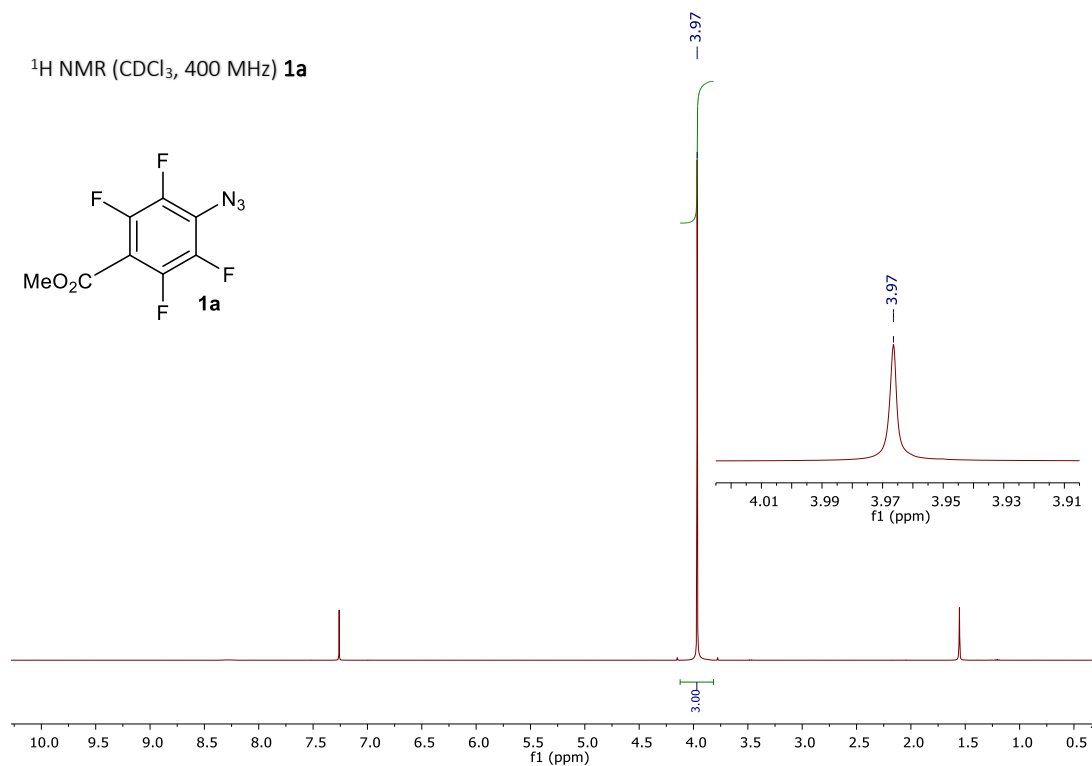

$^{13}\text{C}\{^1\text{H}\}$  NMR ( $\text{CDCl}_3$ , 100 MHz) **1a**

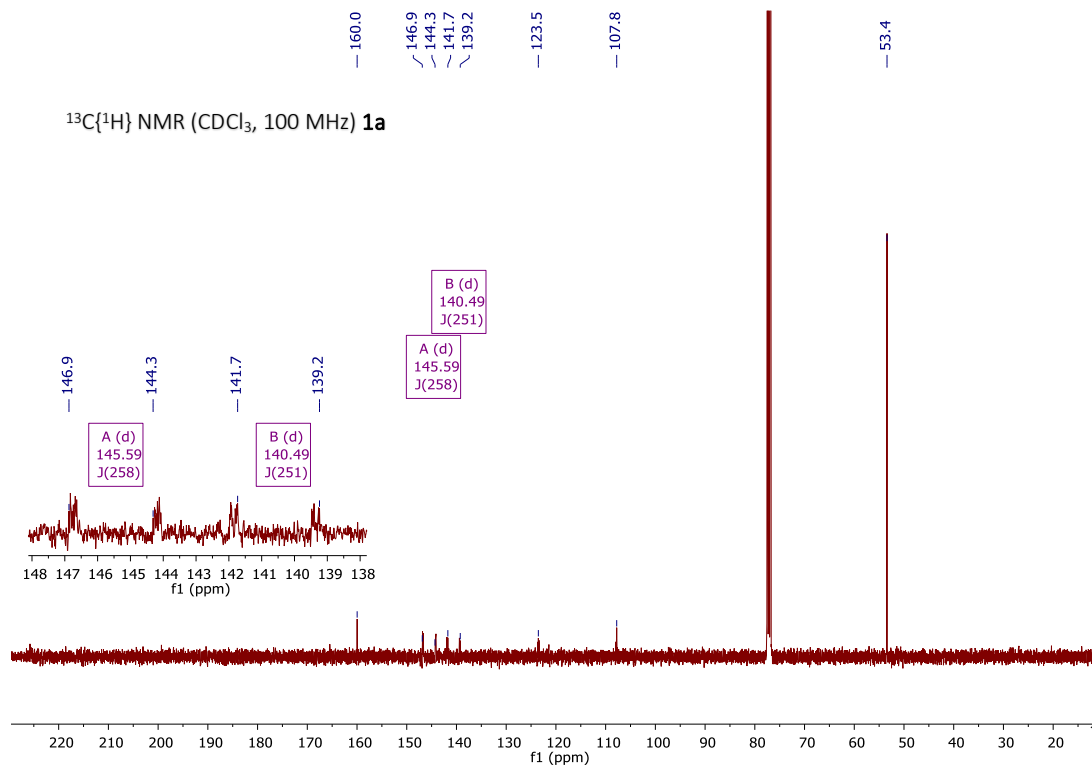

$^{19}\text{F}$  NMR ( $\text{CDCl}_3$ , 376 MHz) **1a**

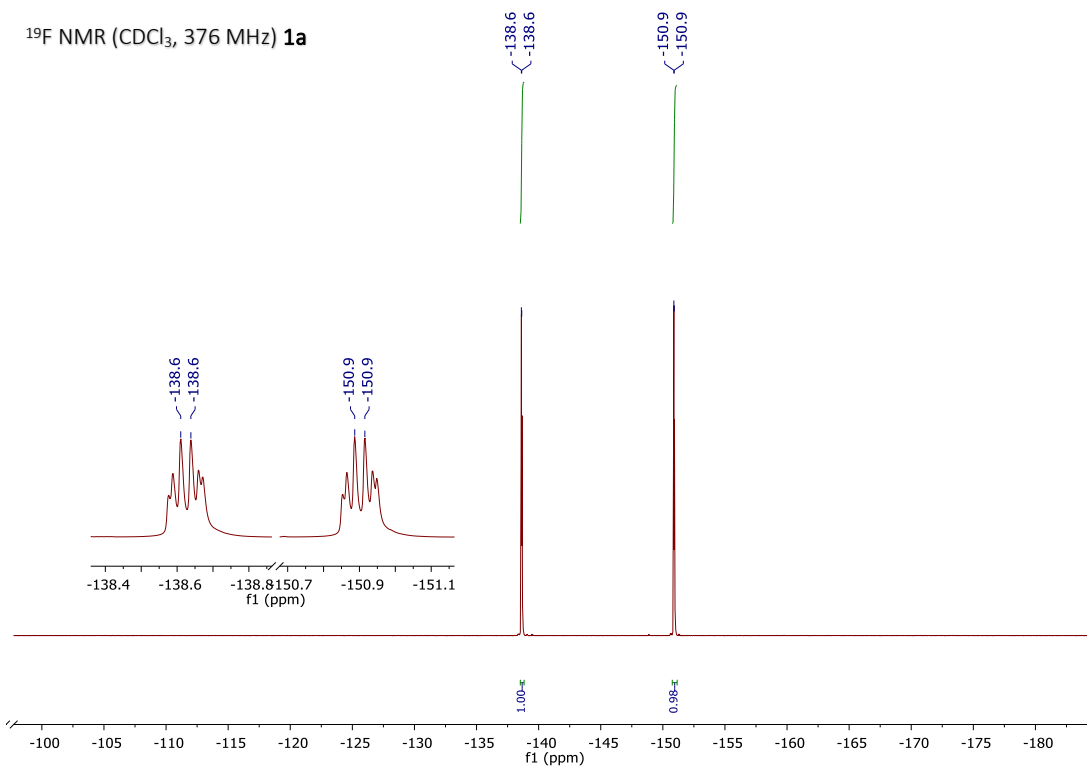

Compound **1b**

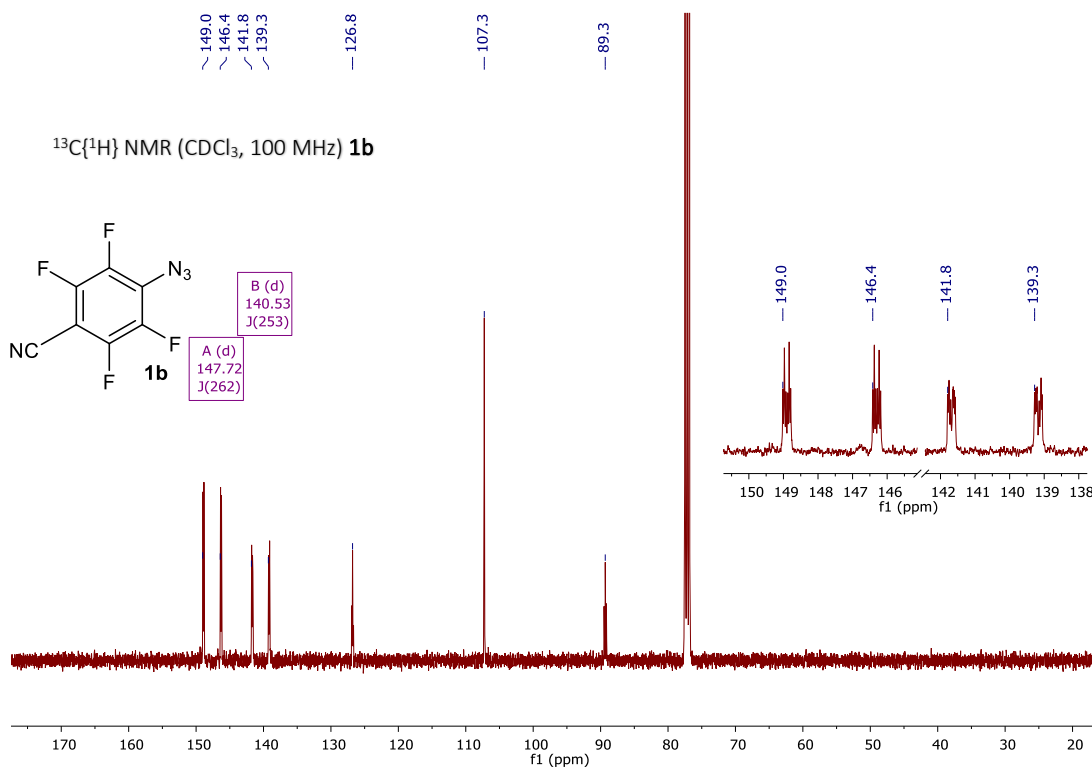

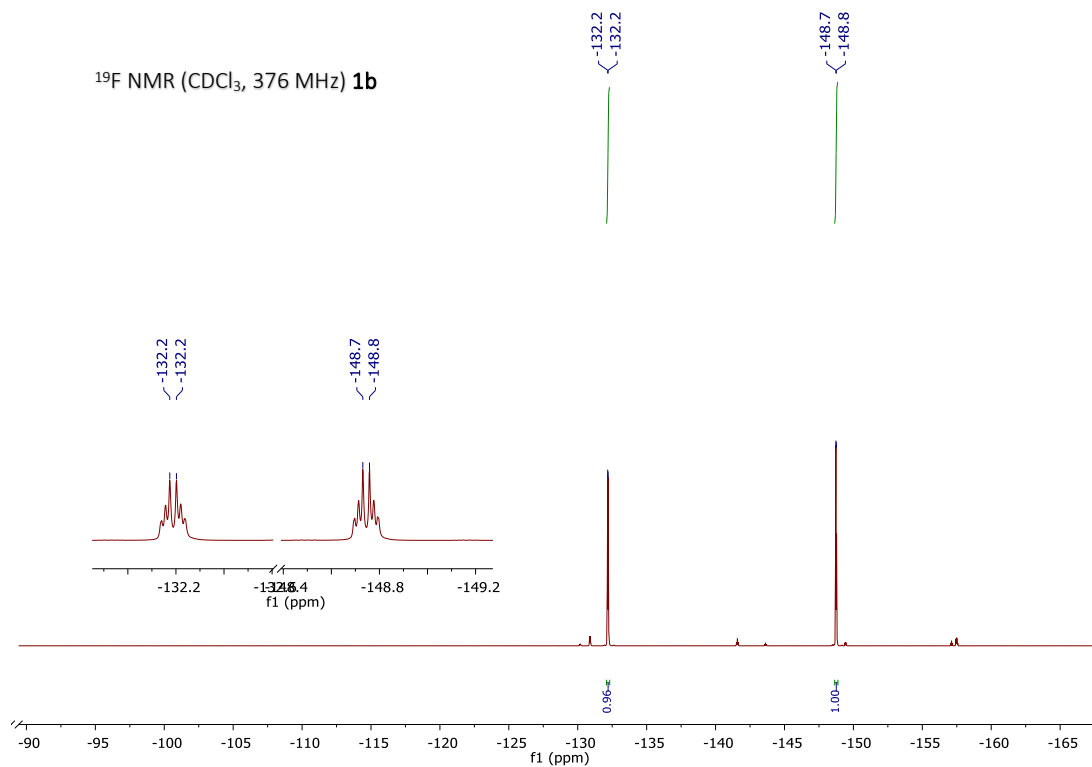

Compound **1c**

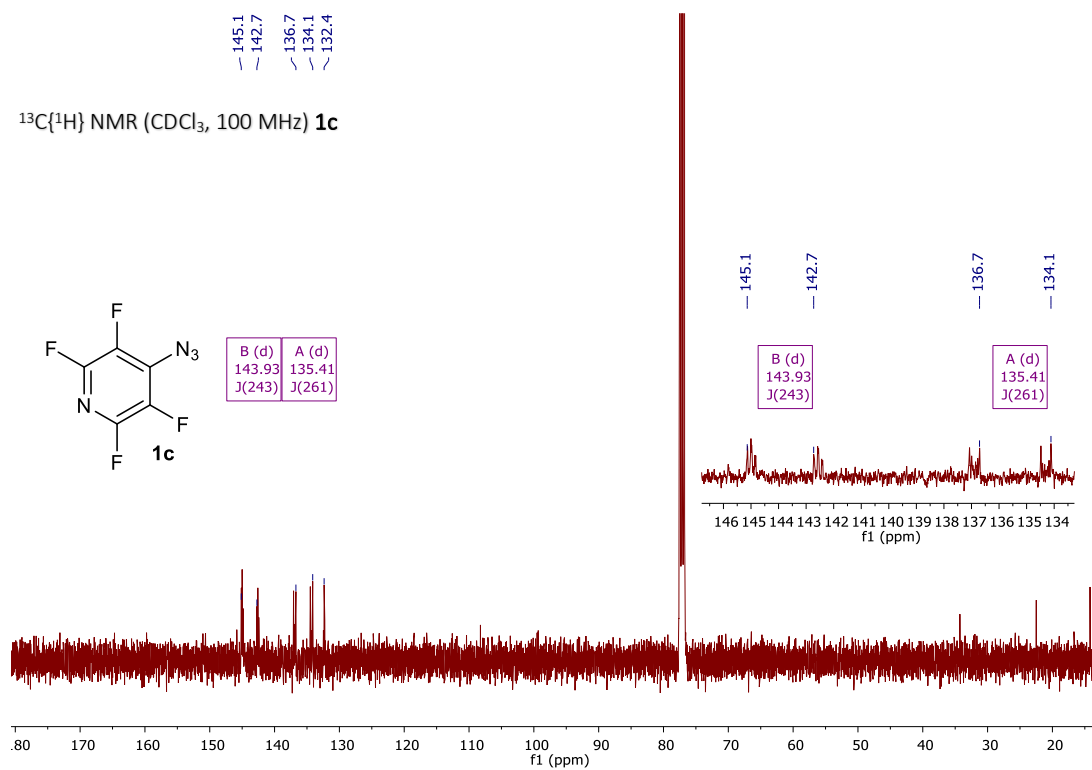

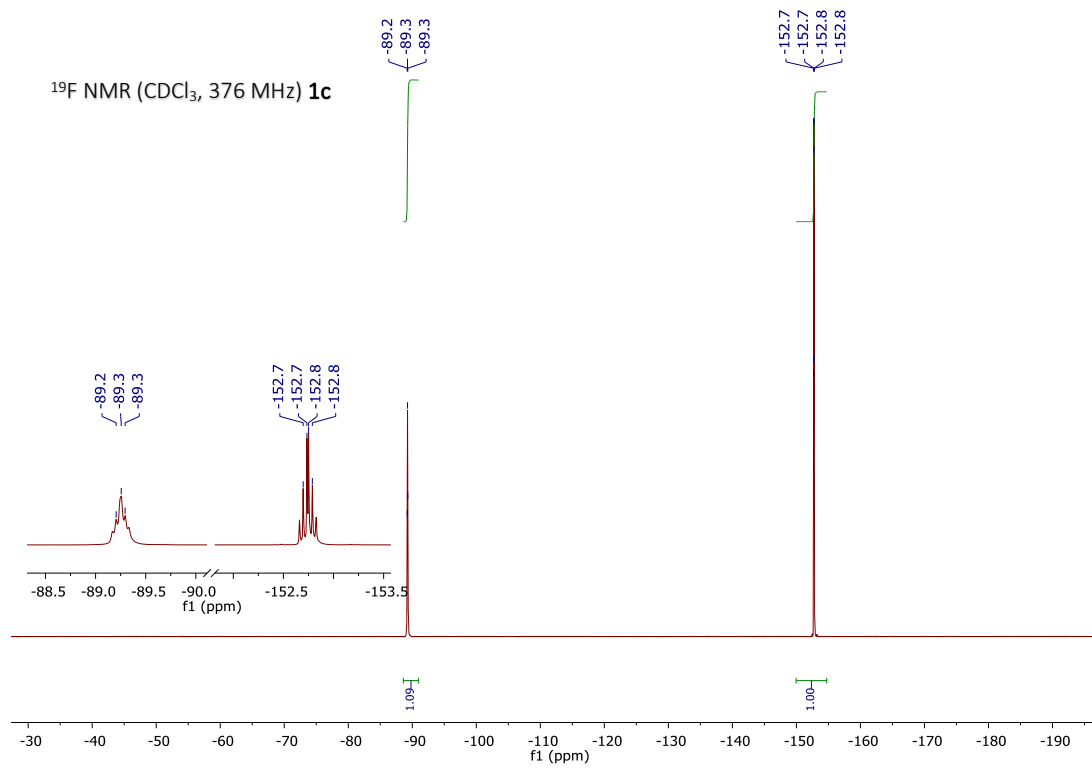

Compound **1d**

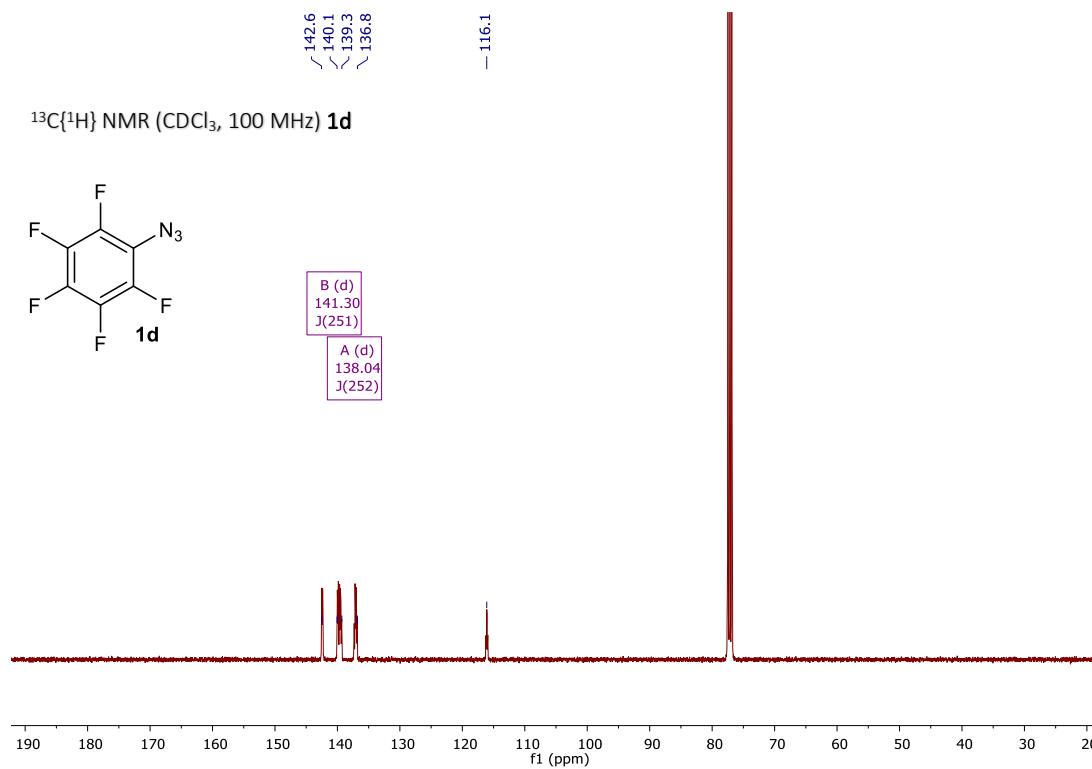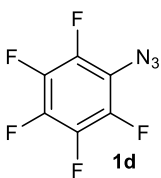

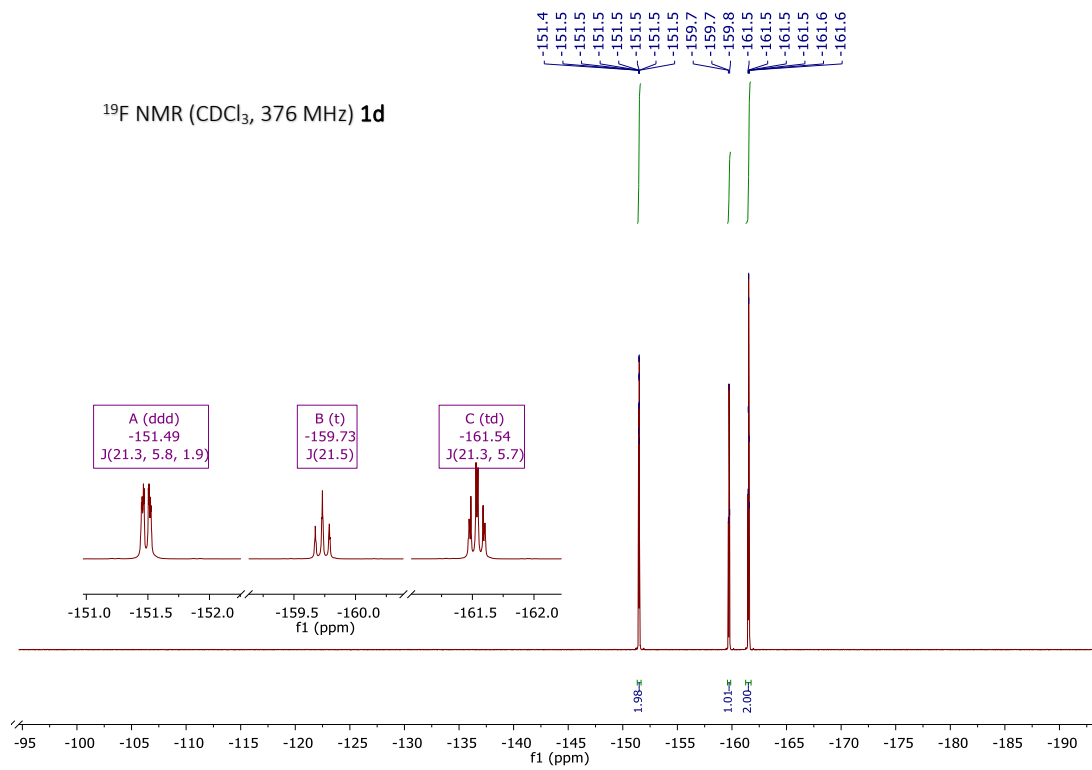

Compound **1e**

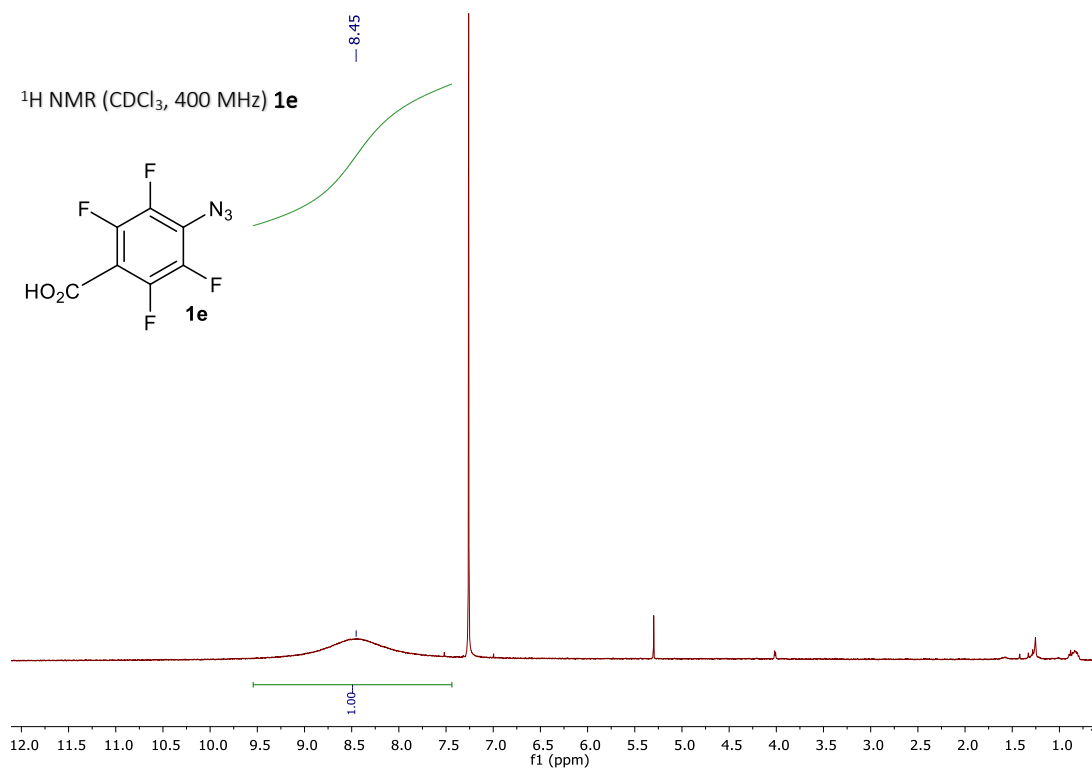

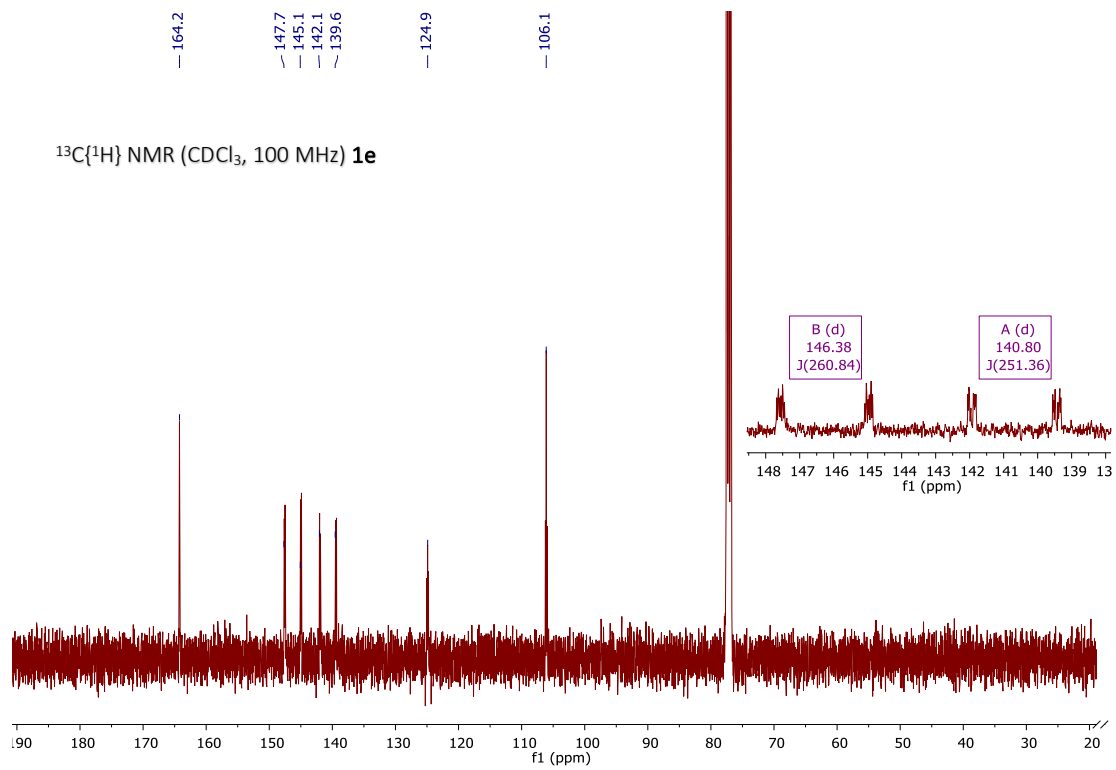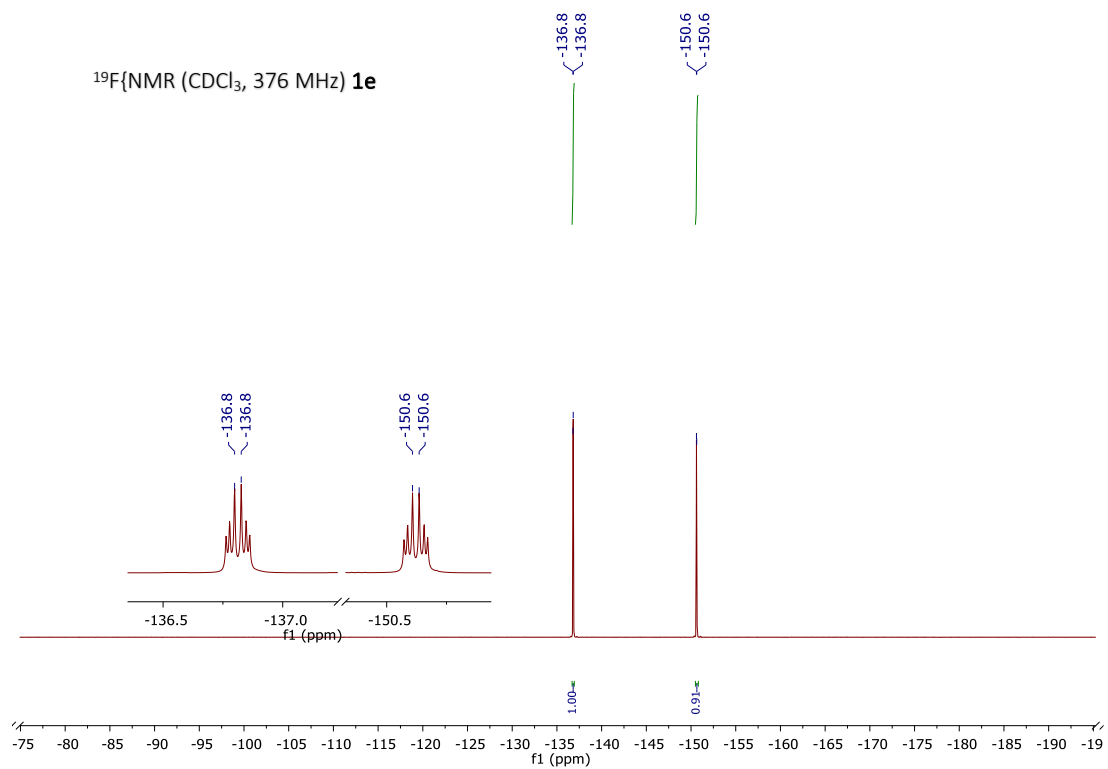

# 1. NMR Spectra isolated products

## Compound (S)-1

$^1\text{H}$ NMR ( $\text{CDCl}_3$ , 400 MHz) (S)-1

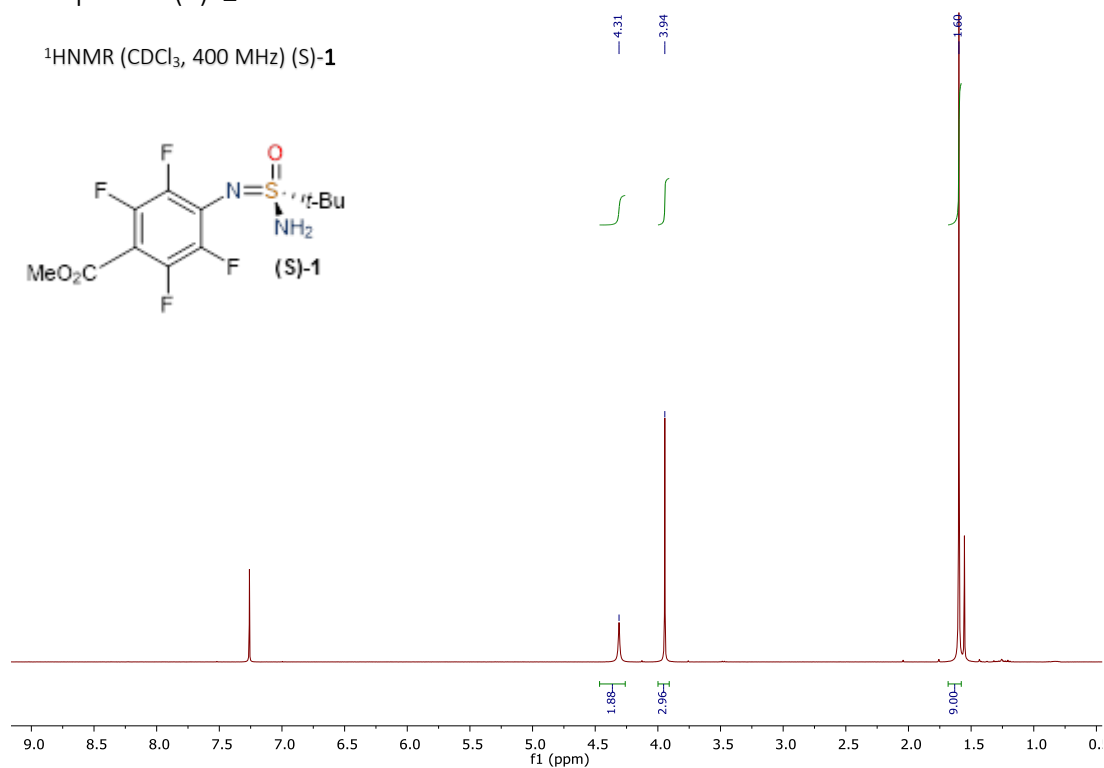

$^{13}\text{C}\{^1\text{H}\}$  NMR ( $\text{CDCl}_3$ , 100 MHz) (S)-1

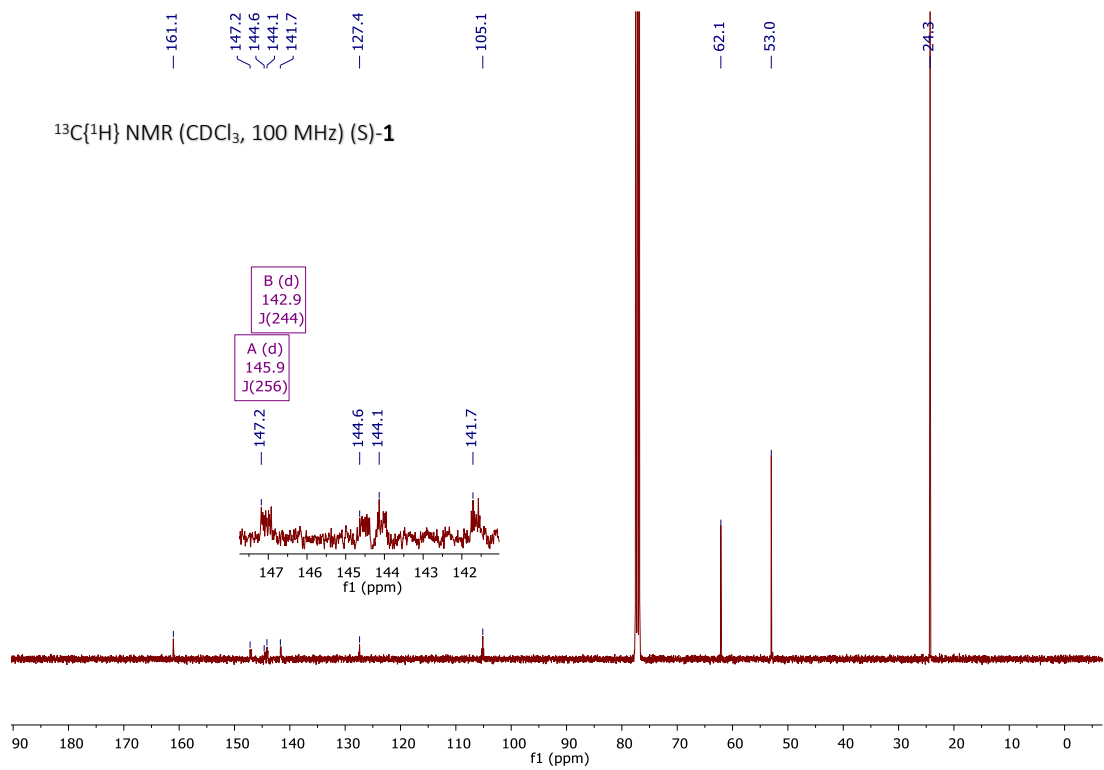



$^{19}\text{F}$  NMR ( $\text{CDCl}_3$ , 376 MHz) (S)-1

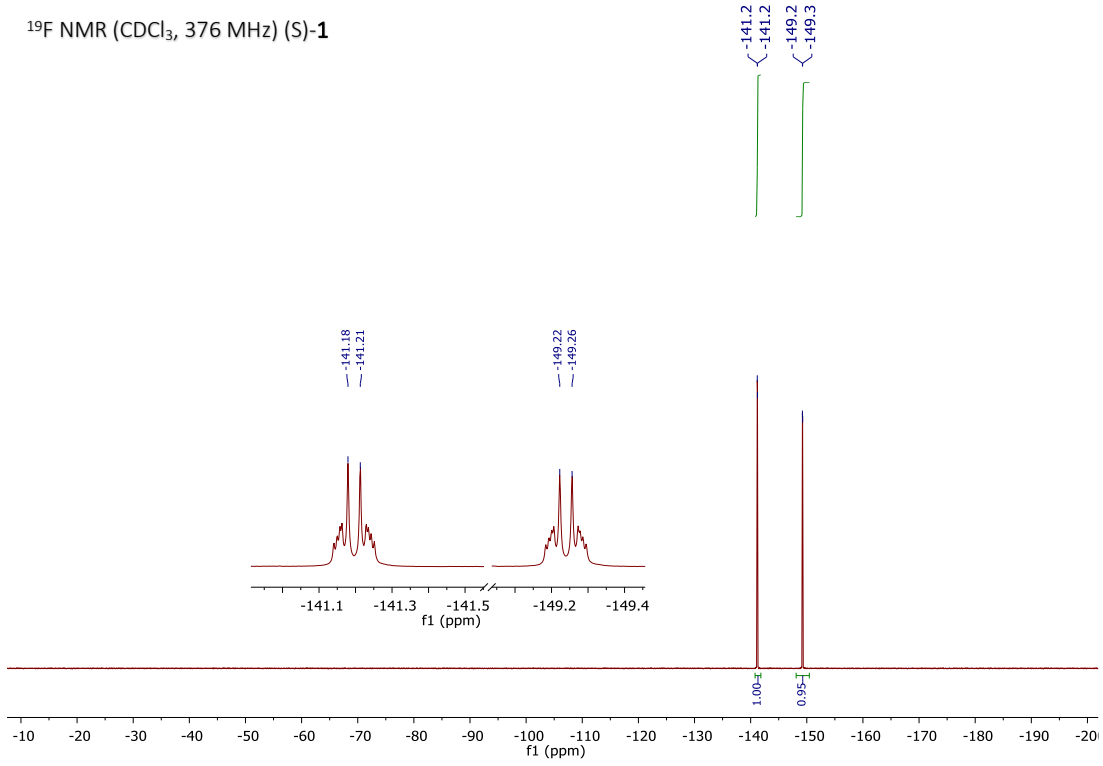

Compound (R)-1

$^1\text{H}$  NMR ( $\text{CDCl}_3$ , 400 MHz) (R)-1

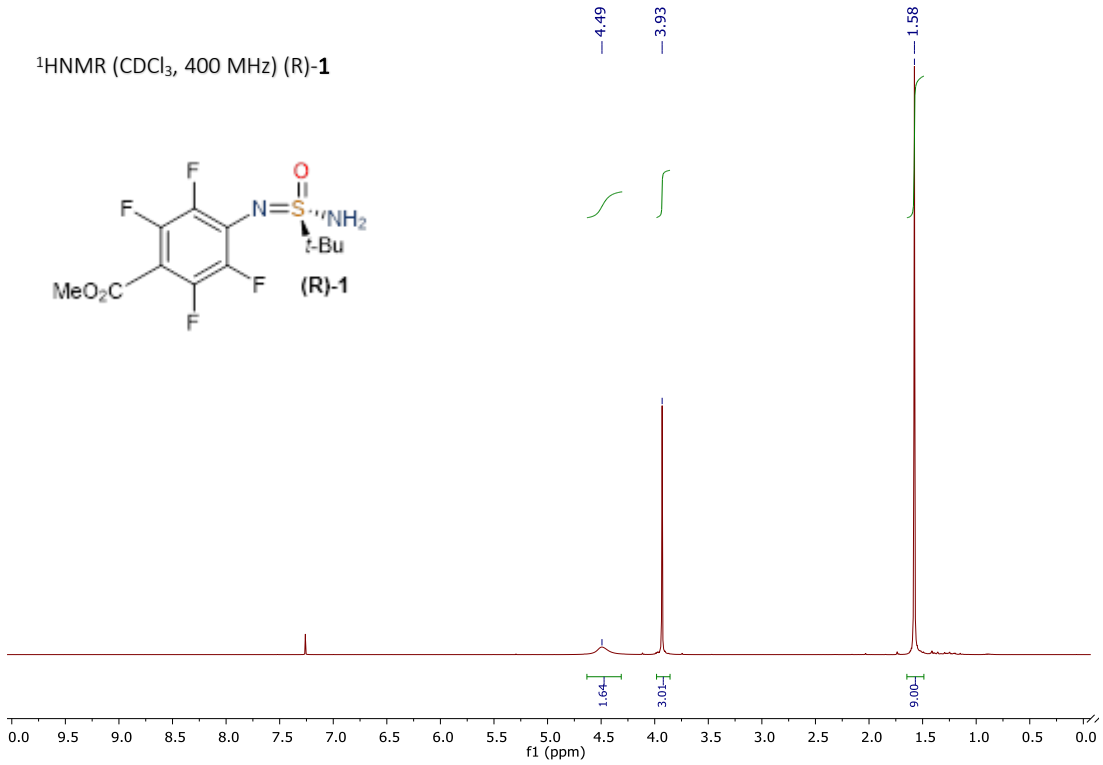

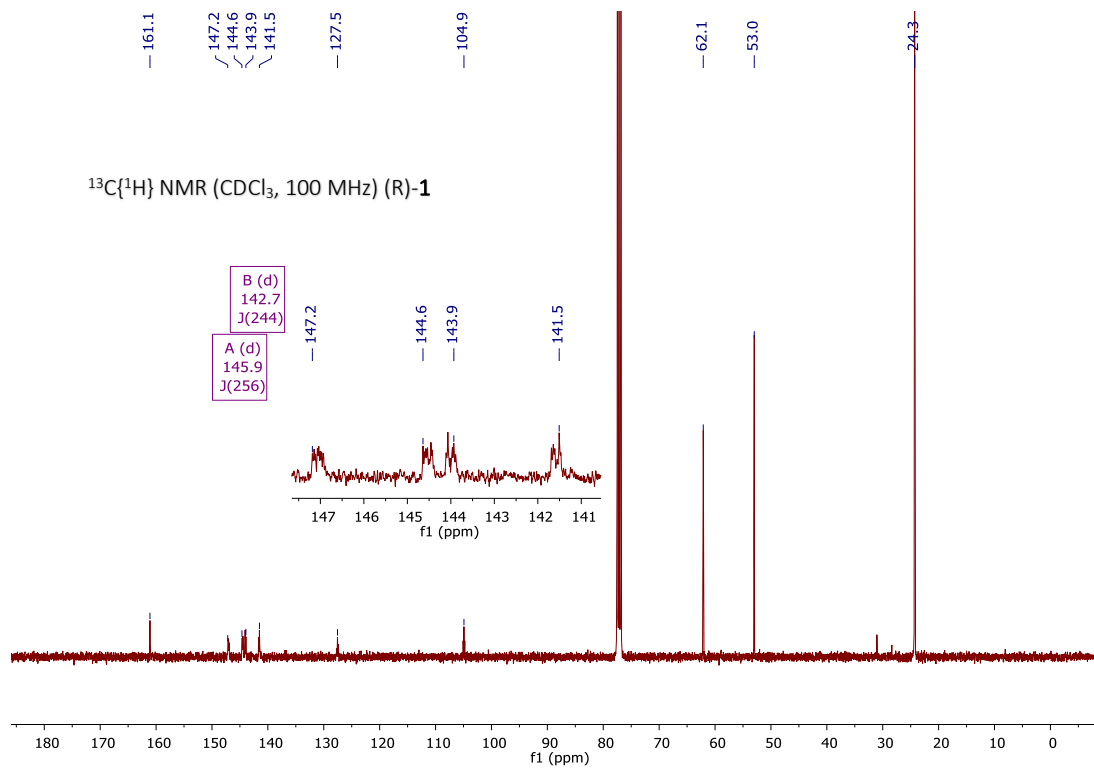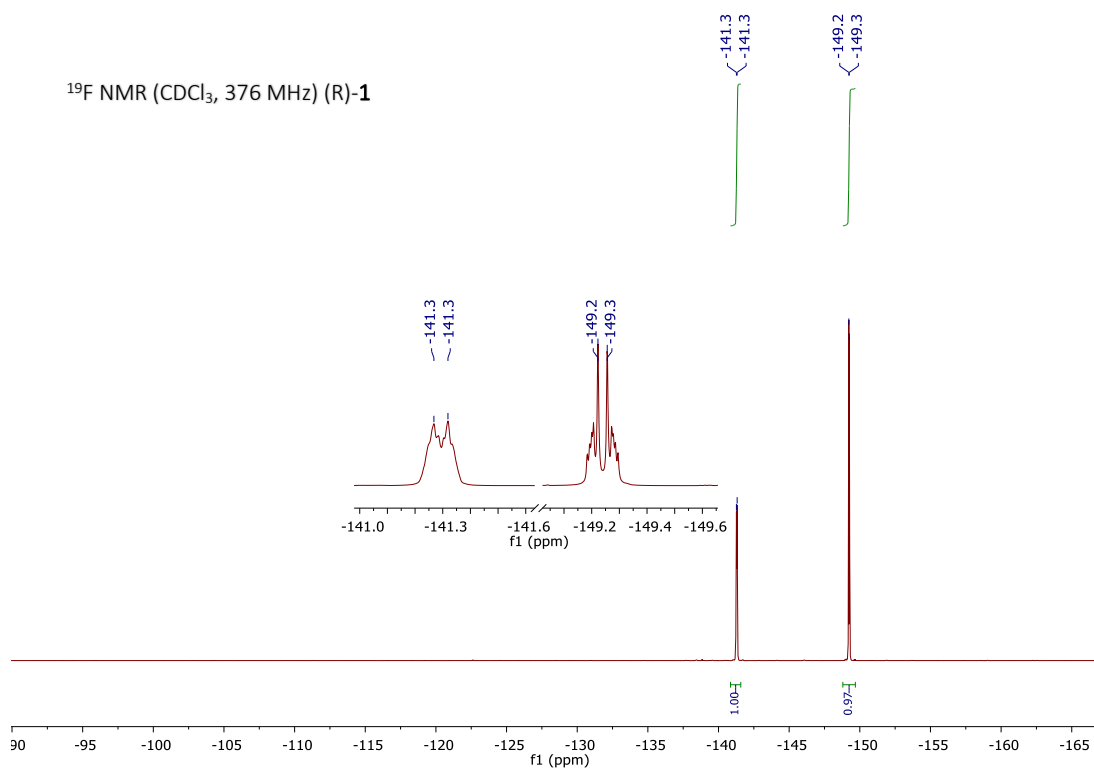

# Compound (S)-2

$^1\text{H}$  NMR ( $\text{CDCl}_3$ , 400 MHz) (S)-2

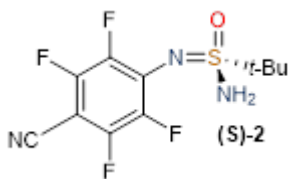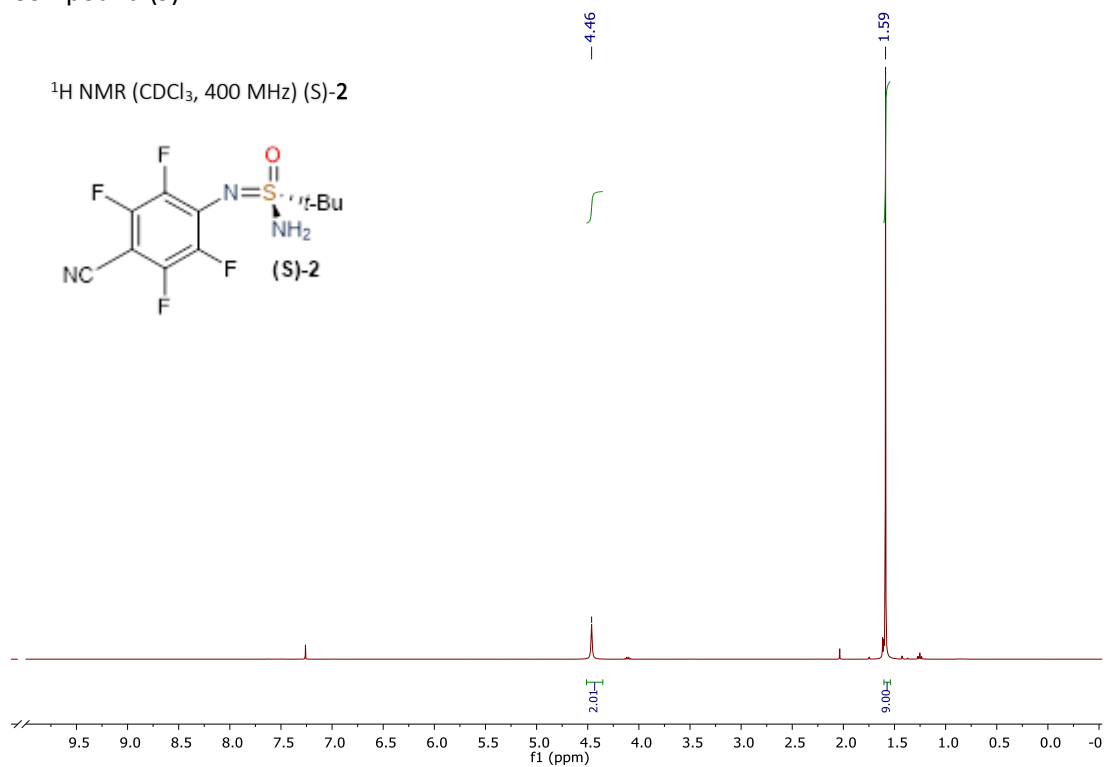

$^{13}\text{C}\{^1\text{H}\}$  NMR ( $\text{CDCl}_3$ , 125 MHz) (S)-2

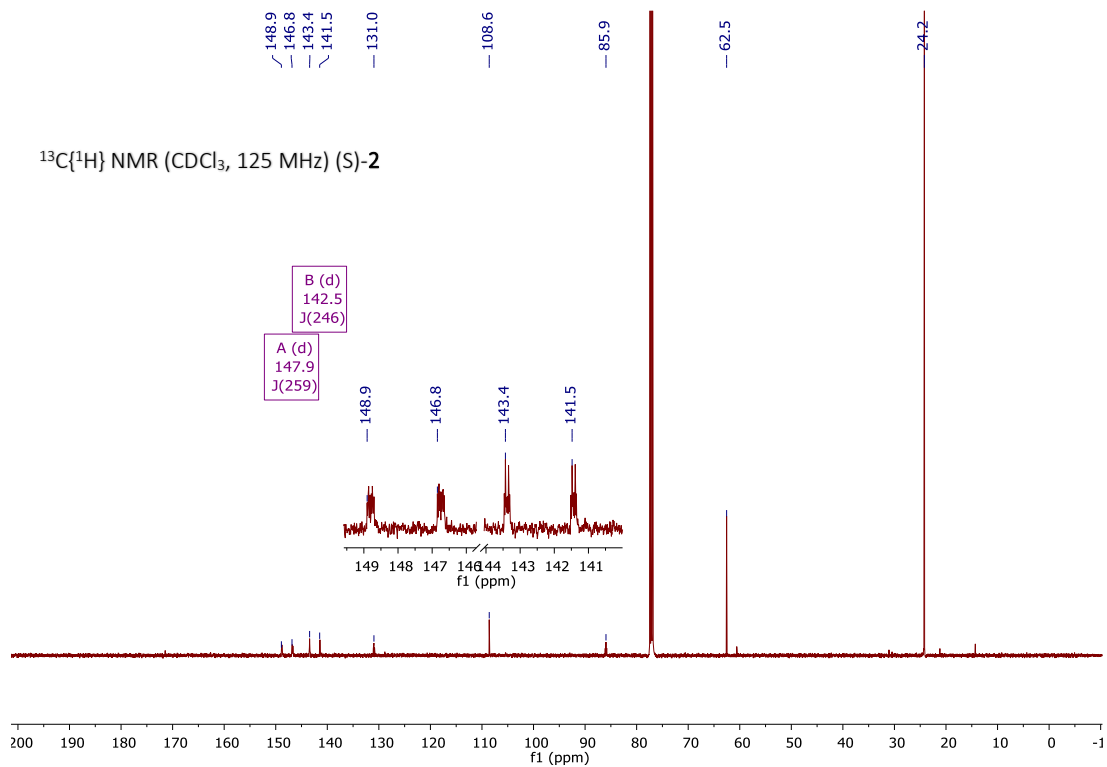

$^{19}\text{F}$  NMR ( $\text{CDCl}_3$ , 376 MHz) (S)-2

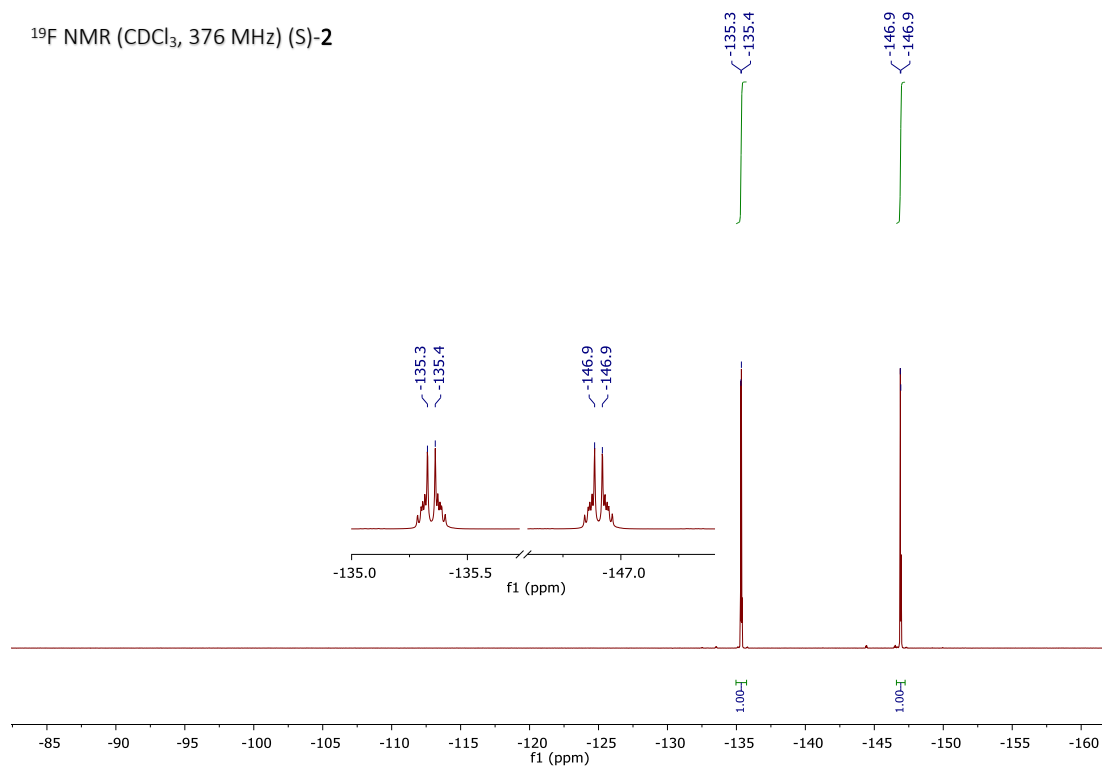

Compound (S)-3

$^1\text{H}$  NMR ( $\text{CDCl}_3$ , 400 MHz) (S)-3

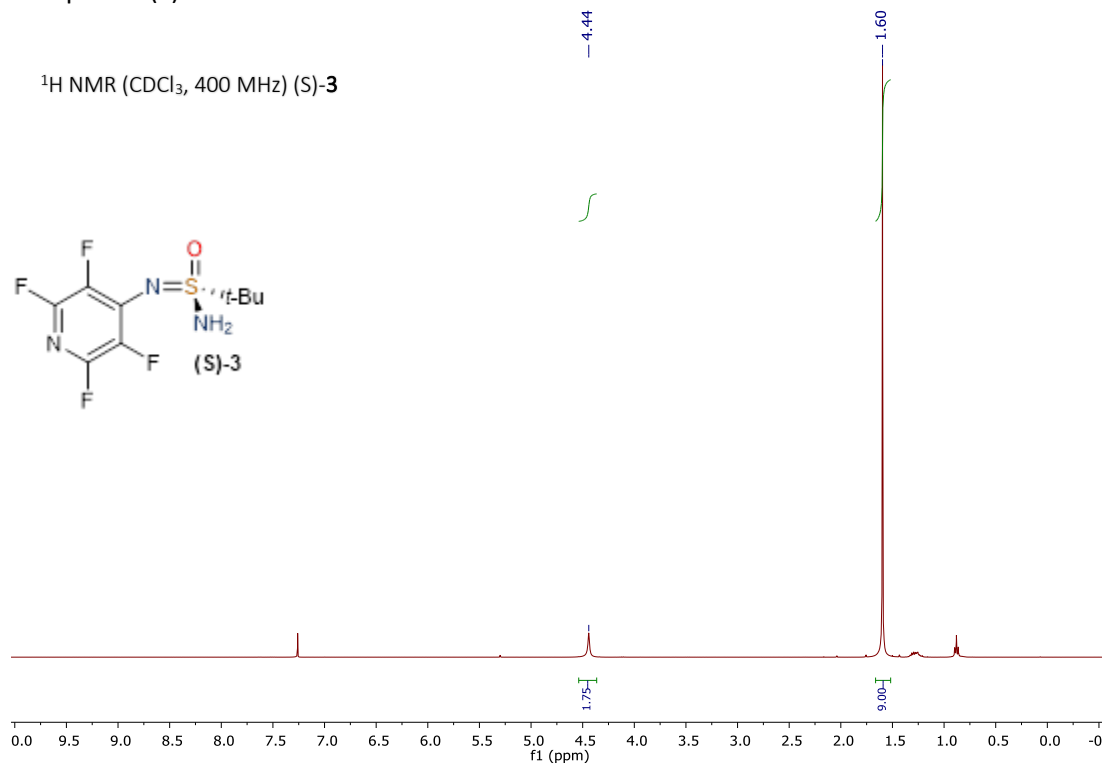

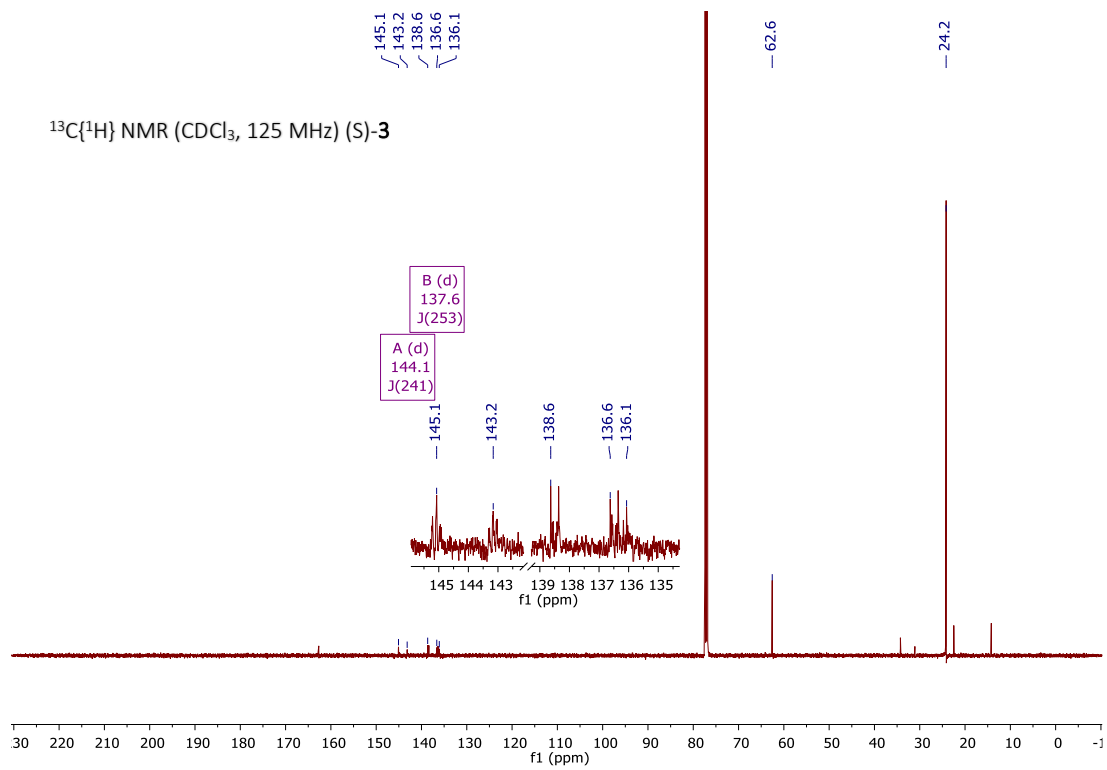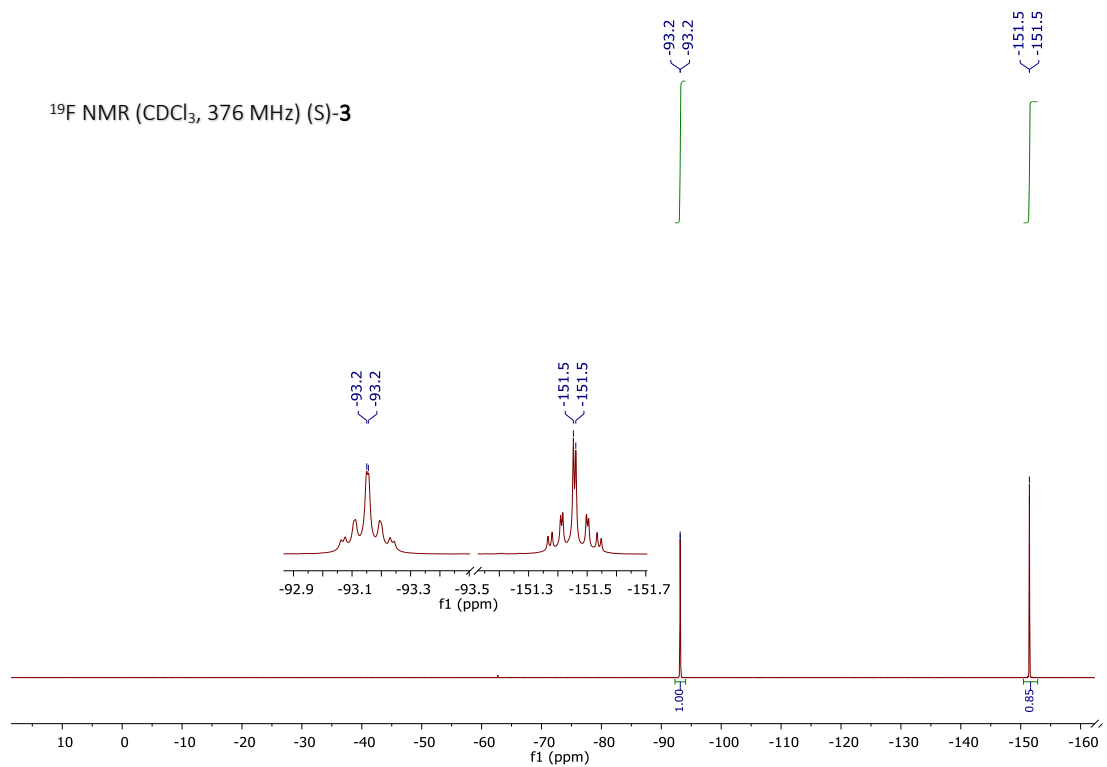

Compound (R)-3

$^1\text{H}$  NMR ( $\text{CDCl}_3$ , 400 MHz) (R)-3

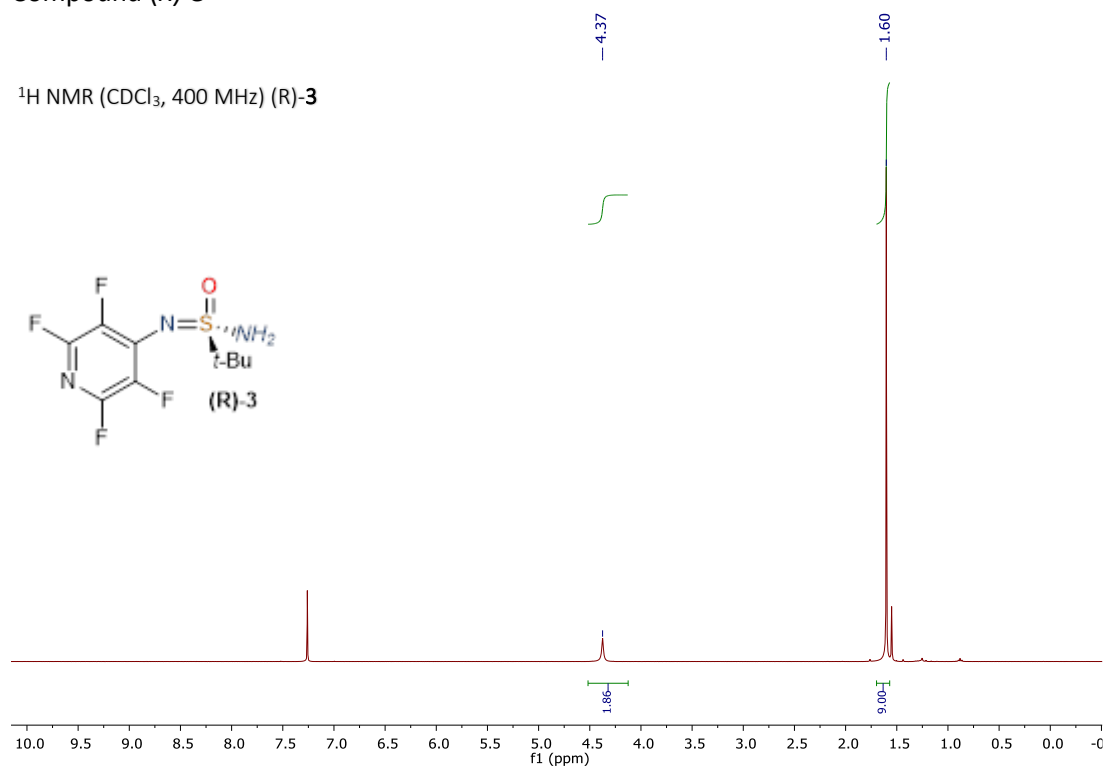

$^{13}\text{C}\{^1\text{H}\}$  NMR ( $\text{CDCl}_3$ , 100 MHz) (R)-3

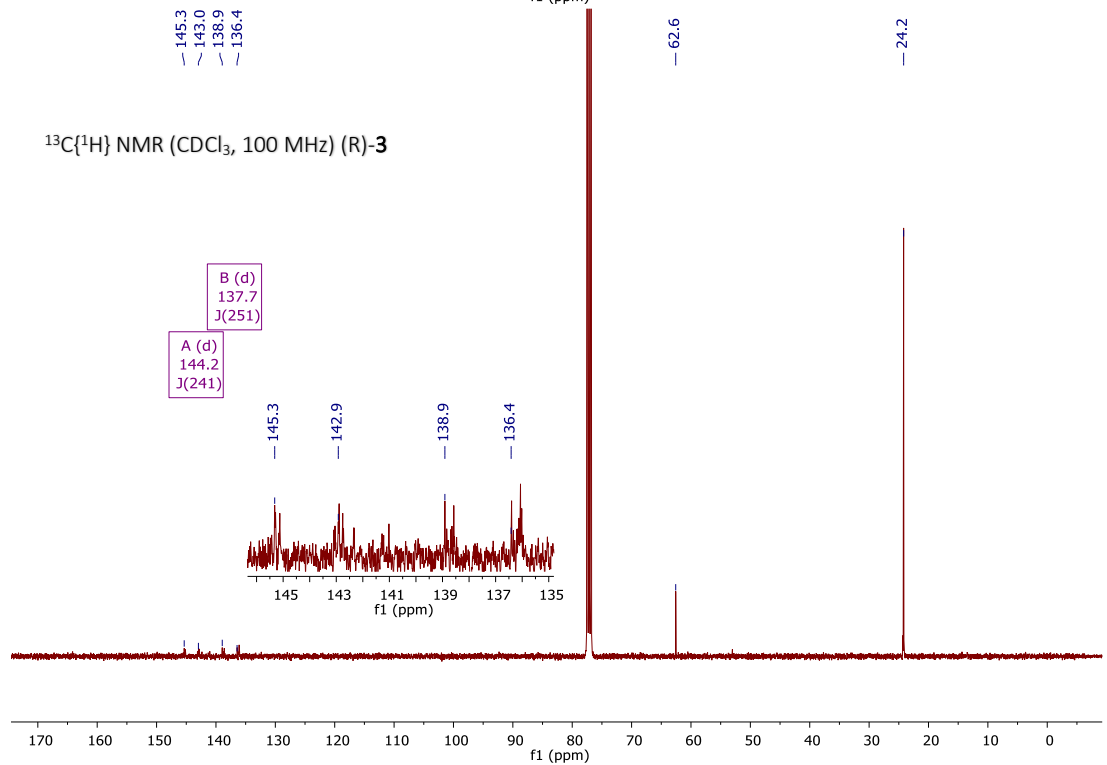

$^{19}\text{F}$  NMR ( $\text{CDCl}_3$ , 376 MHz) (R)-3

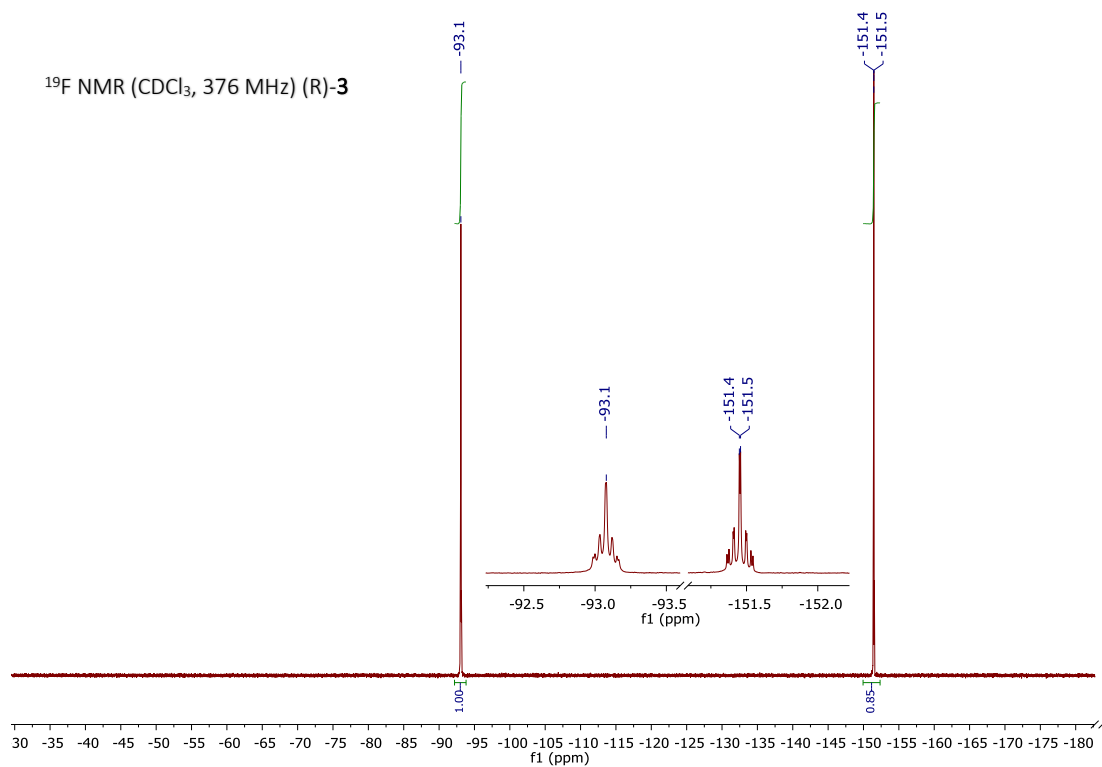

Compound (S)-4

$^1\text{H}$  NMR ( $\text{CDCl}_3$ , 400 MHz) (S)-4

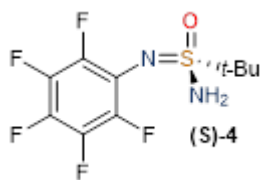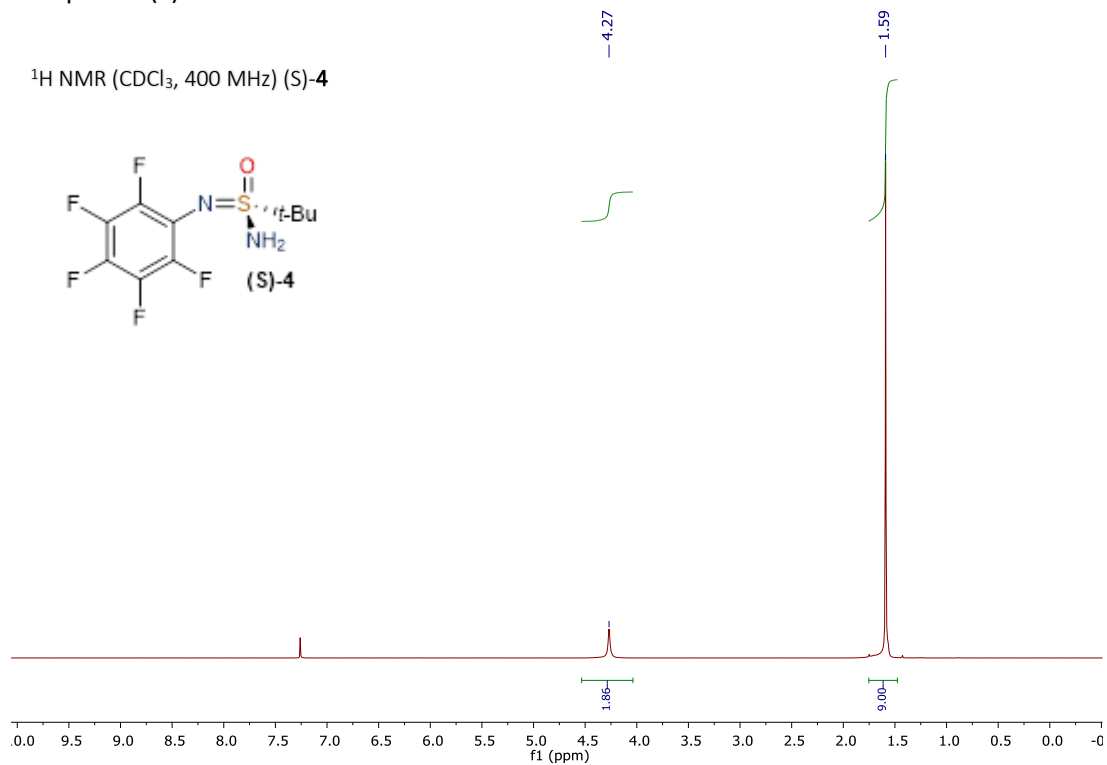

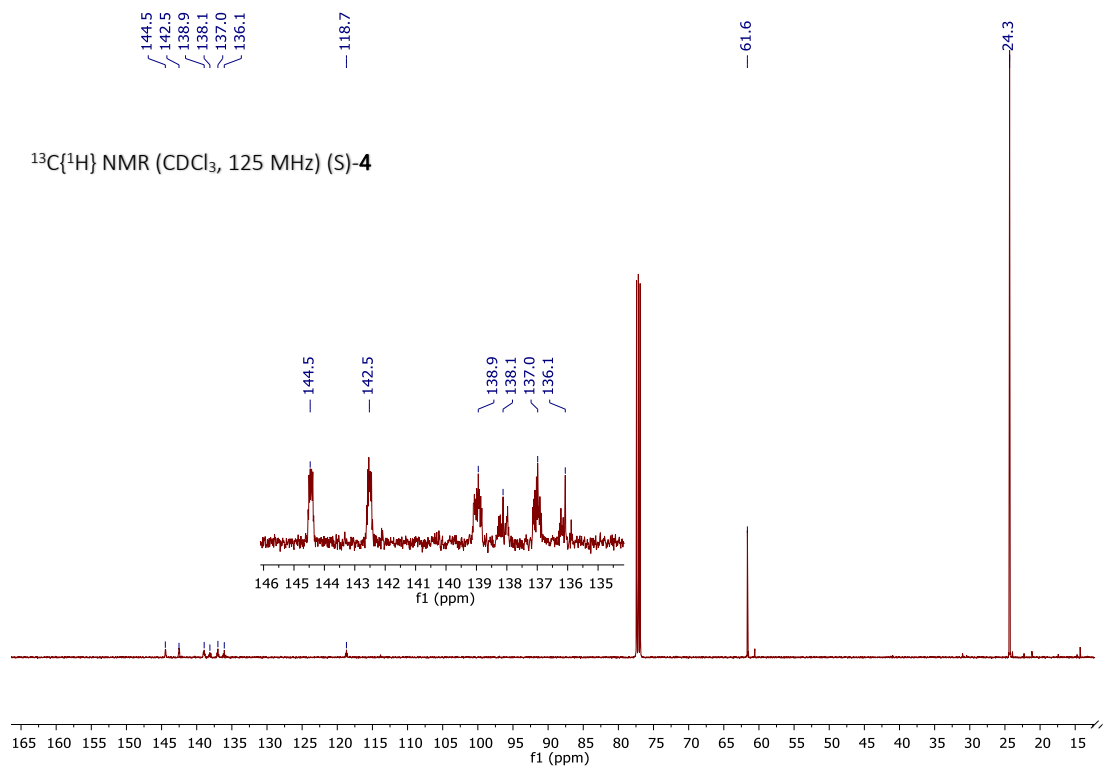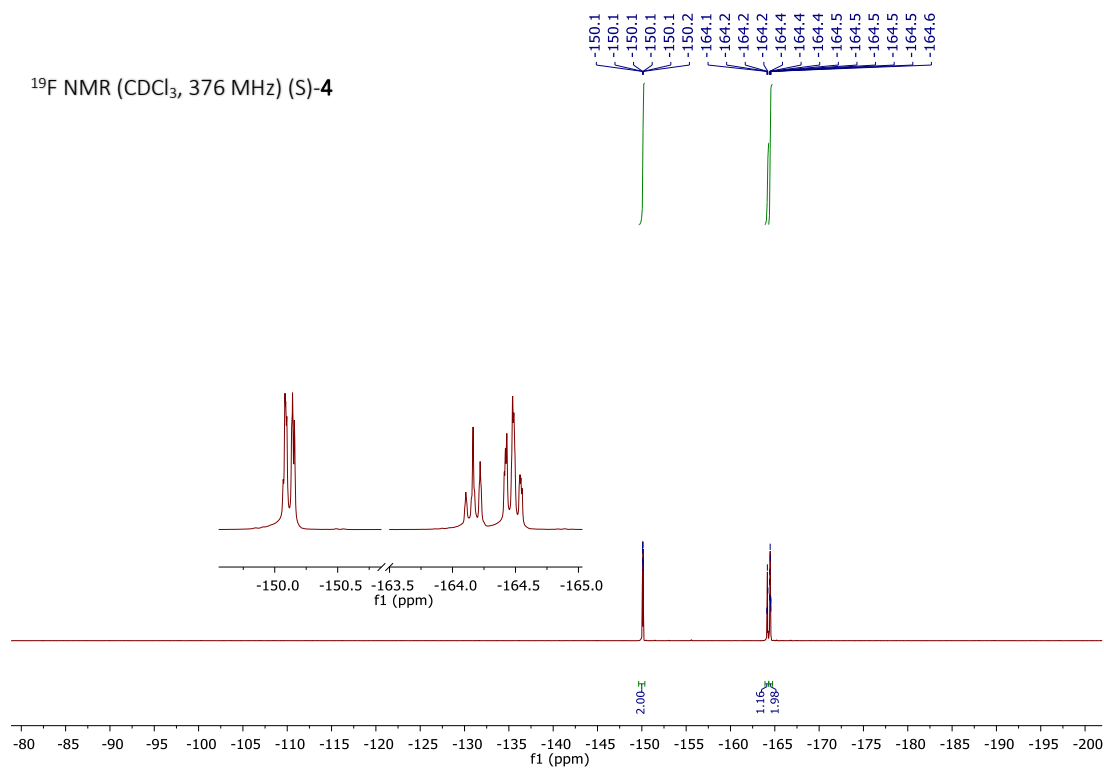



# Compound (S)-5

$^1\text{H}$  NMR (DMSO- $d_6$ , 400 MHz) (S)-5

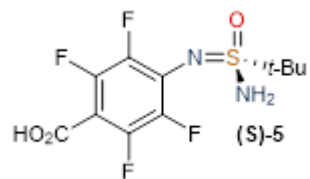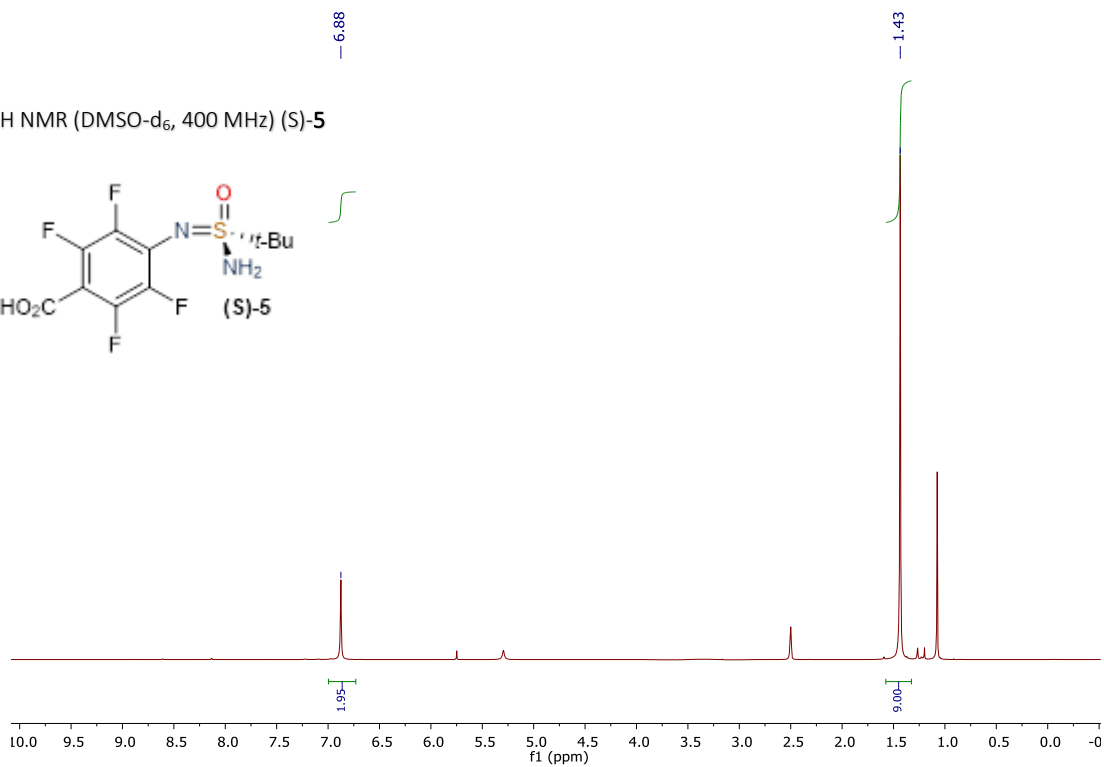

$^{13}\text{C}\{^1\text{H}\}$  NMR (DMSO- $d_6$ , 125 MHz) (S)-5

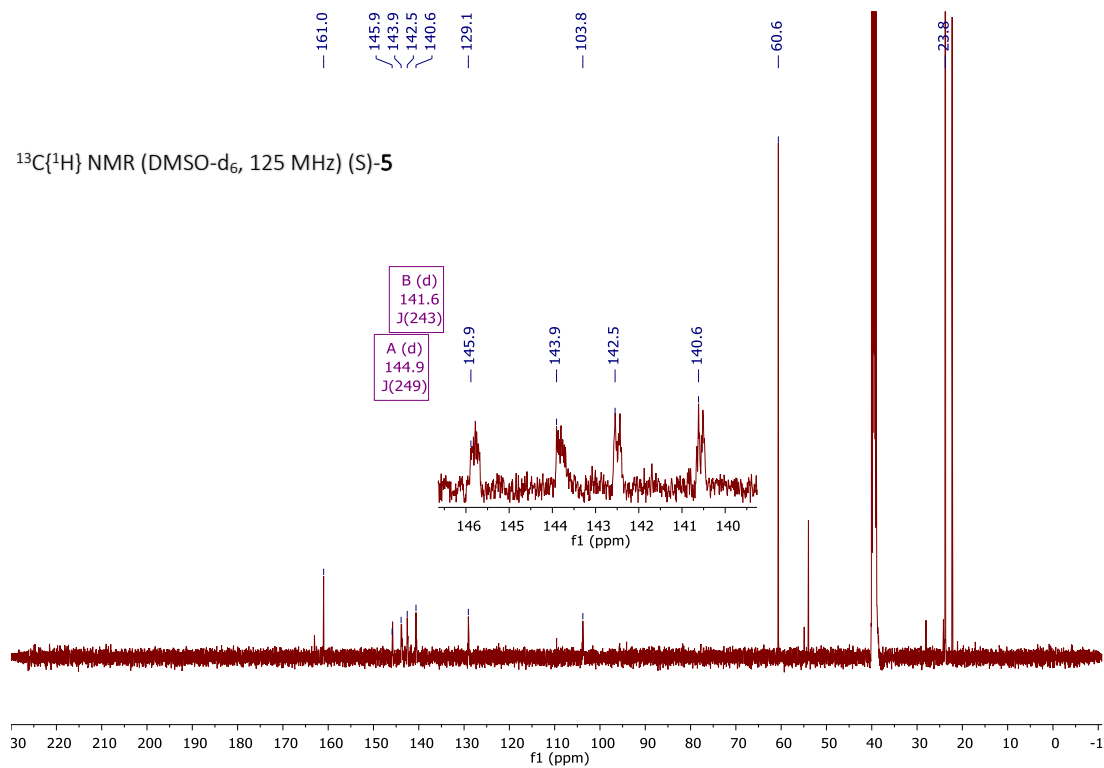

$^{19}\text{F}$  NMR (DMSO- $d_6$ , 376 MHz) (S)-5

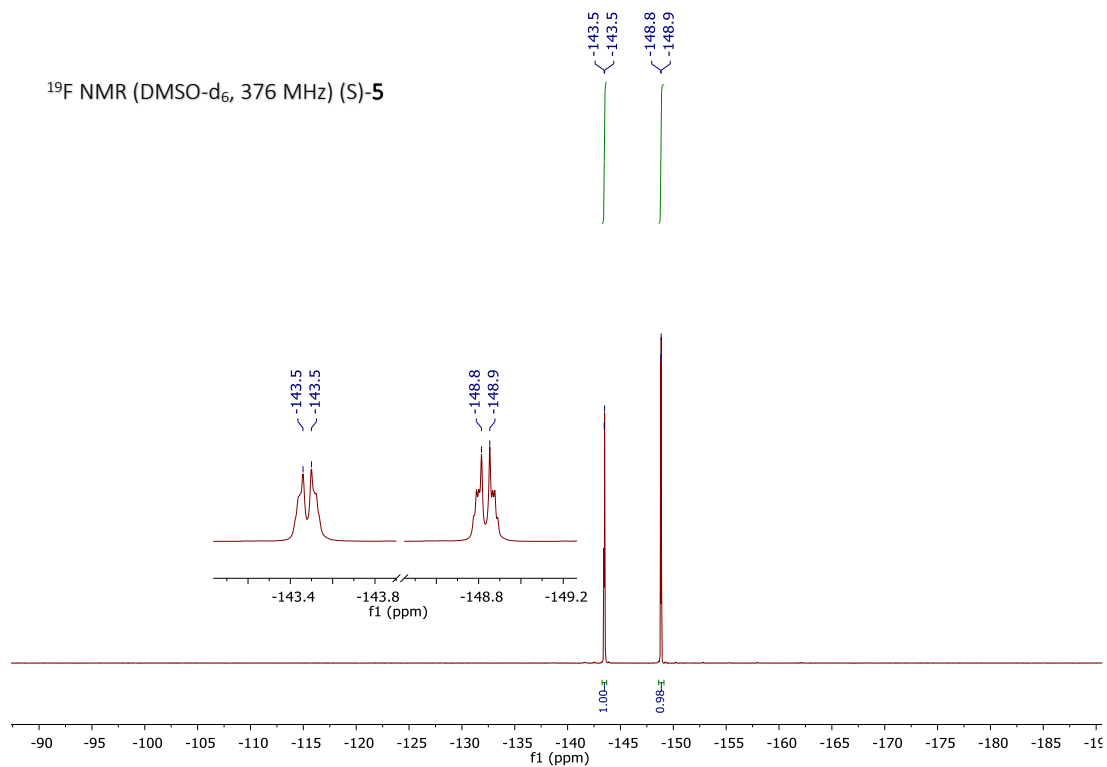

Compound (S)-7

$^1\text{H}$  NMR (DMSO- $d_6$ , 500 MHz) (S)-7

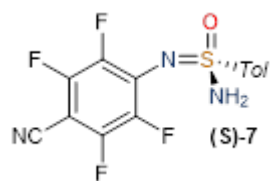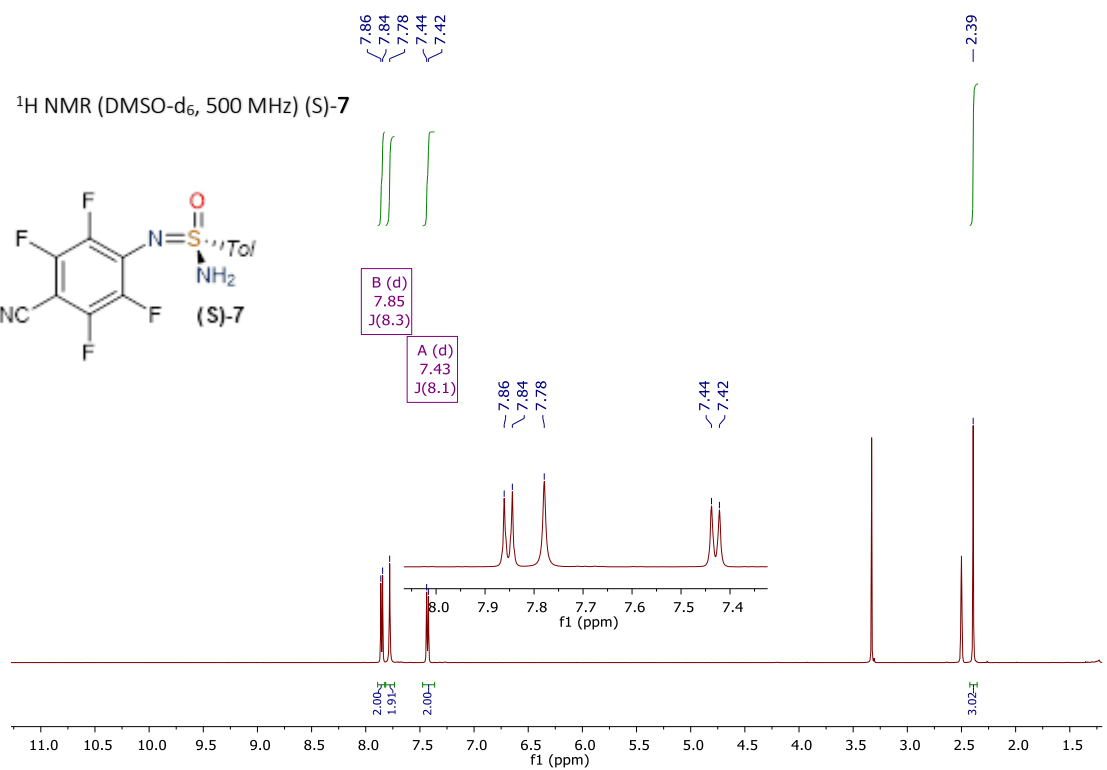

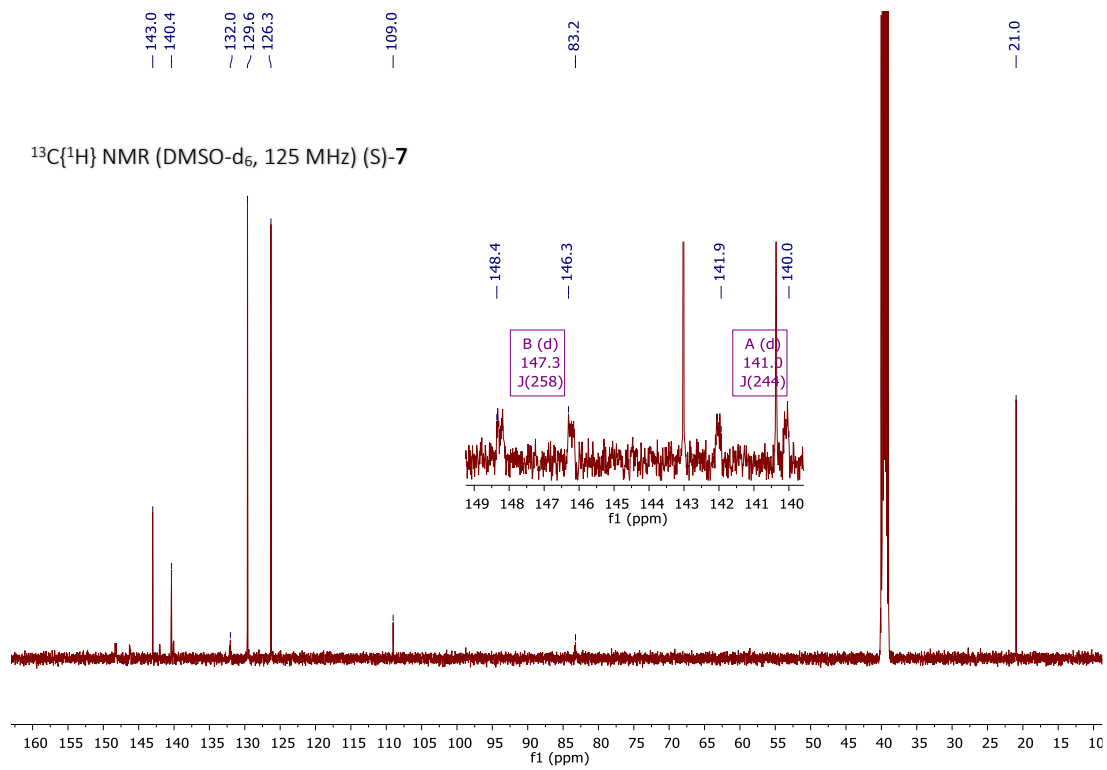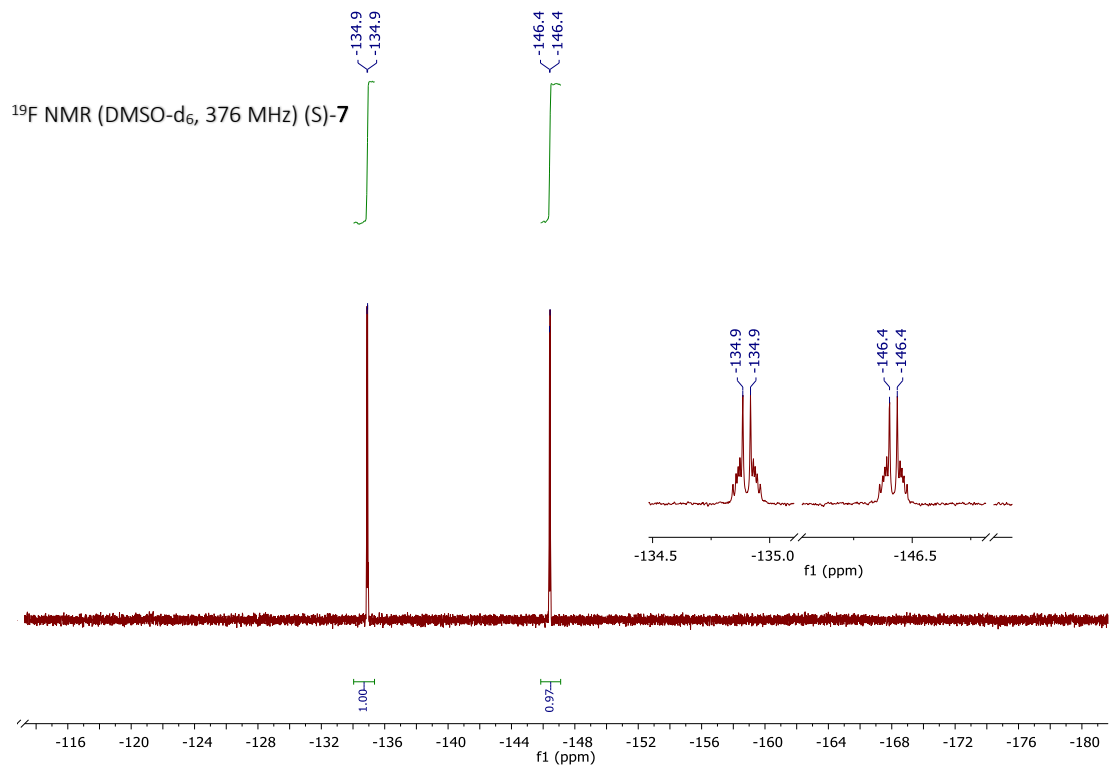

Compound *Rac-8*

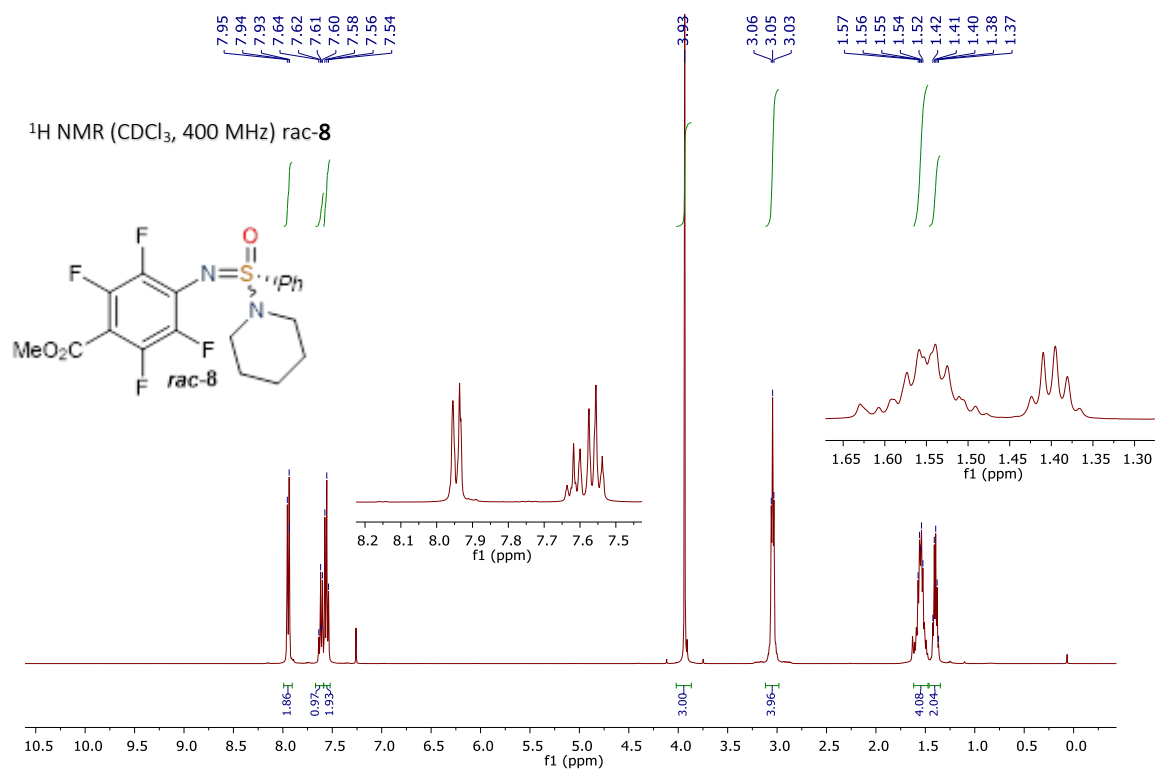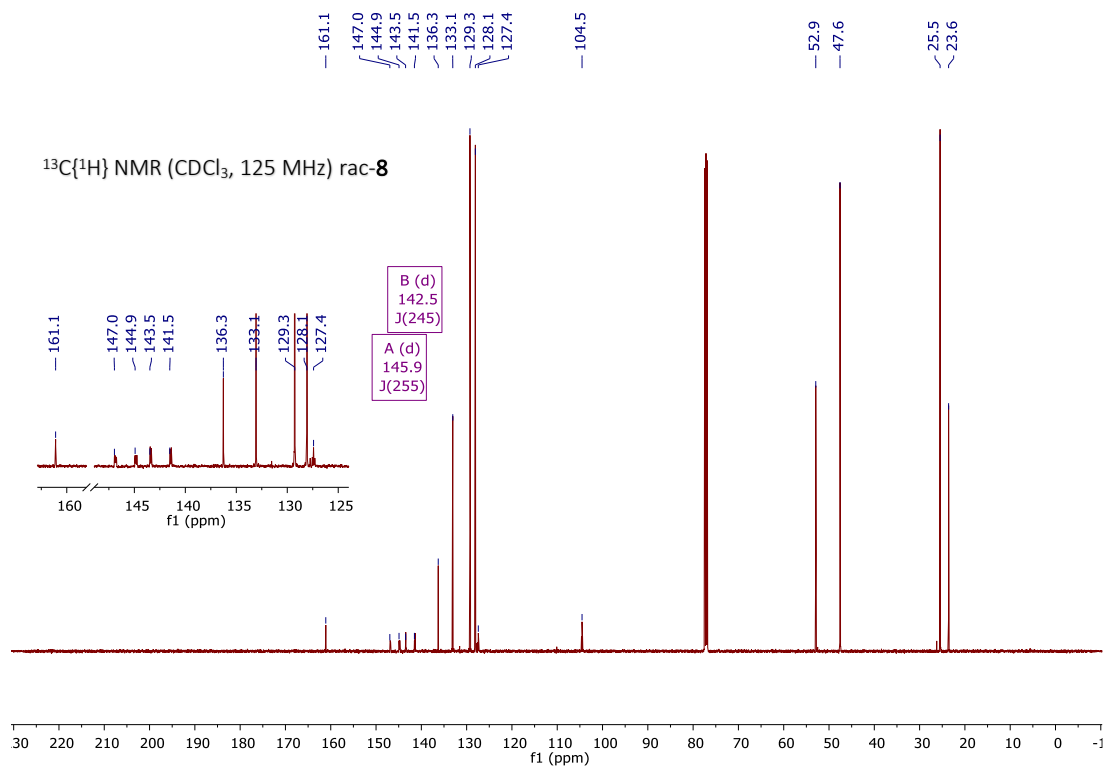

$^{19}\text{F}$  NMR ( $\text{CDCl}_3$ , 376 MHz) rac-8

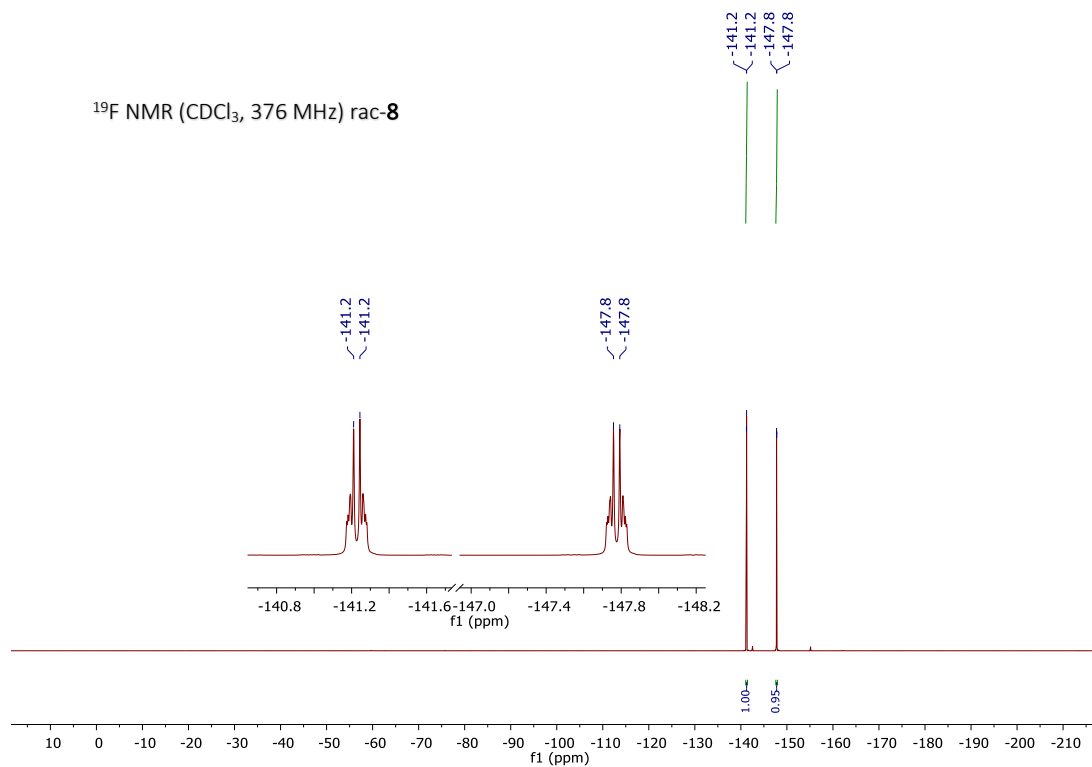

Compound 9

$^1\text{H}$  NMR ( $\text{CDCl}_3$ , 400 MHz) 9

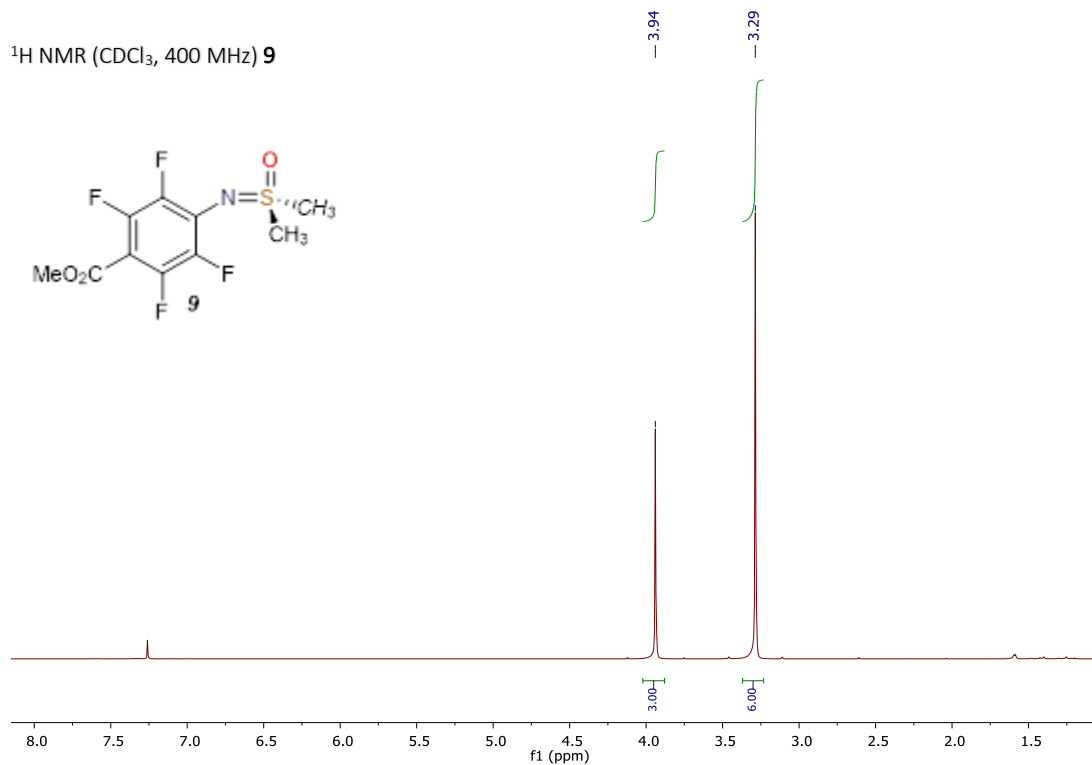

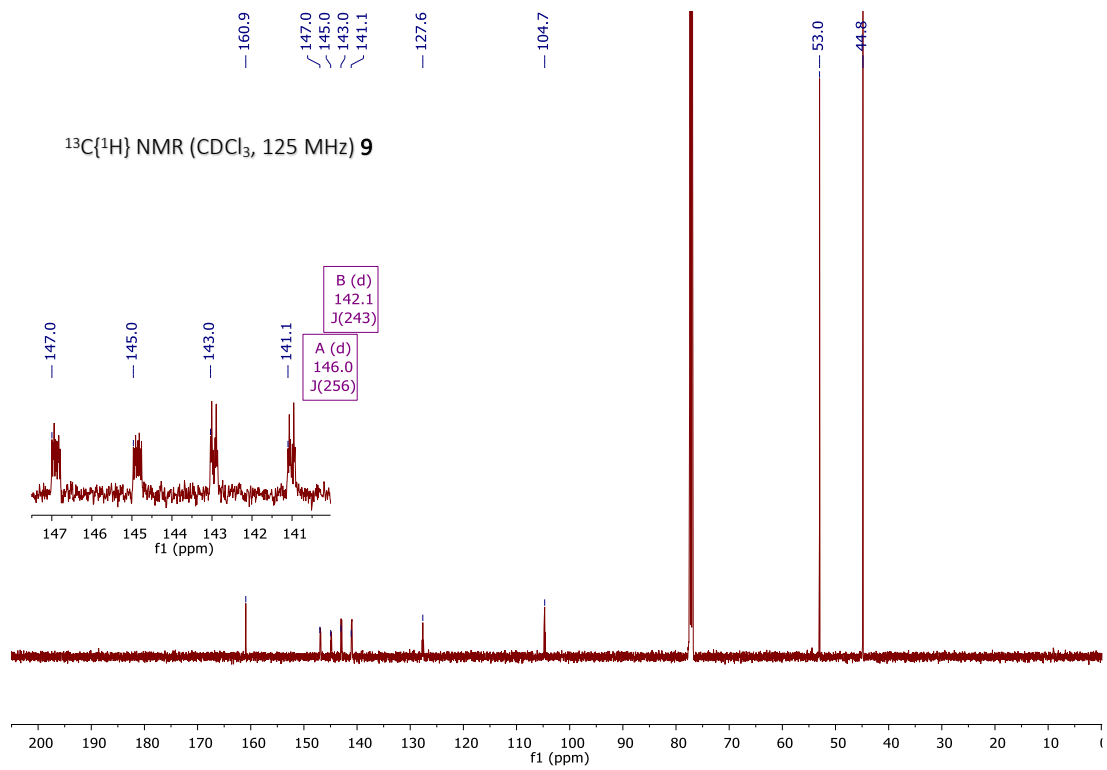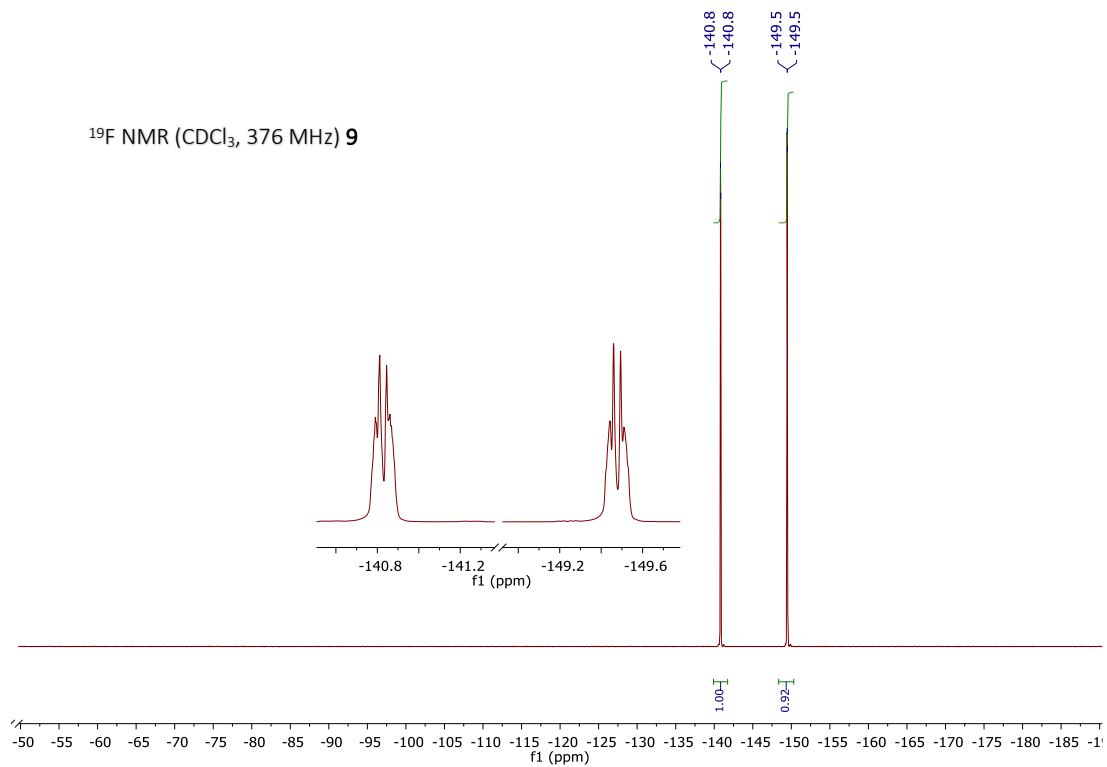

Compound *rac-10*

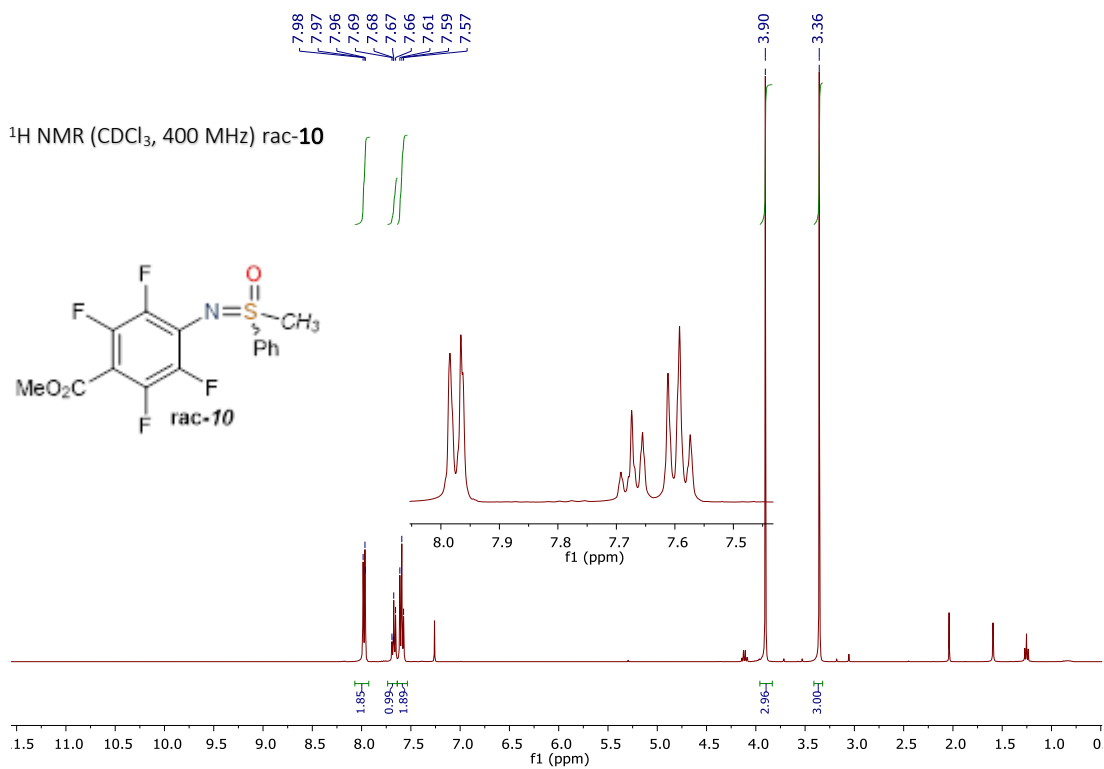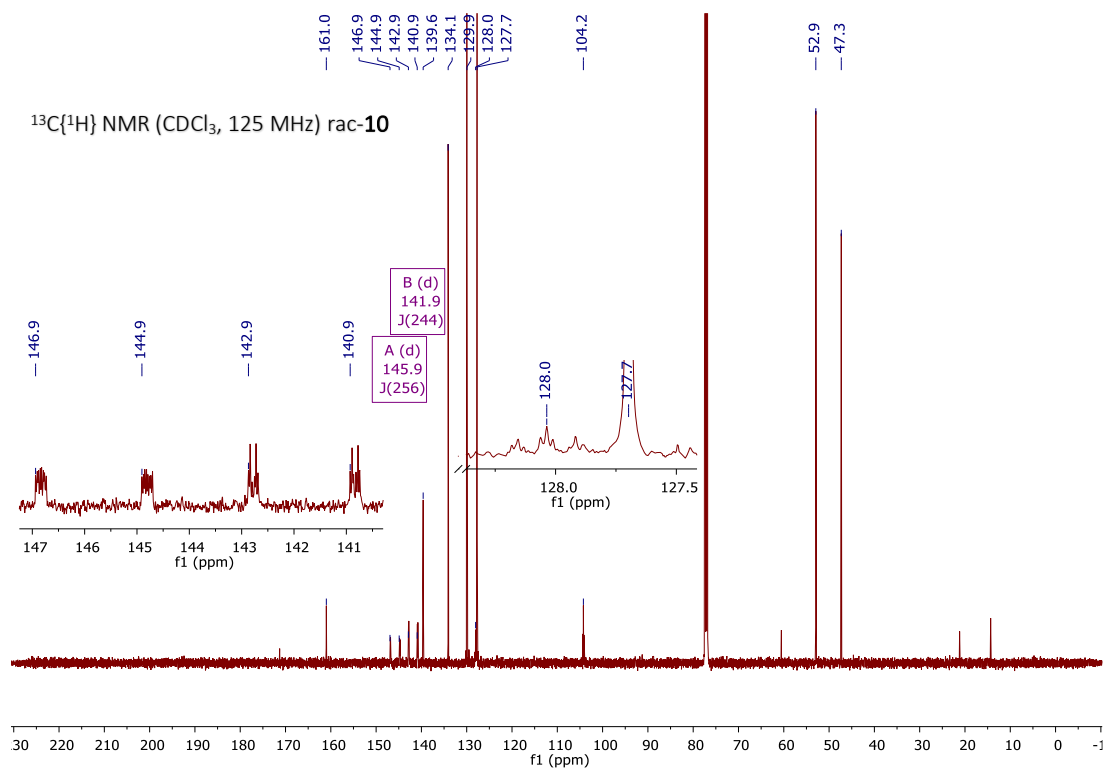

$^{19}\text{F}$  NMR ( $\text{CDCl}_3$ , 376 MHz) **rac-10**

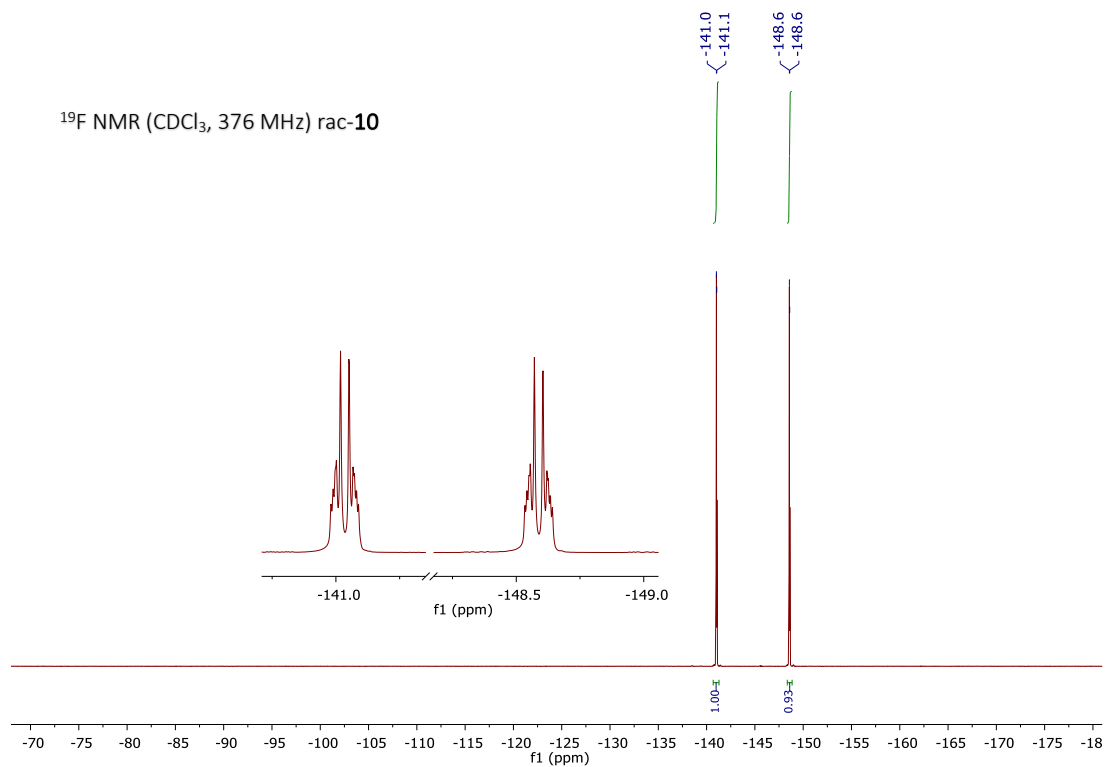

Compound **rac-11**

$^1\text{H}$  NMR ( $\text{CDCl}_3$ , 400 MHz) **rac-11**

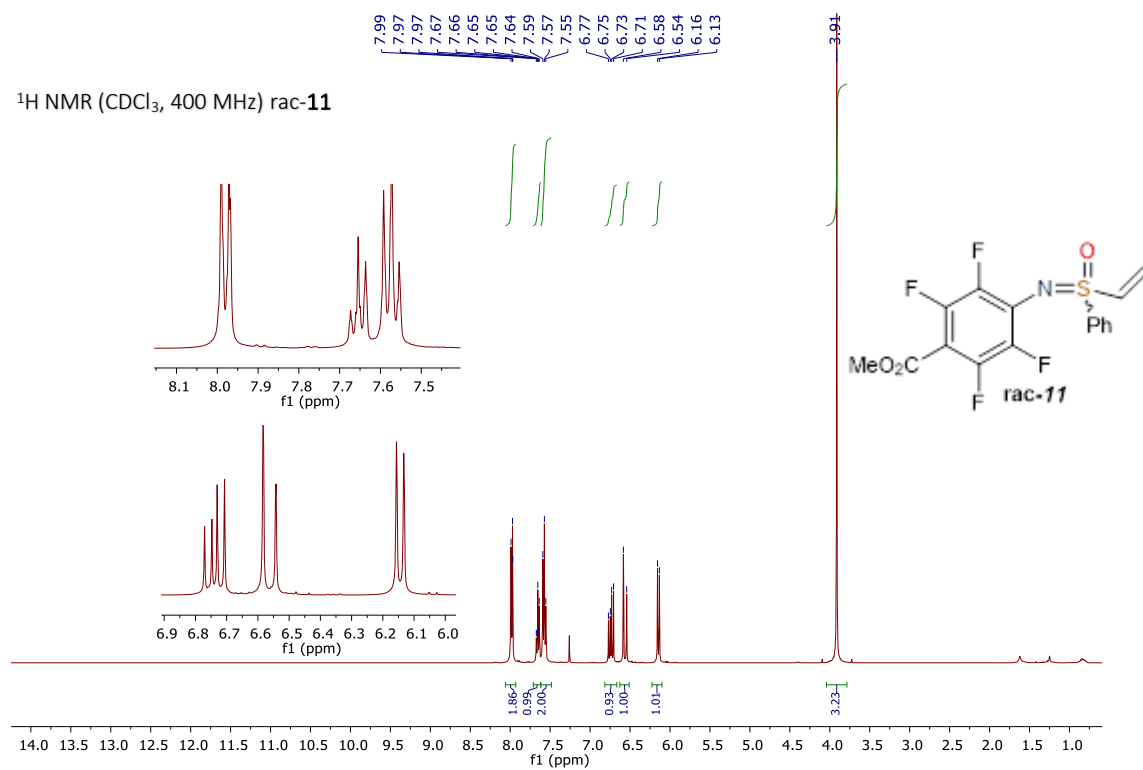



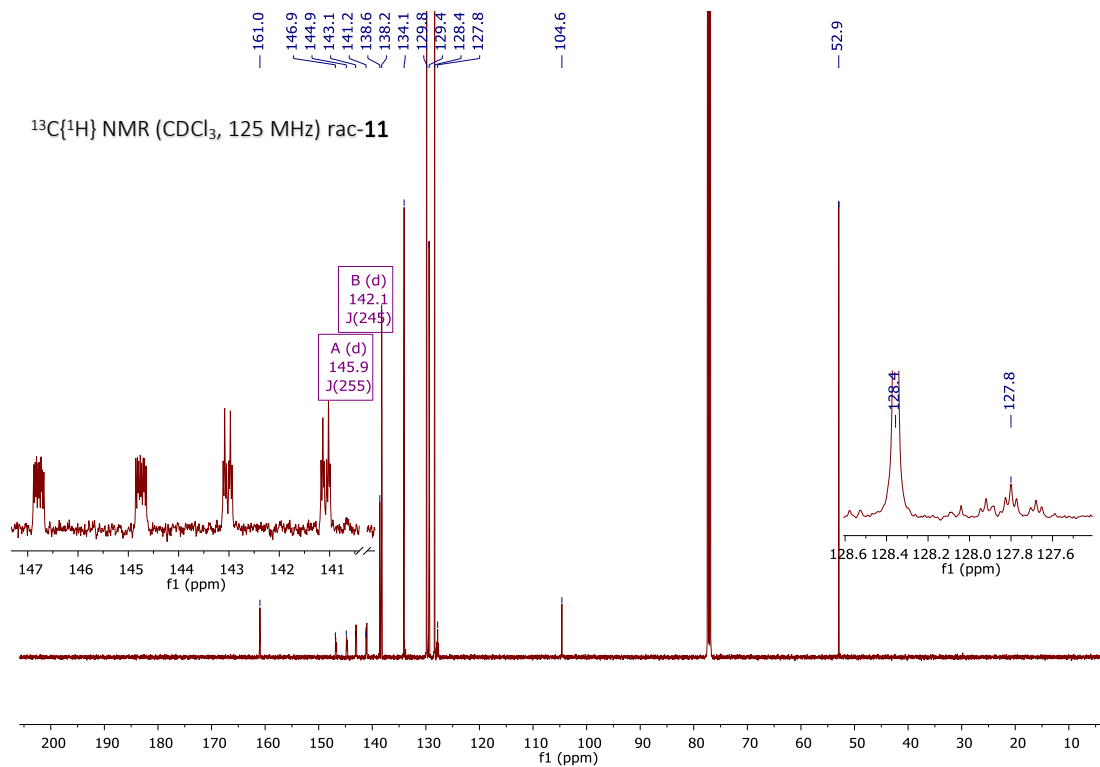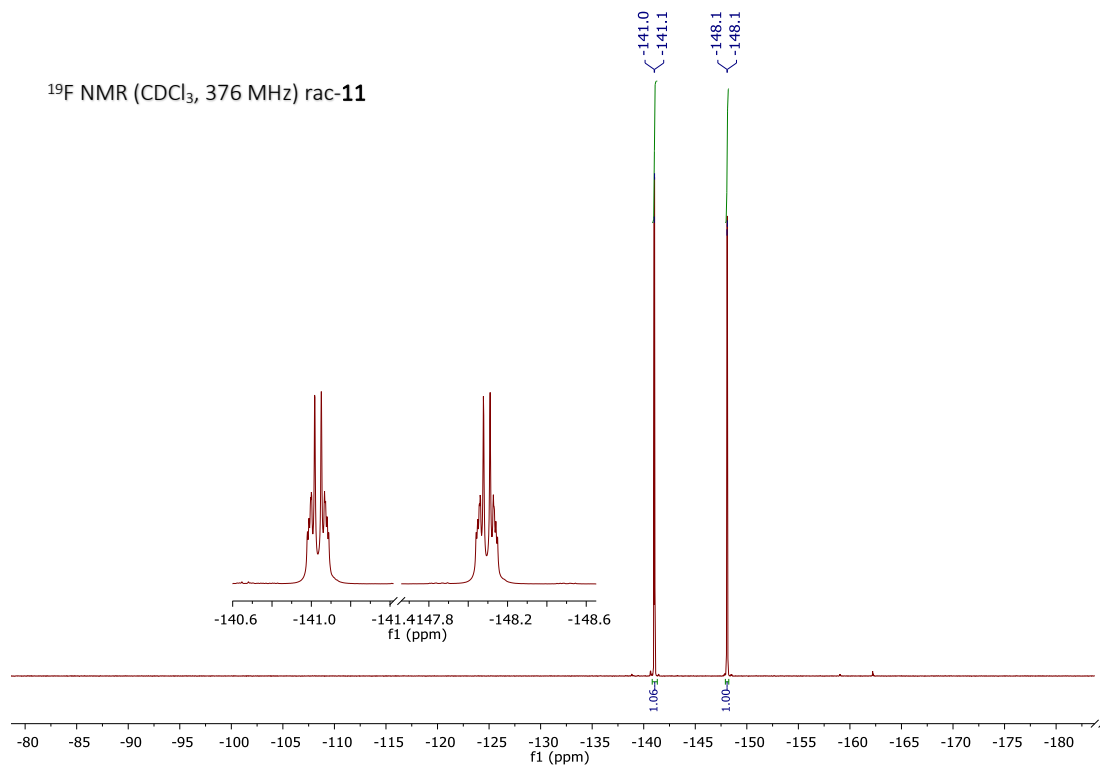

Compound *rac-12*

<sup>1</sup>H NMR (CDCl<sub>3</sub>, 500 MHz) *rac-12*

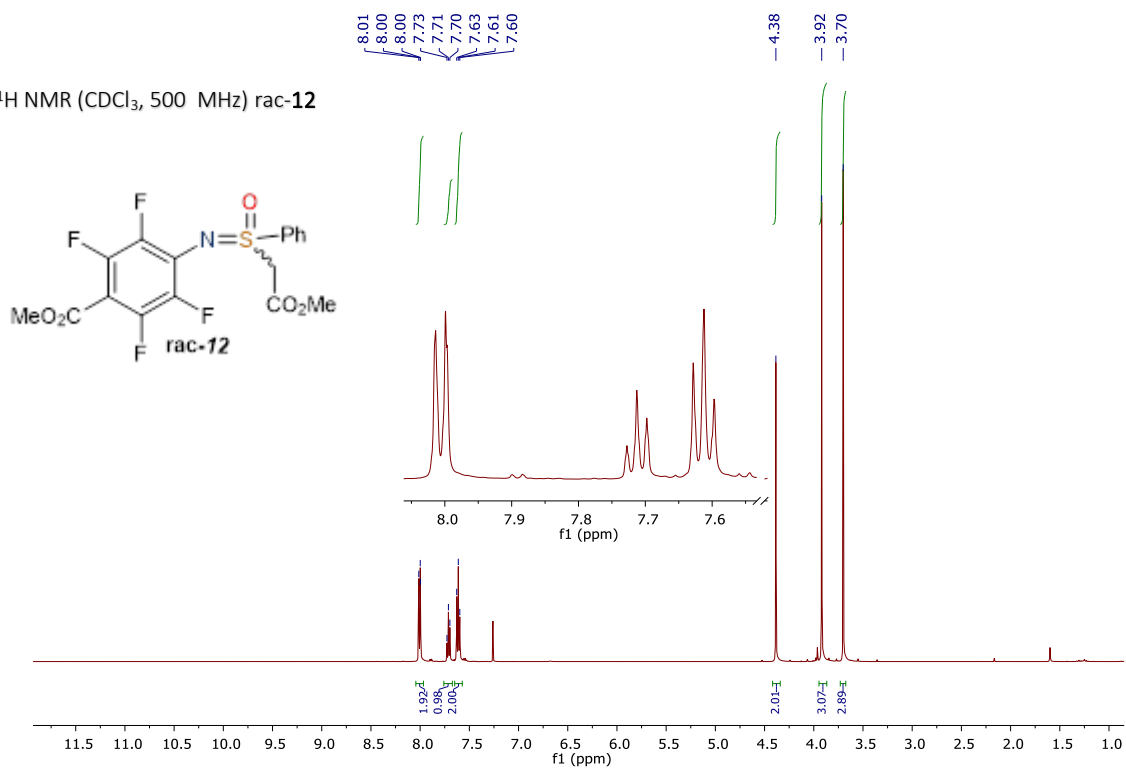

<sup>13</sup>C{<sup>1</sup>H} NMR (CDCl<sub>3</sub>, 125 MHz) *rac-12*

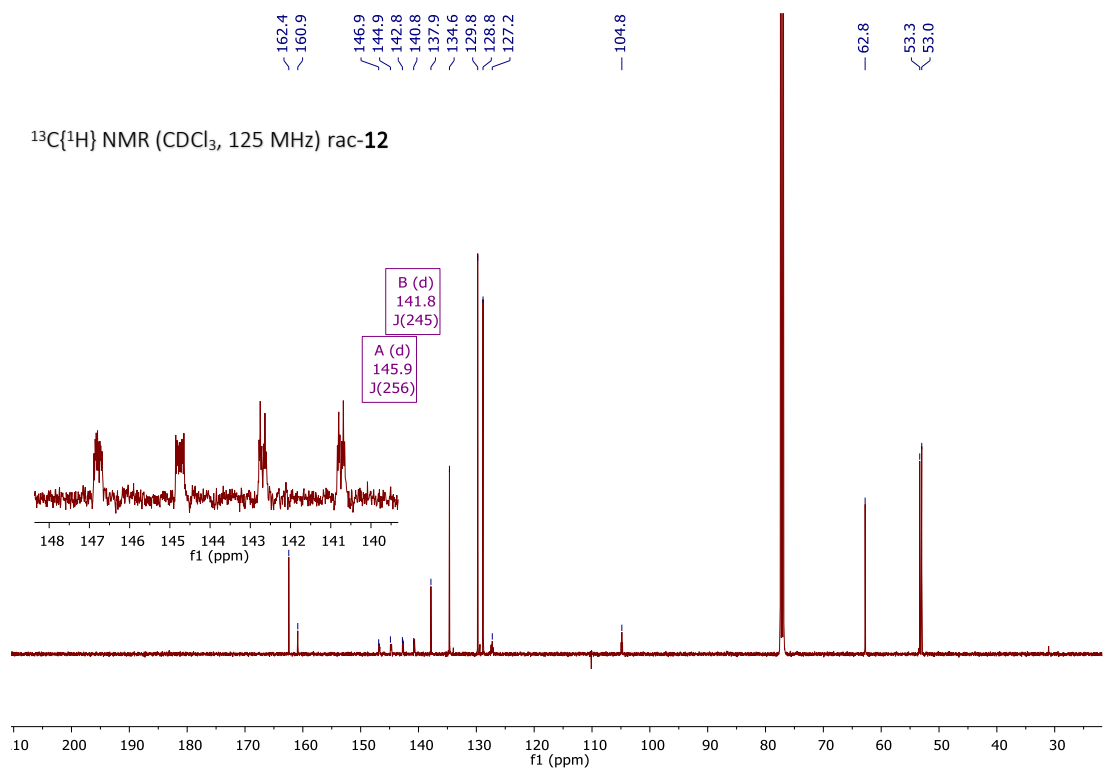

$^{19}\text{F}$  NMR ( $\text{CDCl}_3$ , 376 MHz) rac-12

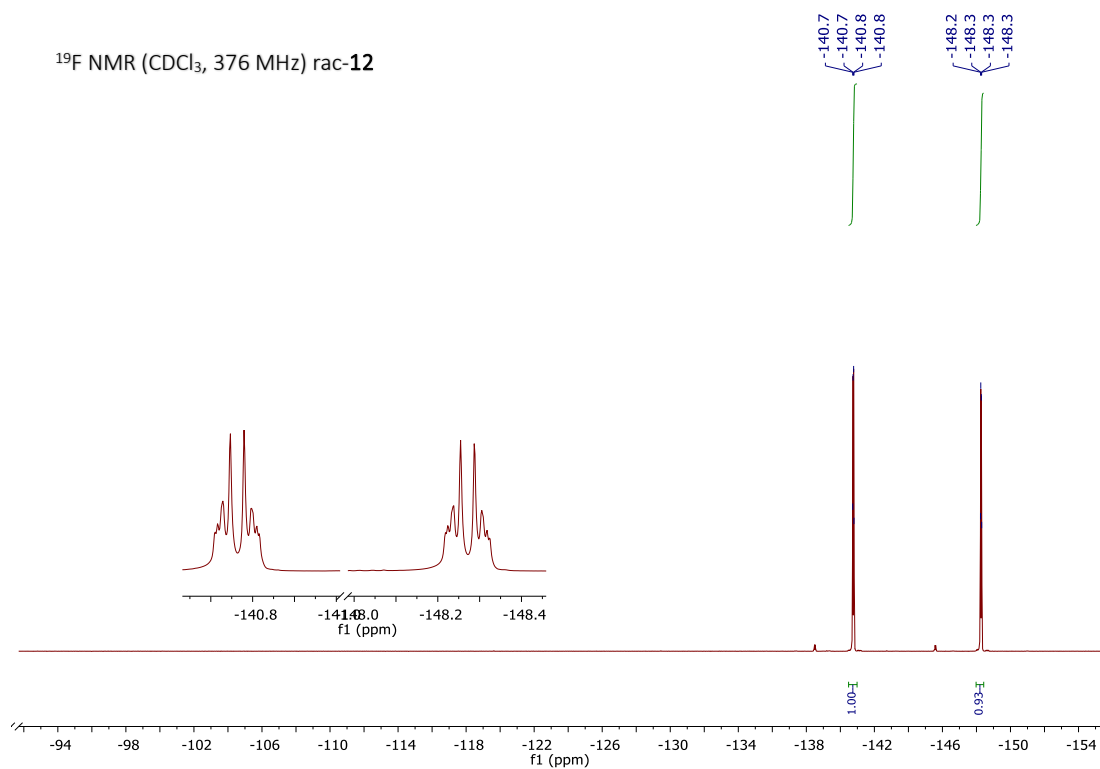

Compound (*R*)-13

$^1\text{H}$  NMR ( $\text{CDCl}_3$ , 400 MHz) (*R*)-13

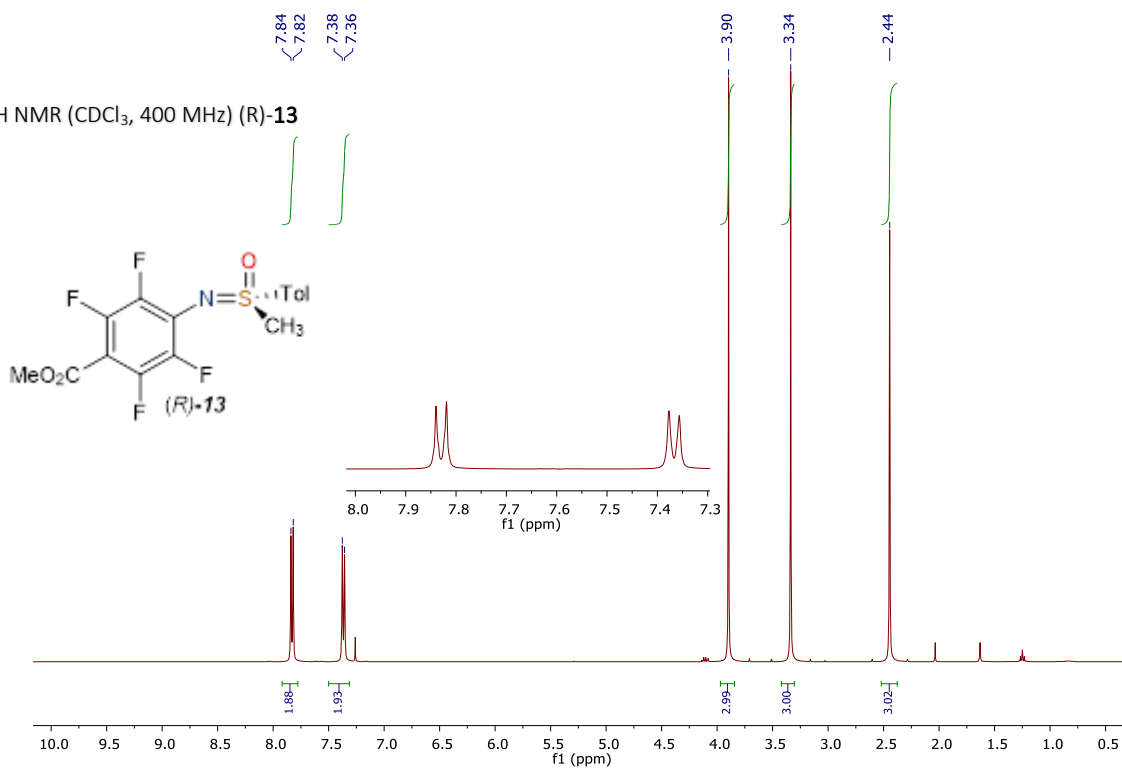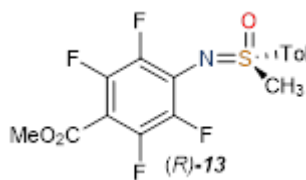

$^{13}\text{C}\{^1\text{H}\}$  NMR ( $\text{CDCl}_3$ , 125 MHz) (R)-**13**

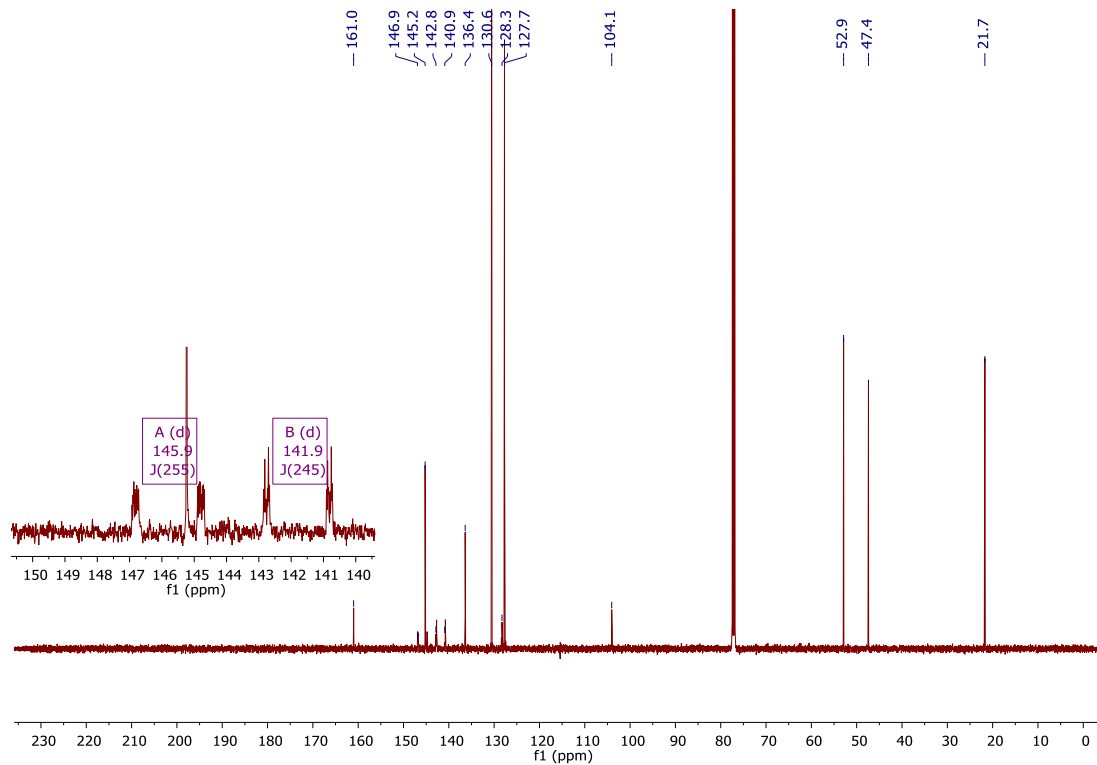

$^{19}\text{F}\{^1\text{H}\}$  NMR ( $\text{CDCl}_3$ , 376 MHz) (R)-**13**

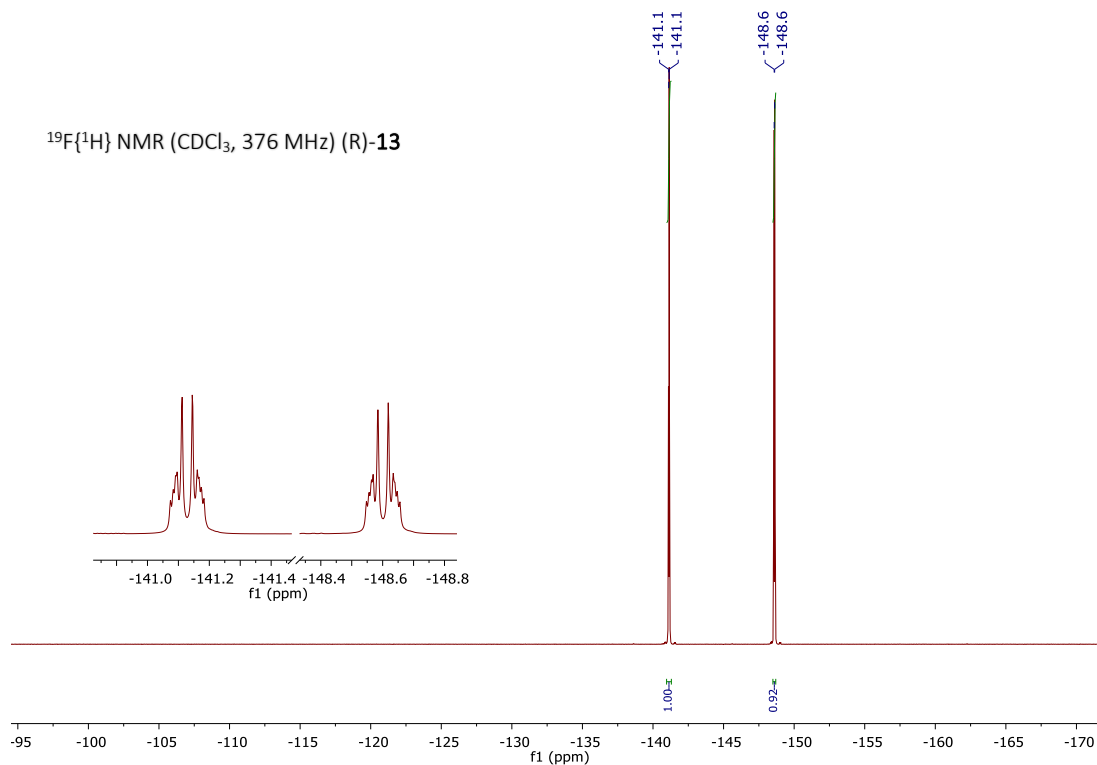

Compound *rac-14*

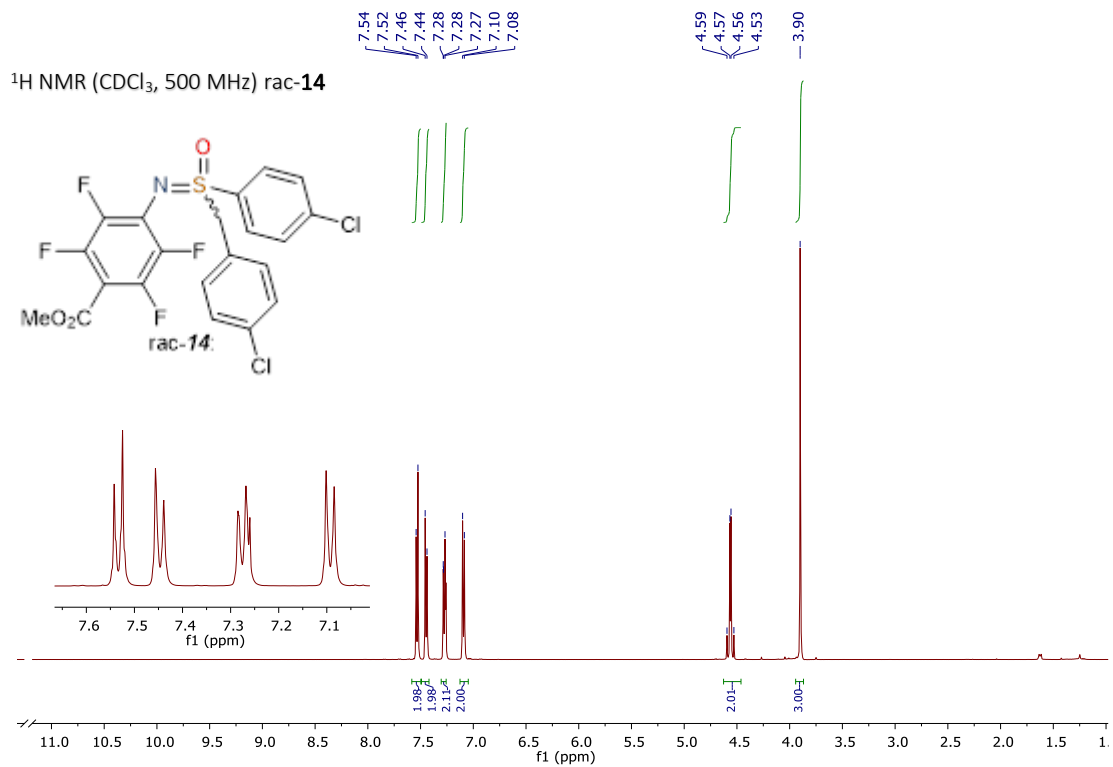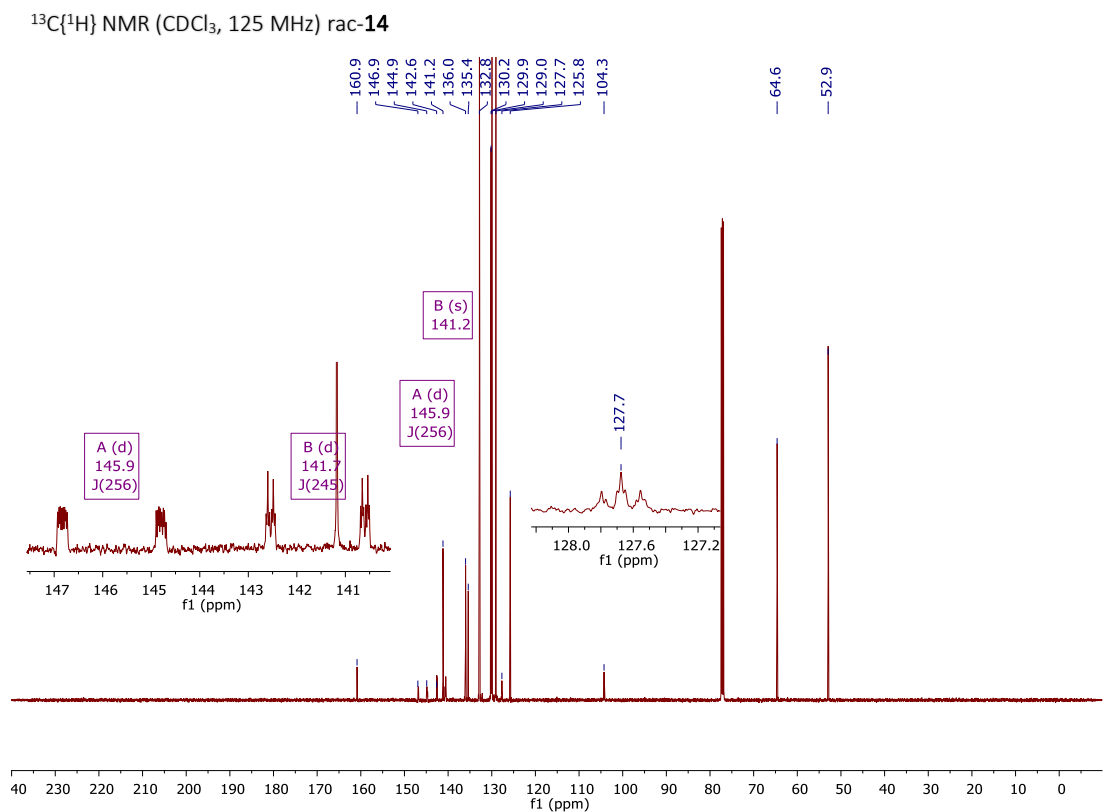

$^{19}\text{F}$  NMR ( $\text{CDCl}_3$ , 376 MHz) rac-**14**

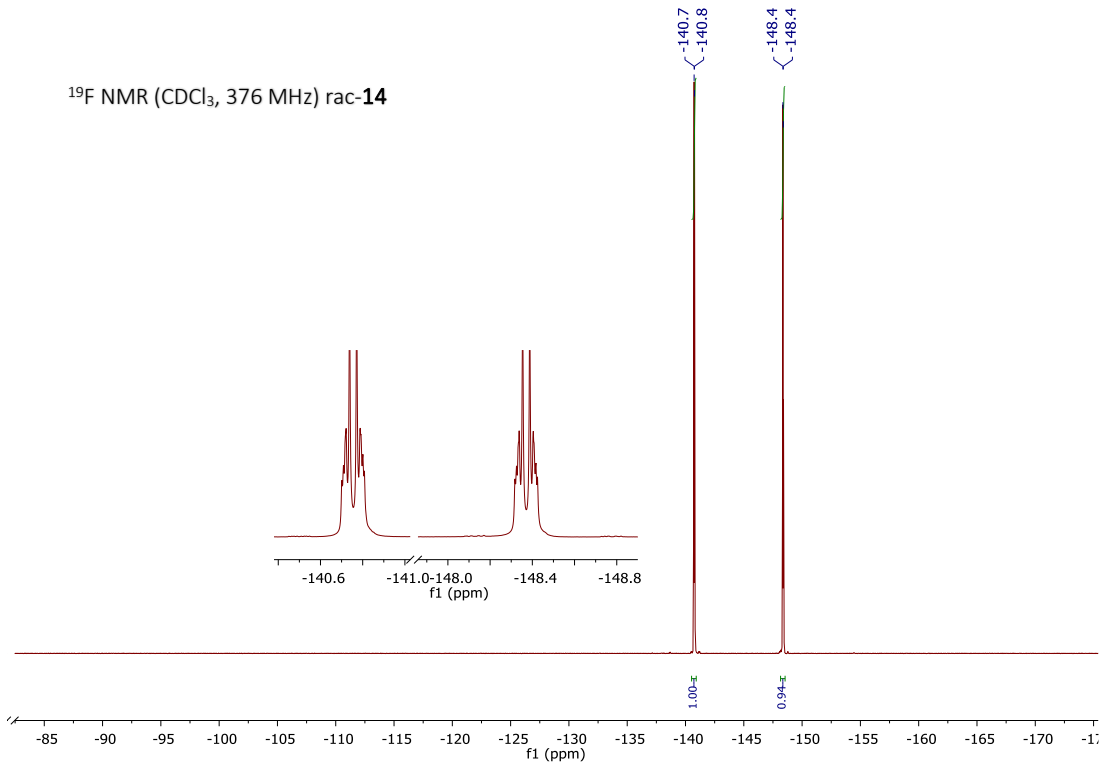

Compound **15**

$^1\text{H}$  NMR ( $\text{CDCl}_3$ , 500 MHz) **15**

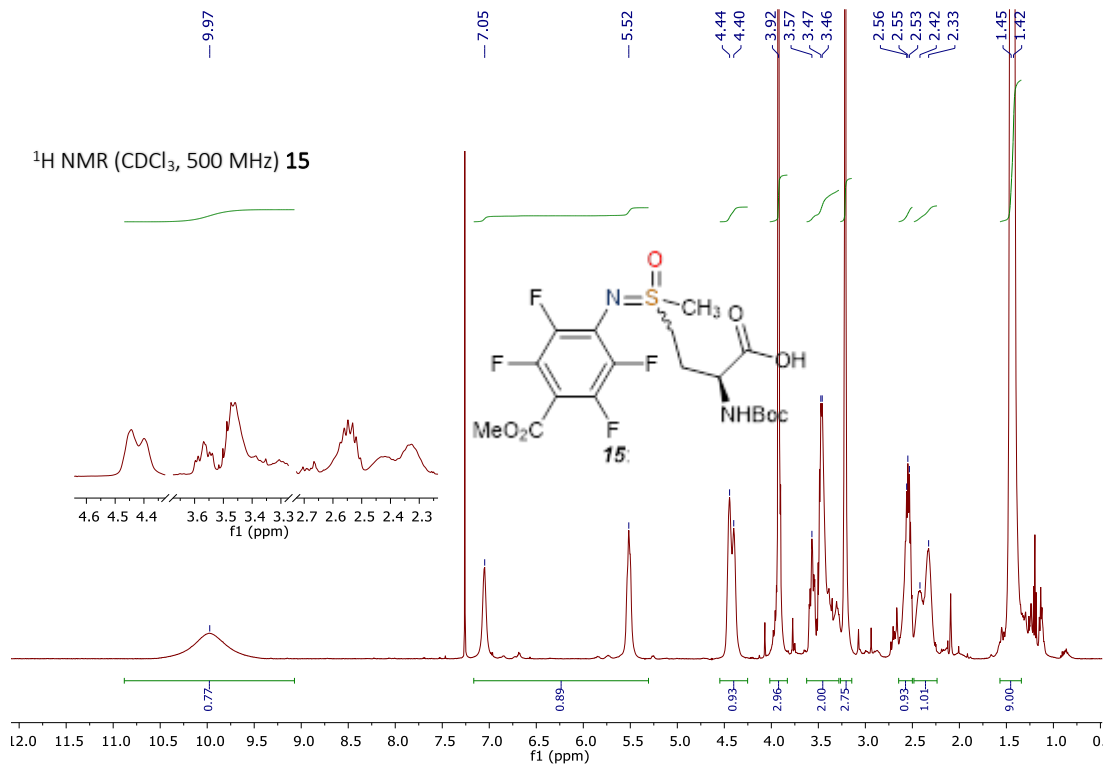

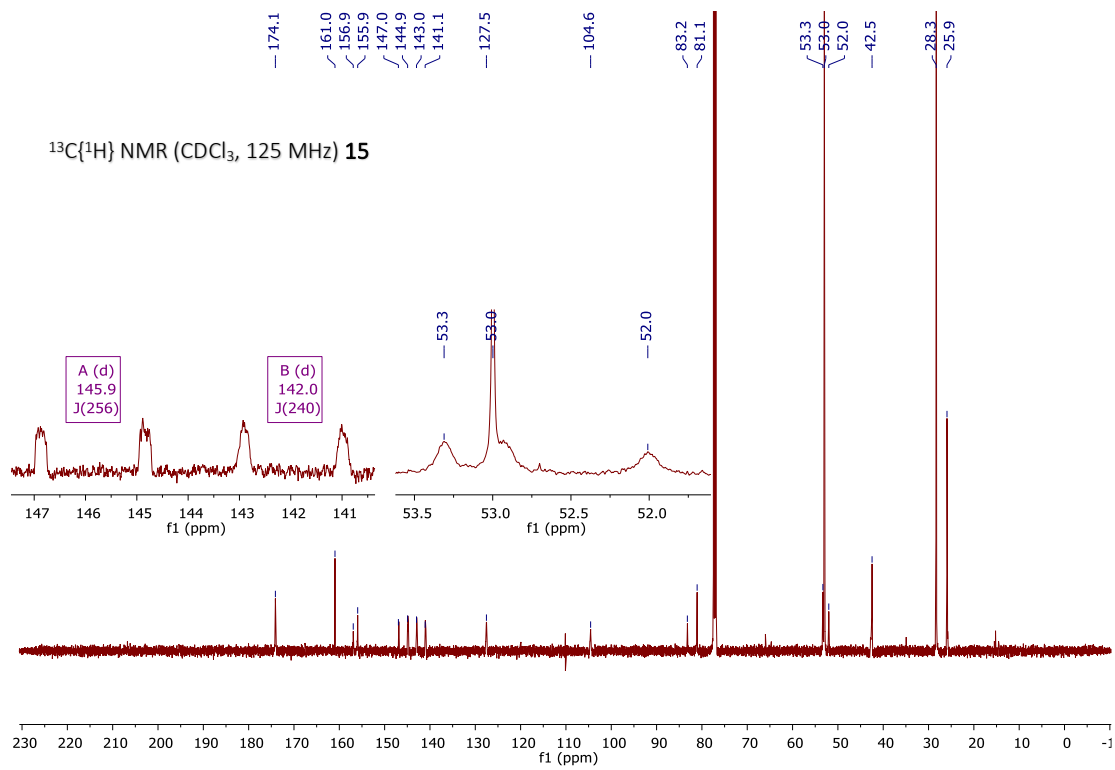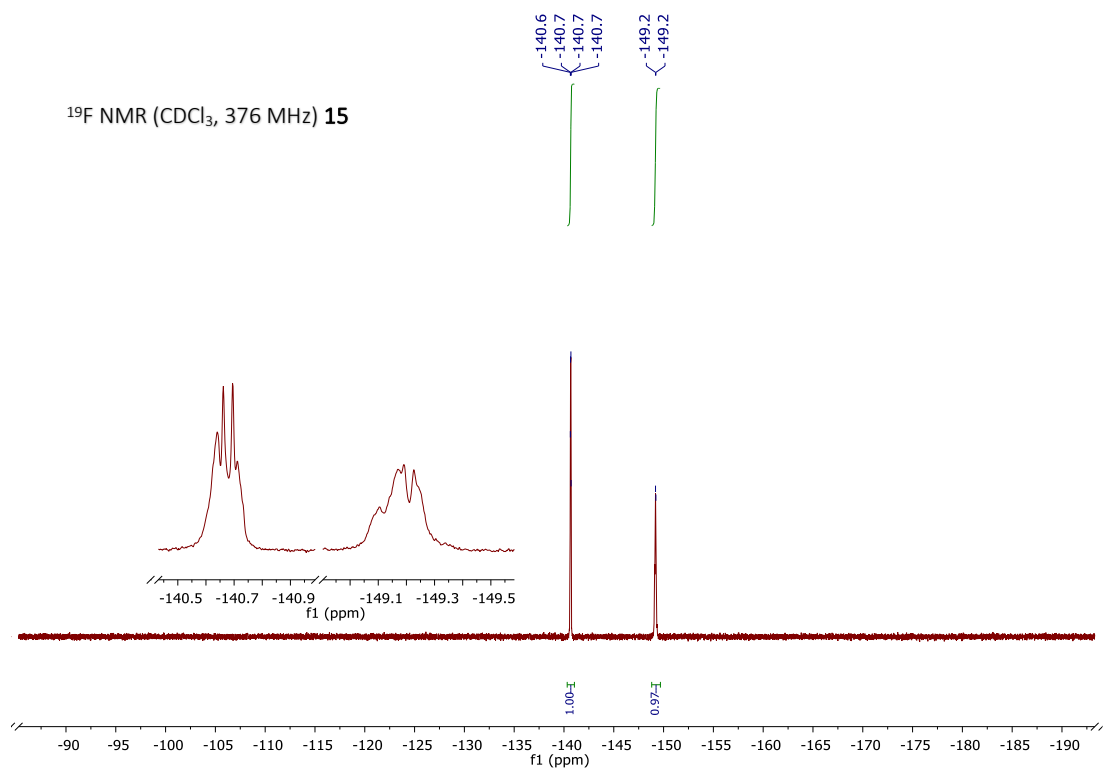

Compound (R)-16a

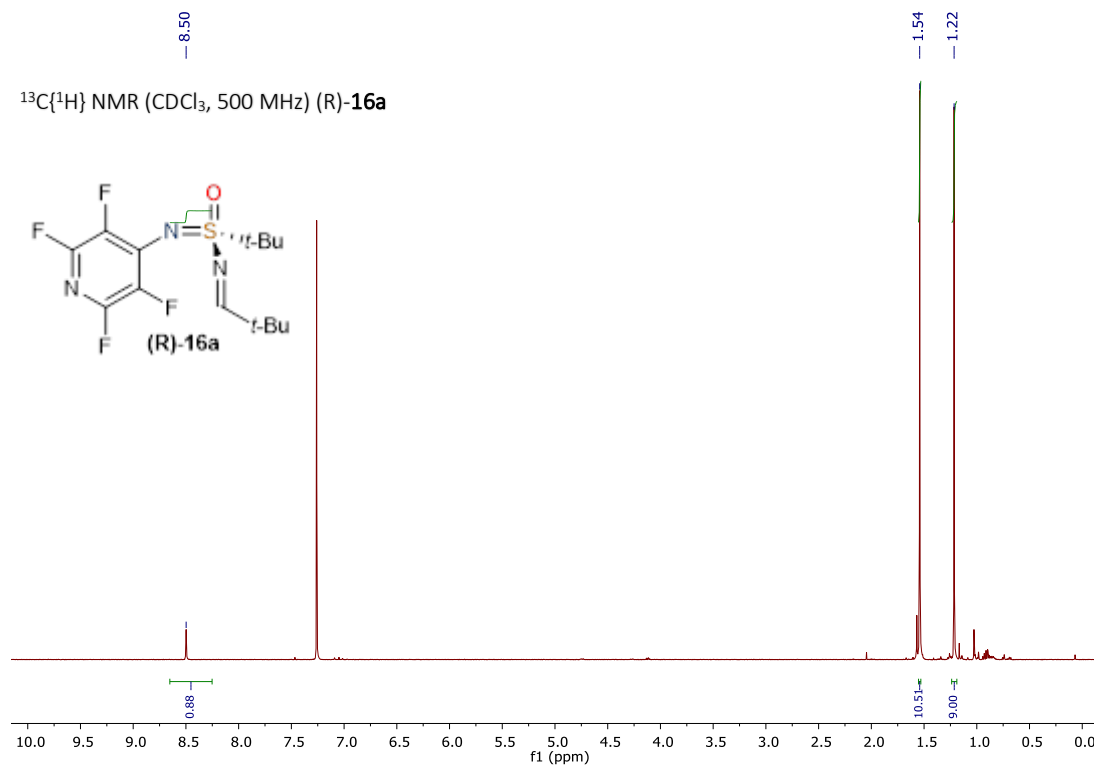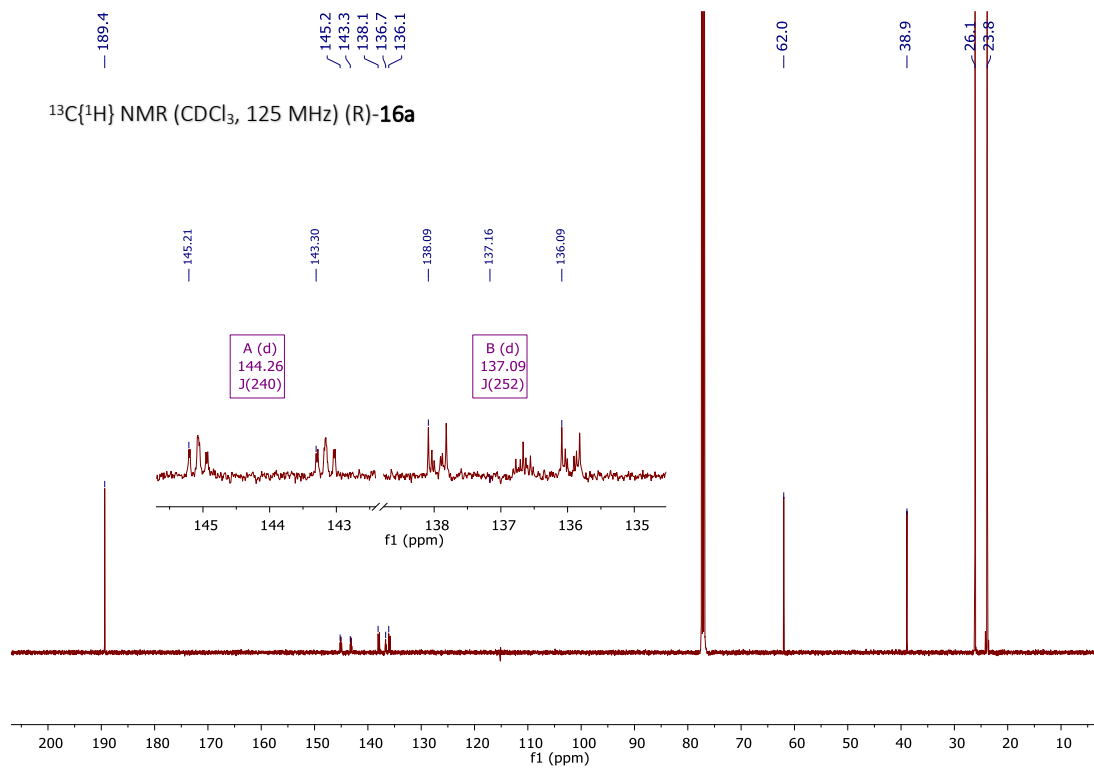



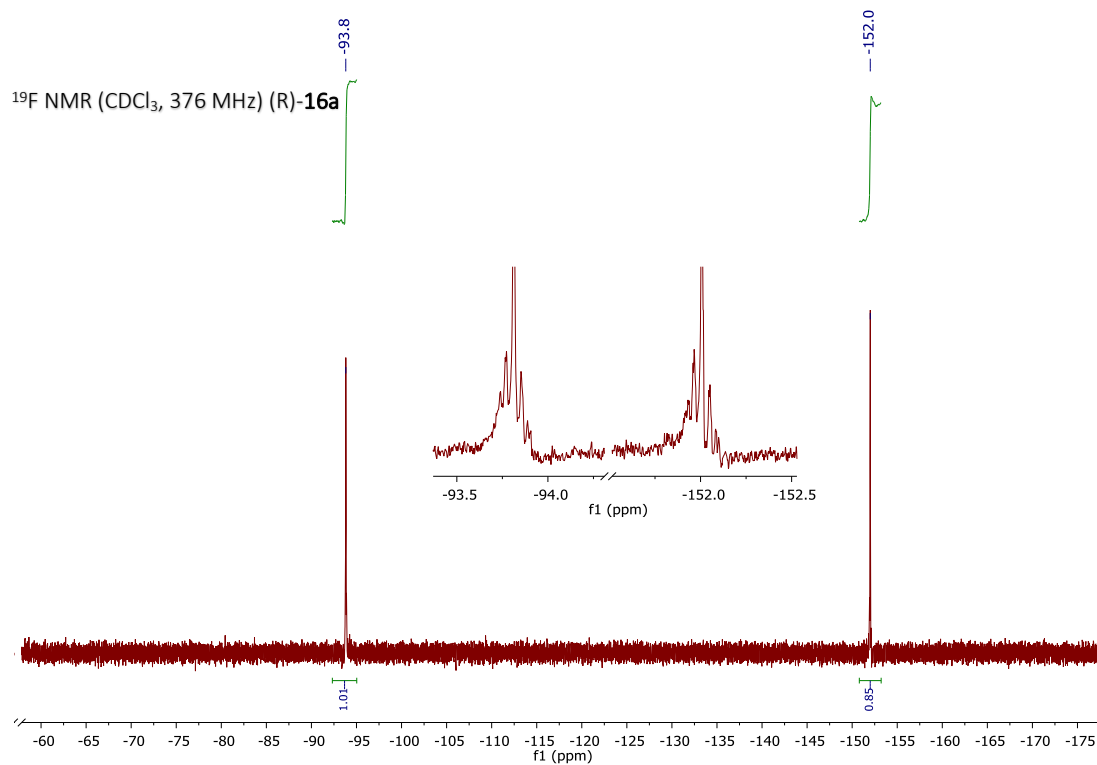

Compound (R)-**16b**

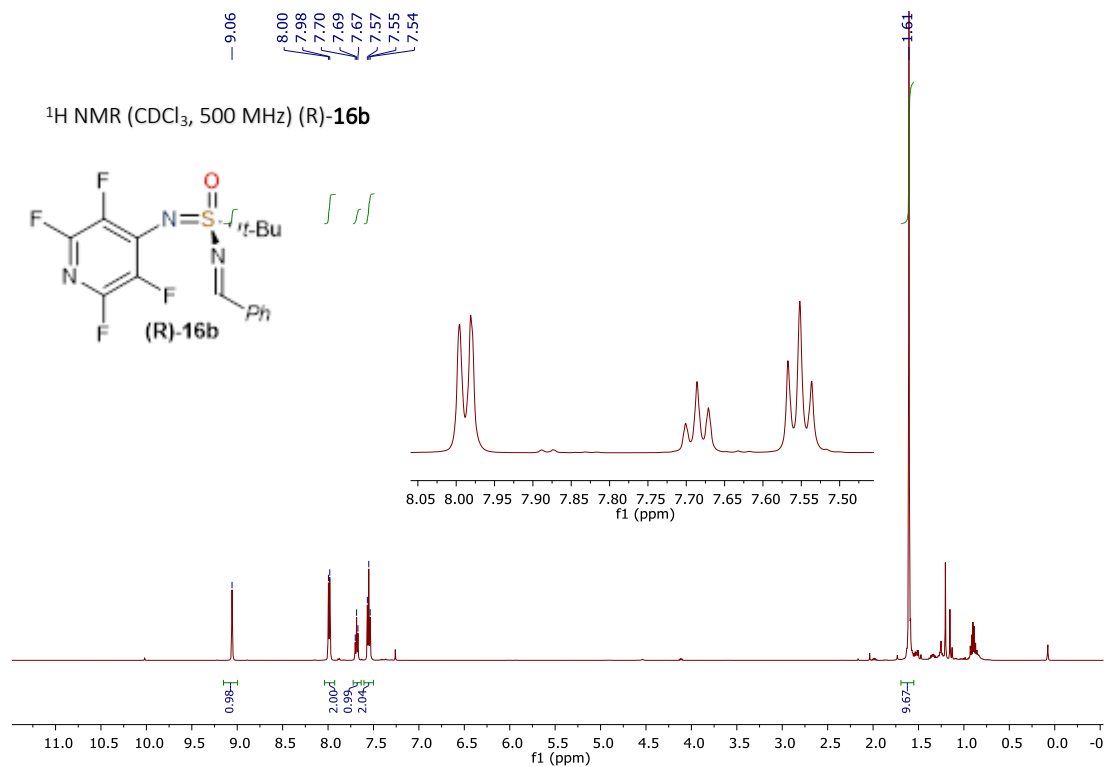

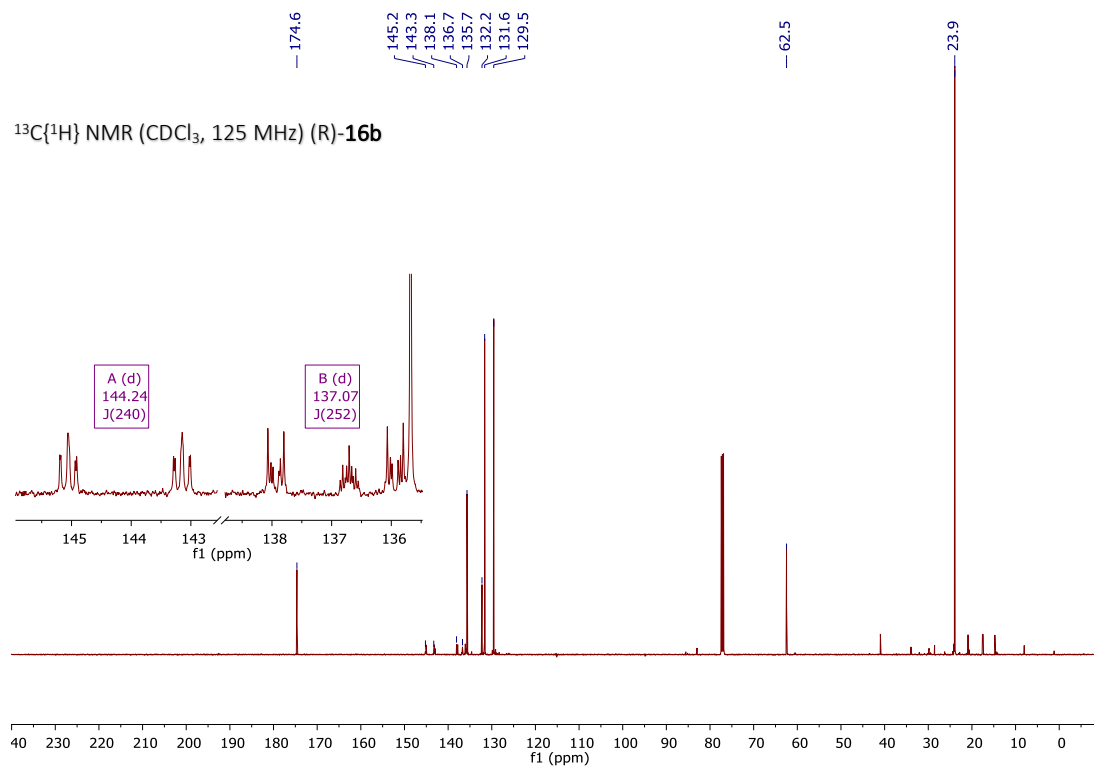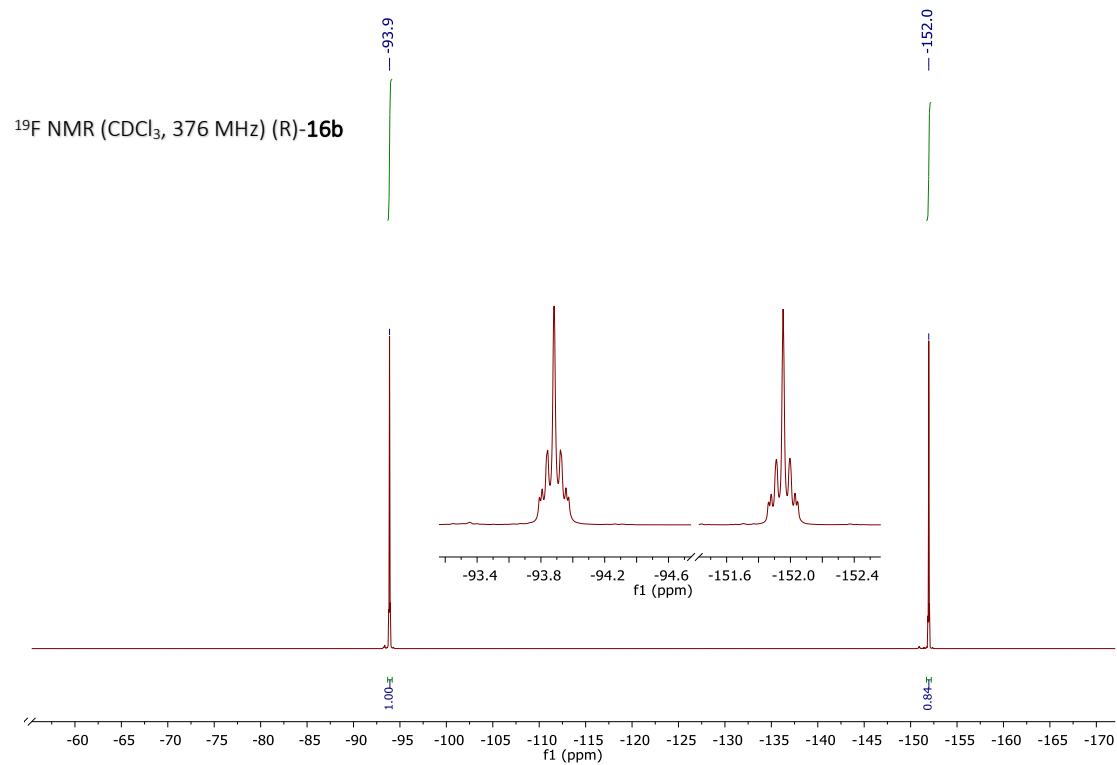



$^{19}\text{F}$  NMR ( $\text{CDCl}_3$ , 376 MHz) (R)-16c

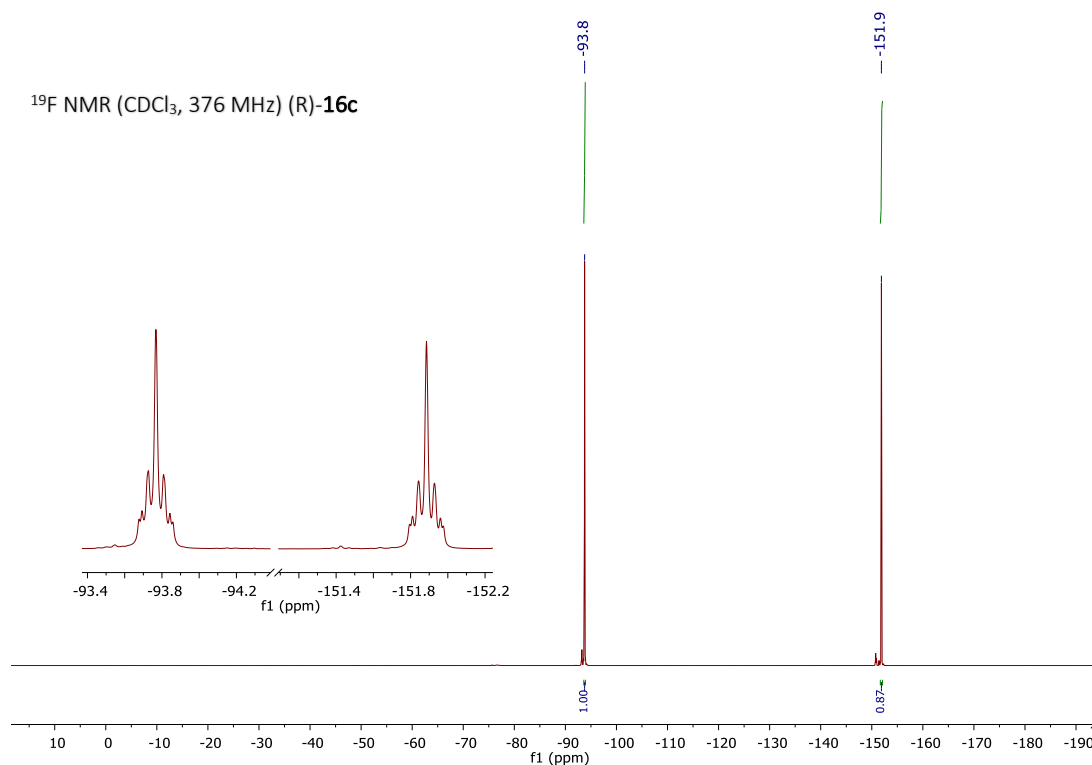

Compound 17

$^1\text{H}$  NMR ( $\text{CDCl}_3$ , 500 MHz) 17

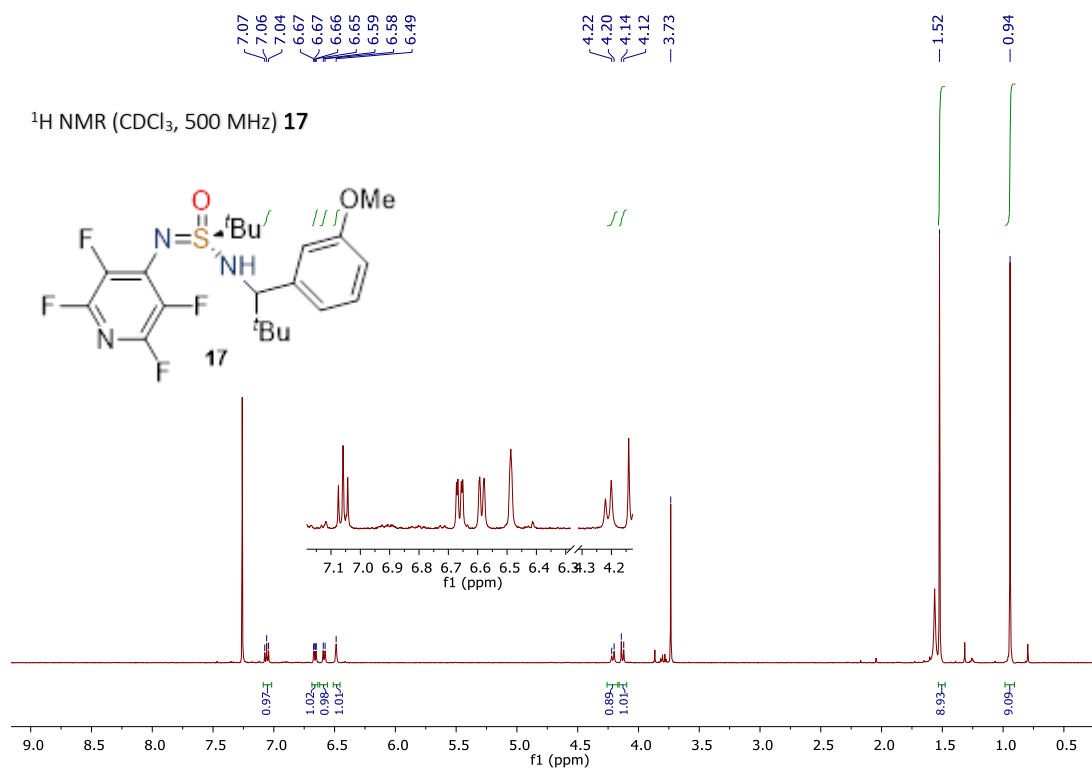

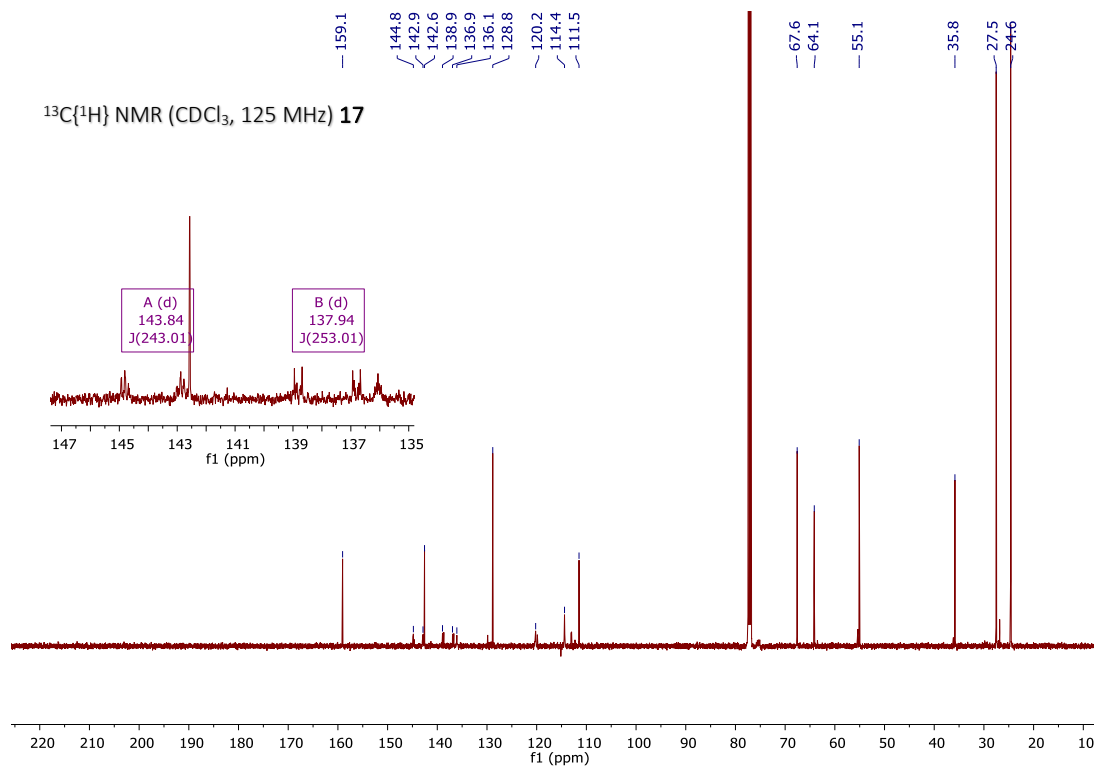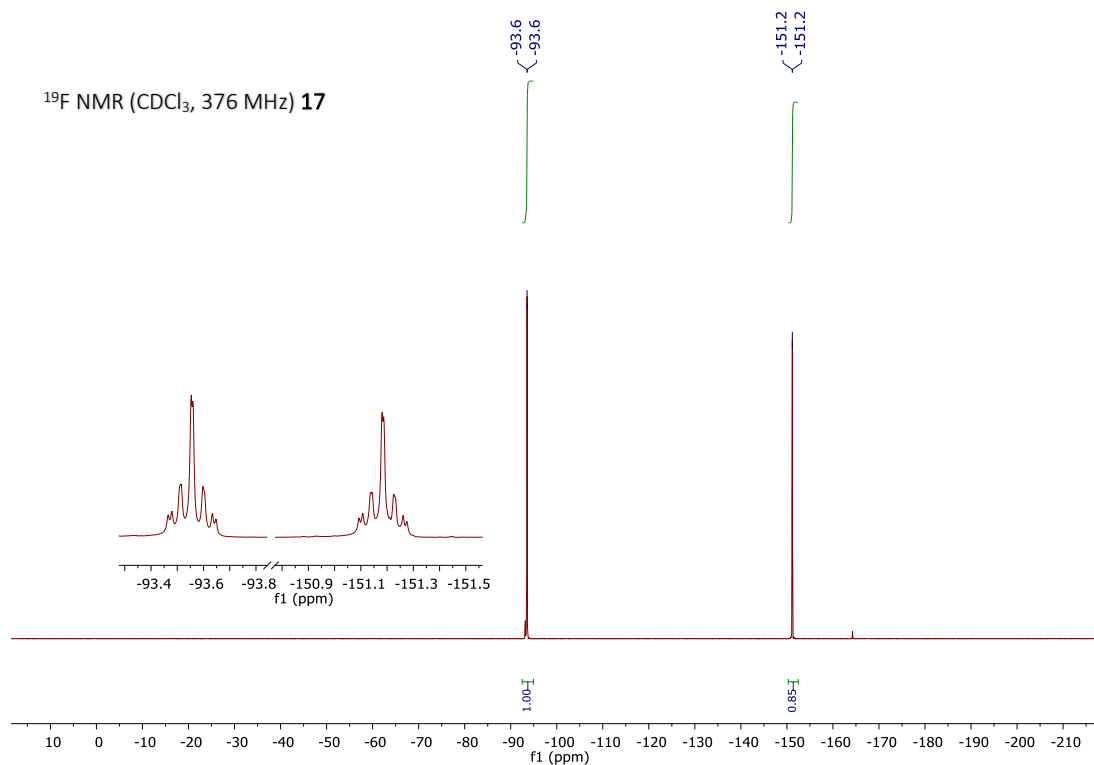

# Compound 18

$^1\text{H}$  NMR ( $\text{CDCl}_3$ , 500 MHz) **18**

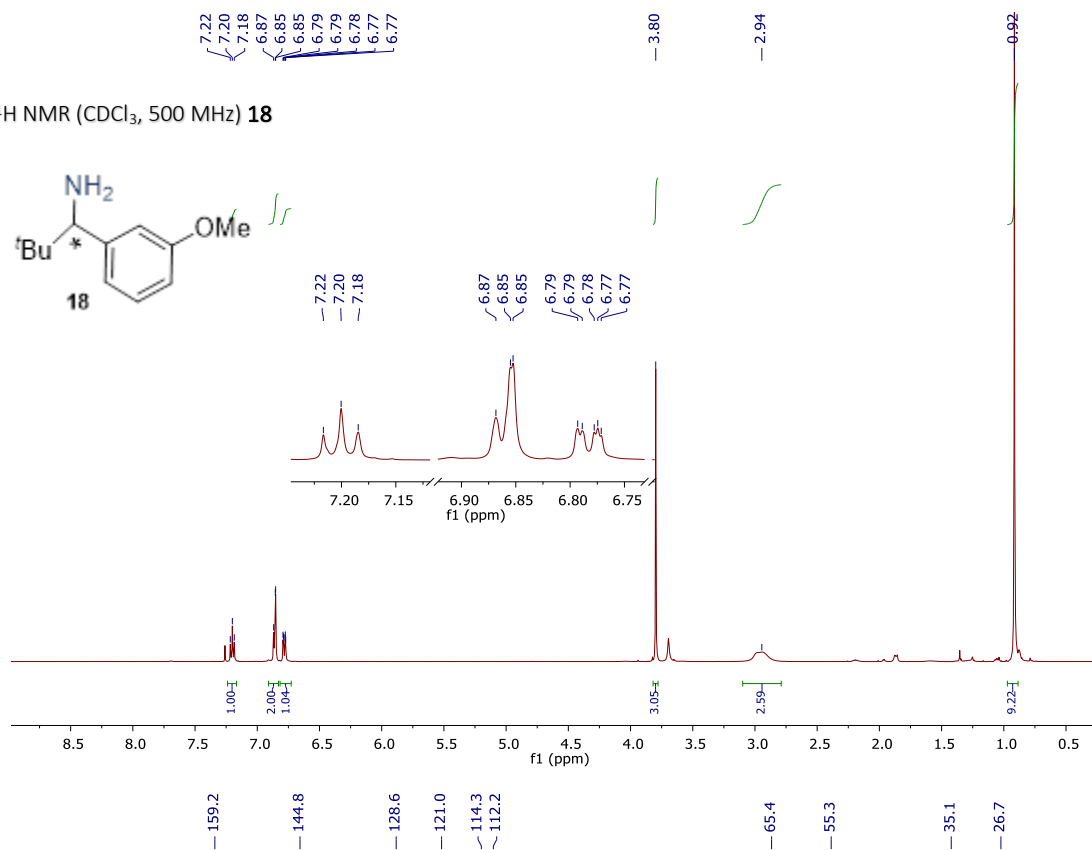

$^{13}\text{C}\{^1\text{H}\}$  NMR ( $\text{CDCl}_3$ , 125 MHz) **18**

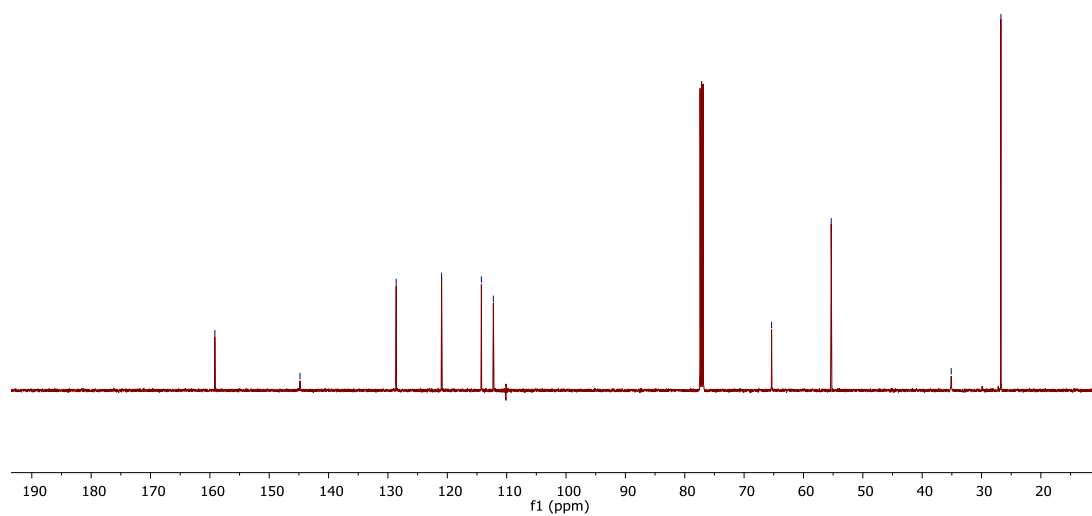

## 2. NMR spectra and HPLC chromatograms for the Grignard additions screening

$^1\text{H}$  NMR (Table 4, entry 1)

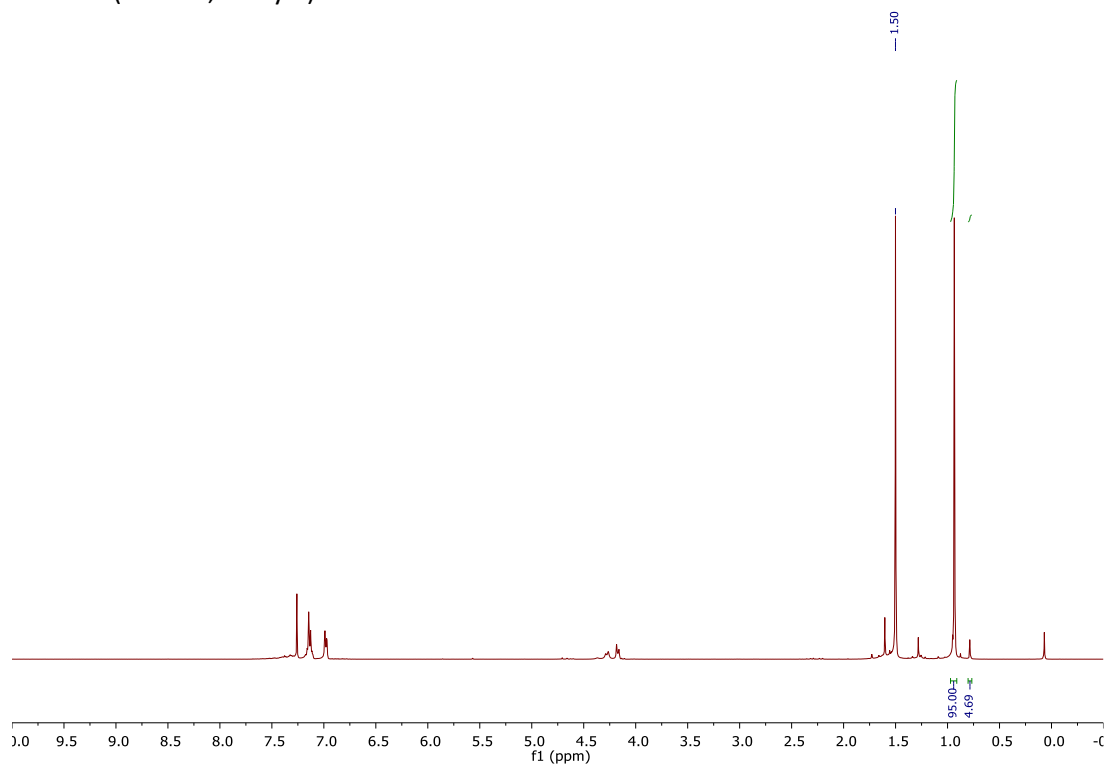

$^1\text{H}$  NMR (Table 4, entry 2)

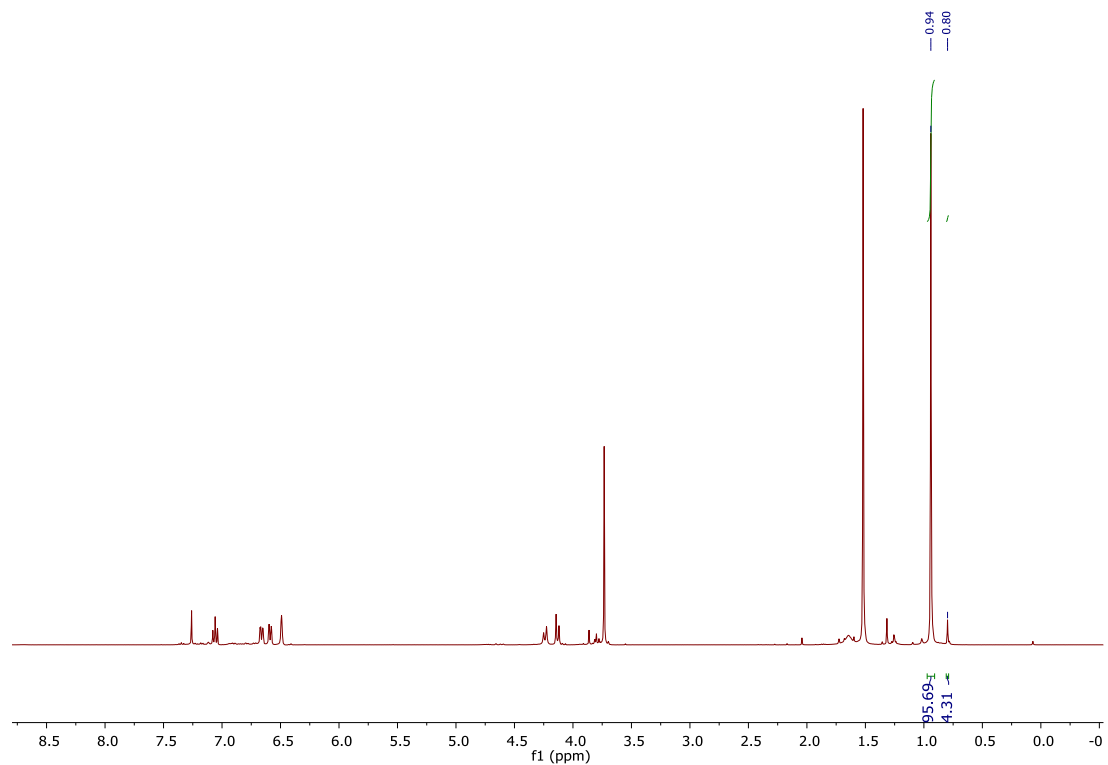

HPLC chromatogram (Table 4, entry 3)

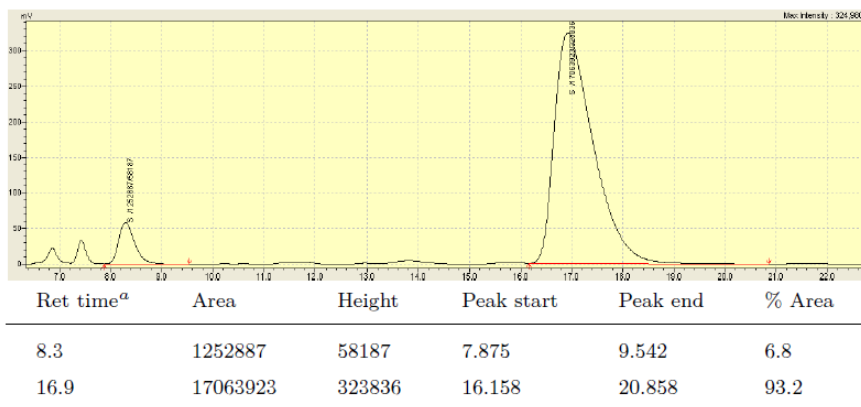

<sup>a</sup>0.5% *i*-PrOH

HPLC (Kromasil 5-CelluCoat RP, 0.46 cm × 25 cm, n-hexane/*iso*-propanol = 99.5/0.5, flow rate = 1.0 mL/min, λ = 220 nm) tR = 8.3 min (minor), 16.9 min (major).

<sup>1</sup>H NMR (Table 4, entry 4)

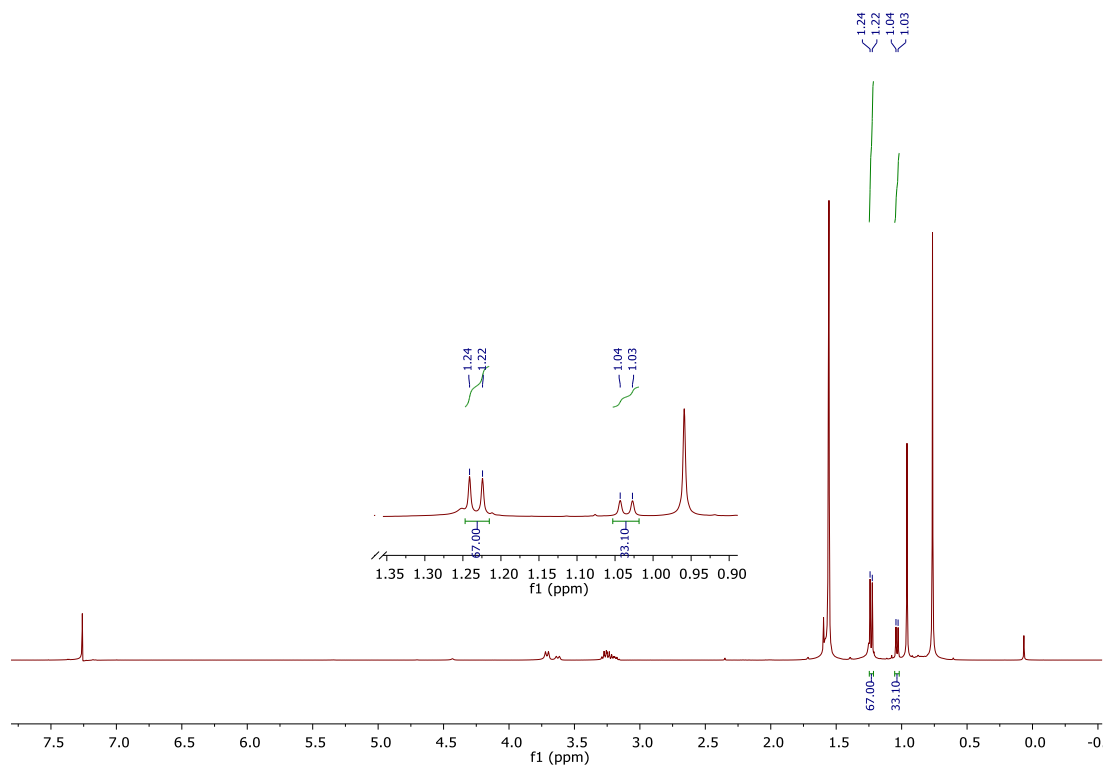



HPLC chromatogram (Table 4, entry 6)

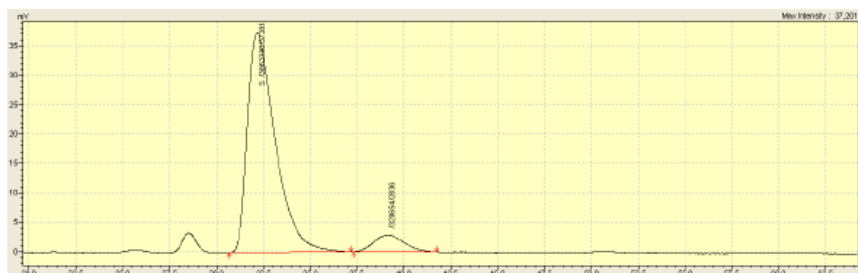

| Ret time <sup>a</sup> | Area    | Height | Peak start | Peak end | % Area |
|-----------------------|---------|--------|------------|----------|--------|
| 32.2                  | 3863336 | 37381  | 30.692     | 37.15    | 92.3   |
| 39.1                  | 320654  | 2836   | 37.292     | 41.733   | 7.7    |

<sup>a</sup>0.2% *i*-PrOH

HPLC (Kromasil 5-CelluCoat RP, 0.46 cm × 25 cm, n-hexane/*iso*-propanol = 98.8/0.2, flow rate = 1.0 mL/min, λ = 220 nm) tR = 32.2 min (major), 39.1 min (minor).

<sup>1</sup>H NMR (Table 4, entry 7)

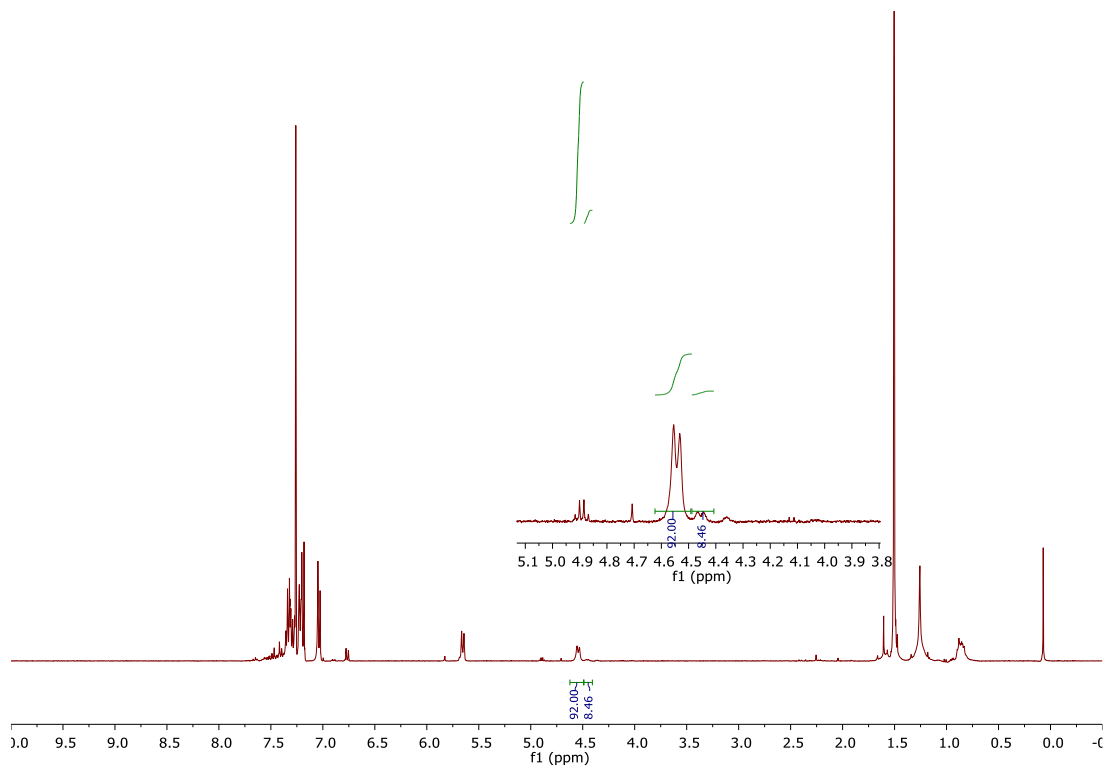

HPLC chromatogram Table 4, entry 8

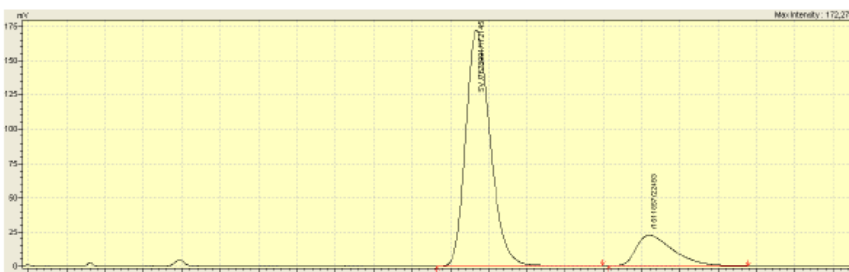

| Ret time <sup>a</sup> | Area    | Height | Peak start | Peak end | % Area |
|-----------------------|---------|--------|------------|----------|--------|
| 16.7                  | 7678991 | 172145 | 15.667     | 19.975   | 81.0   |
| 21.2                  | 1511857 | 22493  | 20.142     | 23.783   | 15.9   |

<sup>a</sup>2% *i*-PrOH

HPLC (Kromasil 5-CelluCoat RP, 0.46 cm × 25 cm, n-hexane/*iso*-propanol = 98/2, flow rate = 1.0 mL/min, λ = 220 nm) tR = 16.7 min (major), 21.2 min (minor).

HPLC chromatogram (Table 4, entry 9)

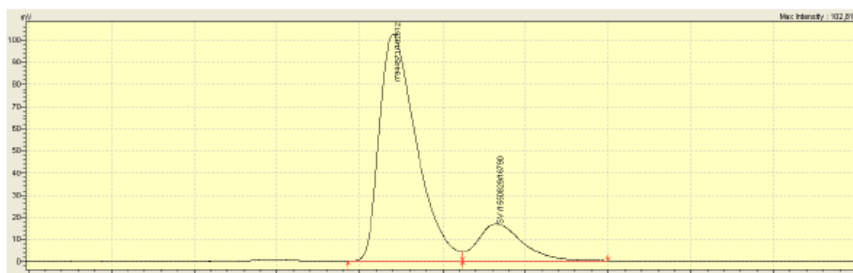

| Ret time <sup>a</sup> | Area    | Height | Peak start | Peak end | % Area |
|-----------------------|---------|--------|------------|----------|--------|
| 23.5                  | 7944571 | 102612 | 22.15      | 25.608   | 83.7   |
| 26.6                  | 1550829 | 16790  | 25.608     | 30       | 16.3   |

<sup>a</sup>0.5% *i*-PrOH

HPLC (Kromasil 5-CelluCoat RP, 0.46 cm × 25 cm, n-hexane/*iso*-propanol = 99.5/0.5, flow rate = 1.0 mL/min, λ = 220 nm) tR = 23.5 min (major), 26.6 min (minor).

<sup>1</sup>H NMR (Table 4, entry 10)

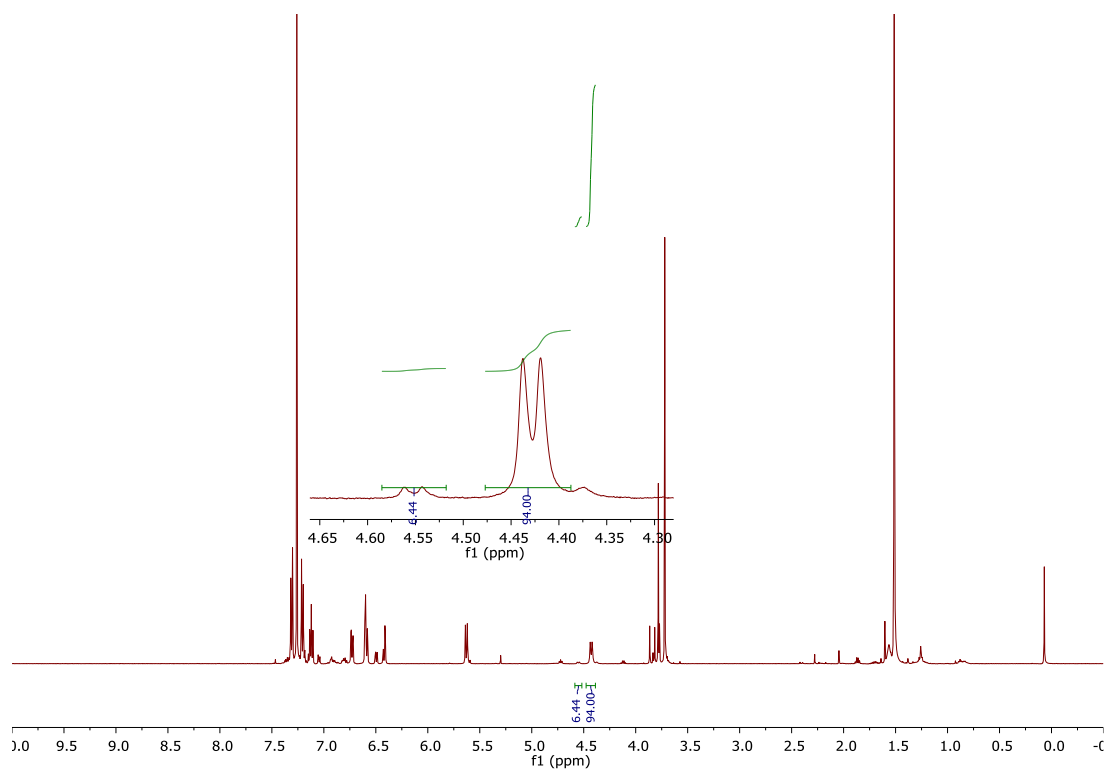

### 3. HRMS spectra Compound (S)-1

## Display Report

#### Analysis Info

Analysis Name D:\Data\RawData\Azamat\KTH\Batch\_2\_final\M1.d  
Method MS\_fullscan\_positive.m  
Sample Name NaFormate  
Comment

Acquisition Date 8/22/2021 12:47:18 PM

Operator Demo User  
Instrument impact II 1825265.10235

#### Acquisition Parameter

|             |          |                      |          |                  |           |
|-------------|----------|----------------------|----------|------------------|-----------|
| Source Type | ESI      | Ion Polarity         | Positive | Set Nebulizer    | 2.0 Bar   |
| Focus       | Active   | Set Capillary        | 3500 V   | Set Dry Heater   | 250 °C    |
| Scan Begin  | 150 m/z  | Set End Plate Offset | -400 V   | Set Dry Gas      | 8.0 l/min |
| Scan End    | 1000 m/z | Set Charging Voltage | 2000 V   | Set Divert Valve | Waste     |
|             |          | Set Corona           | 4000 nA  | Set APCI Heater  | 200 °C    |

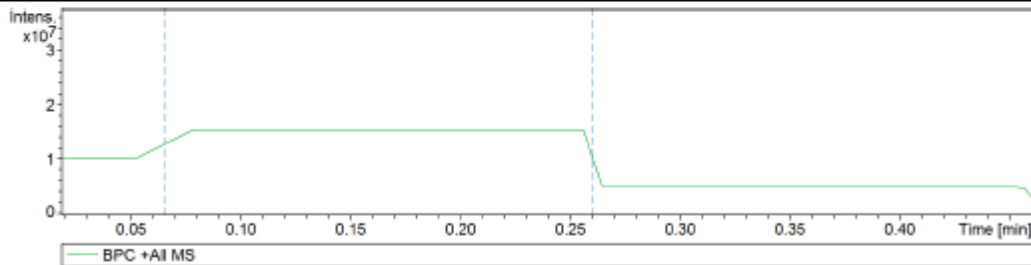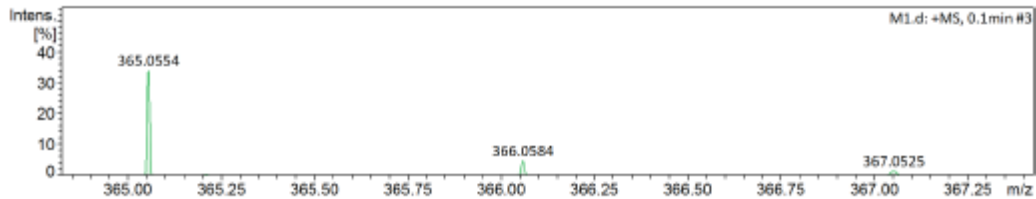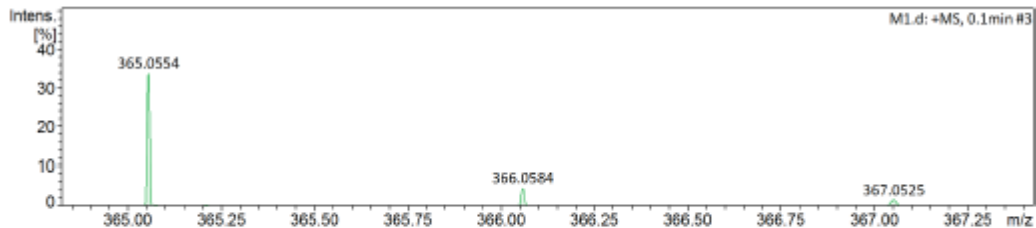

M1.d

Bruker Compass DataAnalysis 4.4

printed: 8/22/2021 5:58:37 PM

by: demo

Page 1 of 1

Compound (R)-1

### Display Report

**Analysis Info**

Analysis Name D:\Data\RawData\Azamat\KTH\Batch\_2\_final\M2.d  
Method MS\_fullscan\_positive.m  
Sample Name NaFormate  
Comment

Acquisition Date 8/22/2021 1:06:27 PM

Operator Demo User  
Instrument impact II 1825265.10235

**Acquisition Parameter**

|             |          |                      |          |                  |           |
|-------------|----------|----------------------|----------|------------------|-----------|
| Source Type | ESI      | Ion Polarity         | Positive | Set Nebulizer    | 2.0 Bar   |
| Focus       | Active   | Set Capillary        | 3500 V   | Set Dry Heater   | 250 °C    |
| Scan Begin  | 150 m/z  | Set End Plate Offset | -400 V   | Set Dry Gas      | 8.0 l/min |
| Scan End    | 1000 m/z | Set Charging Voltage | 2000 V   | Set Divert Valve | Waste     |
|             |          | Set Corona           | 4000 nA  | Set APCI Heater  | 200 °C    |

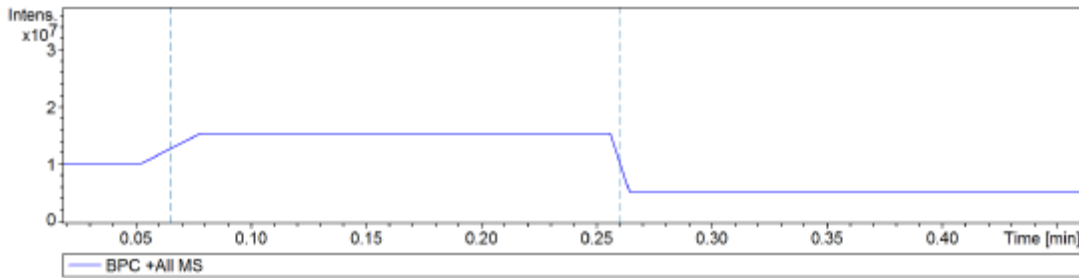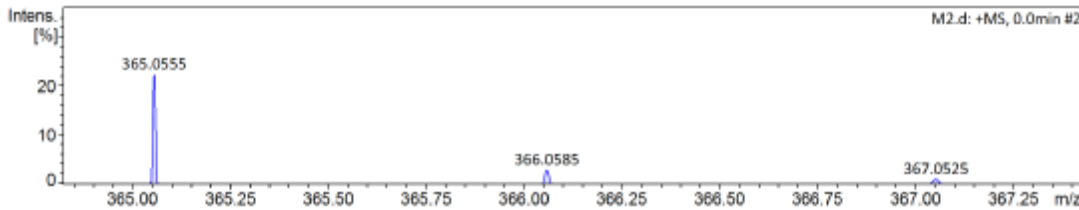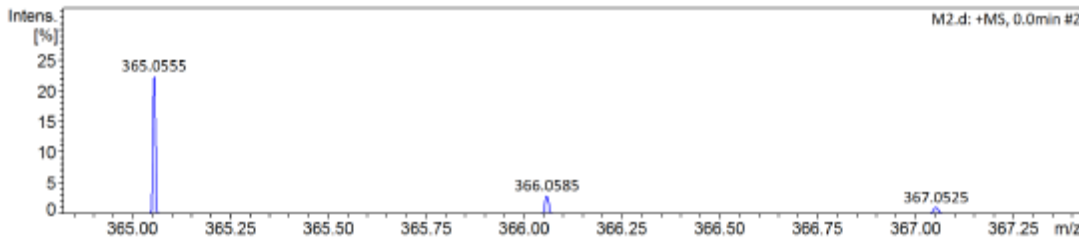

M2.d

Bruker Compass DataAnalysis 4.4

printed: 8/22/2021 6:00:11 PM

by: demo

Page 1 of 1

Compound (S)-2

### Display Report

**Analysis Info**

Analysis Name D:\Data\RawData\Azamat\KTH\Batch\_2\_final\M3.d  
Method MS\_fullscan\_positive.m  
Sample Name NaFormate  
Comment

Acquisition Date 8/22/2021 1:08:57 PM

Operator Demo User  
Instrument impact II 1825265.10235

**Acquisition Parameter**

|             |          |                      |          |                  |           |
|-------------|----------|----------------------|----------|------------------|-----------|
| Source Type | ESI      | Ion Polarity         | Positive | Set Nebulizer    | 2.0 Bar   |
| Focus       | Active   | Set Capillary        | 3500 V   | Set Dry Heater   | 250 °C    |
| Scan Begin  | 150 m/z  | Set End Plate Offset | -400 V   | Set Dry Gas      | 8.0 l/min |
| Scan End    | 1000 m/z | Set Charging Voltage | 2000 V   | Set Divert Valve | Waste     |
|             |          | Set Corona           | 4000 nA  | Set APCI Heater  | 200 °C    |

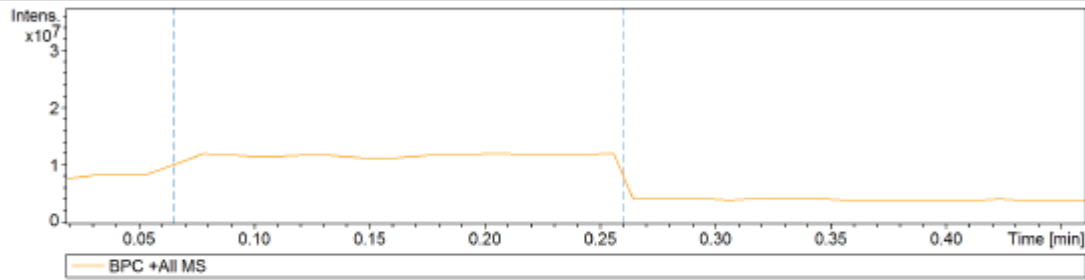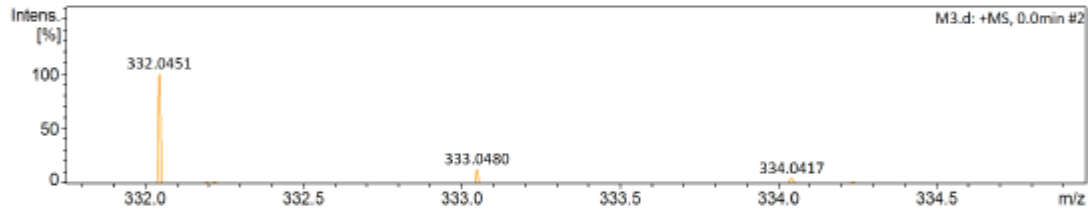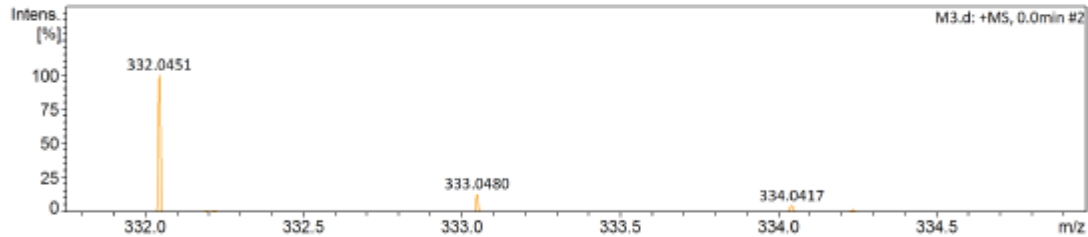

M3.d

Bruker Compass DataAnalysis 4.4

printed: 8/22/2021 6:01:46 PM

by: demo

Page 1 of 1

Compound (S)-3

### Display Report

**Analysis Info**

Analysis Name D:\Data\RawData\Azamat\KTH\Batch\_2\_final\M4.d  
Method MS\_fullscan\_positive.m  
Sample Name NaFormate  
Comment

Acquisition Date 8/22/2021 12:00:36 PM  
Operator Demo User  
Instrument impact II 1825285.10235

**Acquisition Parameter**

|             |          |                      |          |                  |           |
|-------------|----------|----------------------|----------|------------------|-----------|
| Source Type | ESI      | Ion Polarity         | Positive | Set Nebulizer    | 2.0 Bar   |
| Focus       | Active   | Set Capillary        | 3500 V   | Set Dry Heater   | 250 °C    |
| Scan Begin  | 150 m/z  | Set End Plate Offset | -400 V   | Set Dry Gas      | 8.0 l/min |
| Scan End    | 1000 m/z | Set Charging Voltage | 2000 V   | Set Divert Valve | Waste     |
|             |          | Set Corona           | 4000 nA  | Set APCI Heater  | 200 °C    |

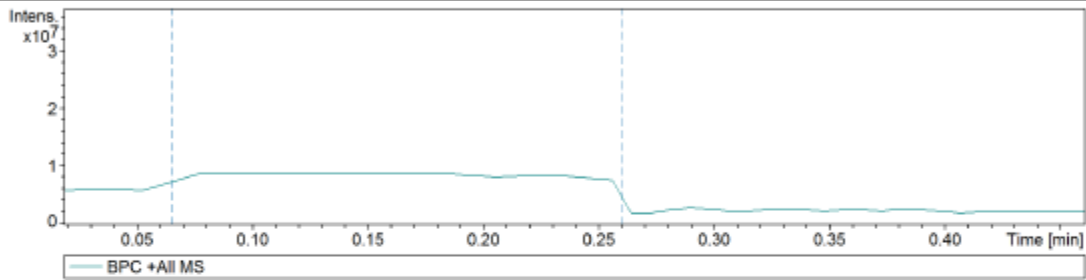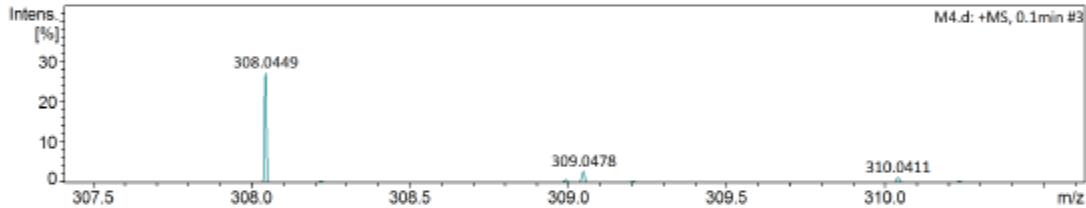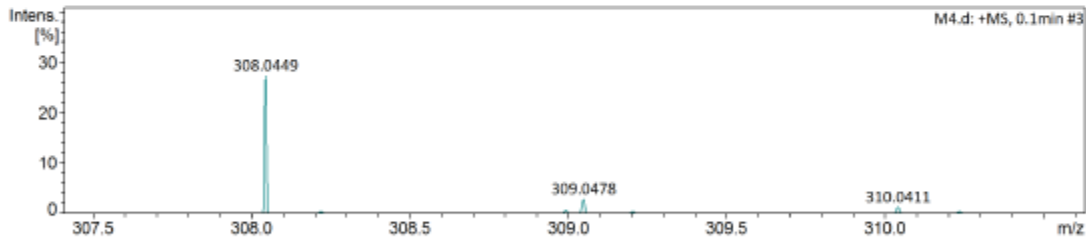

M4.d

Bruker Compass DataAnalysis 4.4

printed: 8/22/2021 6:03:04 PM

by: demo

Page 1 of 1

Compound (R)-3

Display Report

Analysis Info

Analysis Name D:\Data\RawData\Azamat\KTH\Batch\_2\_final\M5.d  
Method MS\_fullscan\_positive.m  
Sample Name NaFormate  
Comment

Acquisition Date 8/22/2021 12:41:50 PM  
Operator Demo User  
Instrument impact II 1825285.10235

Acquisition Parameter

|             |          |                      |          |                  |           |
|-------------|----------|----------------------|----------|------------------|-----------|
| Source Type | ESI      | Ion Polarity         | Positive | Set Nebulizer    | 2.0 Bar   |
| Focus       | Active   | Set Capillary        | 3500 V   | Set Dry Heater   | 250 °C    |
| Scan Begin  | 150 m/z  | Set End Plate Offset | -400 V   | Set Dry Gas      | 8.0 l/min |
| Scan End    | 1000 m/z | Set Charging Voltage | 2000 V   | Set Divert Valve | Waste     |
|             |          | Set Corona           | 4000 nA  | Set APCI Heater  | 200 °C    |

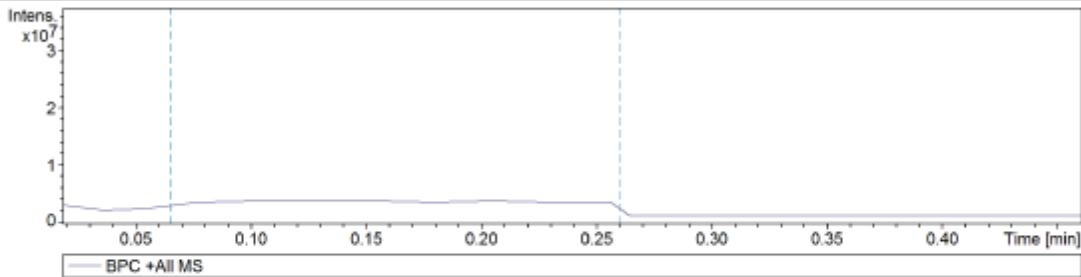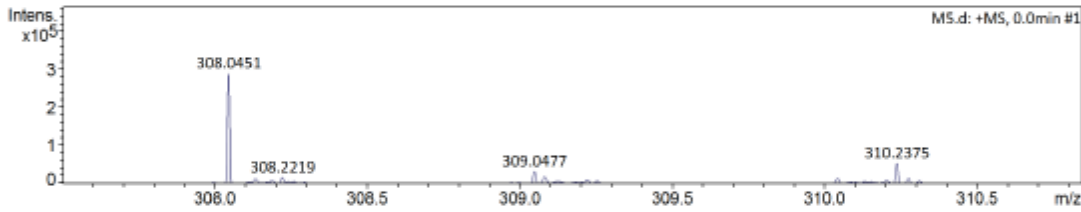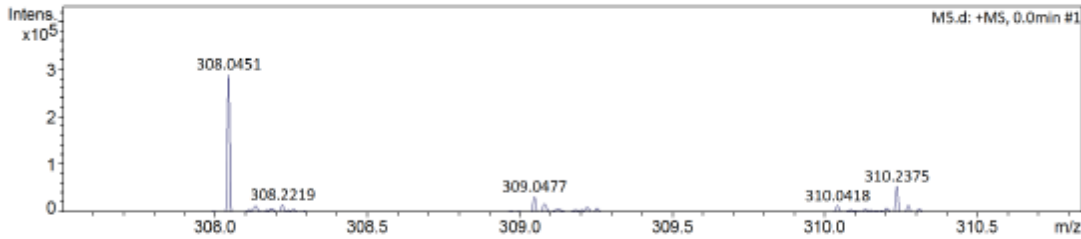

M5.d

Bruker Compass DataAnalysis 4.4

printed: 8/22/2021 8:06:18 PM

by: demo

Page 1 of 1



Compound (S)-4

Display Report

Analysis Info

Analysis Name D:\Data\RawData\Azamat\KTH\Batch\_2\_final\M6.d  
Method MS\_fullscan\_positive.m  
Sample Name NaFormate  
Comment

Acquisition Date 8/22/2021 12:34:27 PM

Operator Demo User  
Instrument impact II 1825265.10235

Acquisition Parameter

|             |          |                      |          |                  |           |
|-------------|----------|----------------------|----------|------------------|-----------|
| Source Type | ESI      | Ion Polarity         | Positive | Set Nebulizer    | 2.0 Bar   |
| Focus       | Active   | Set Capillary        | 3500 V   | Set Dry Heater   | 250 °C    |
| Scan Begin  | 150 m/z  | Set End Plate Offset | -400 V   | Set Dry Gas      | 8.0 l/min |
| Scan End    | 1000 m/z | Set Charging Voltage | 2000 V   | Set Divert Valve | Waste     |
|             |          | Set Corona           | 4000 nA  | Set APCI Heater  | 200 °C    |

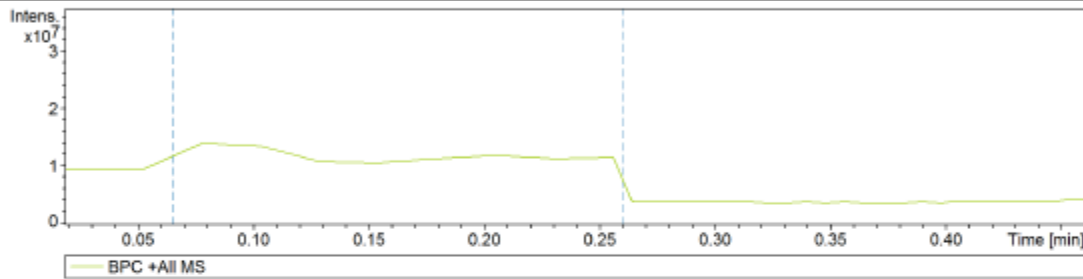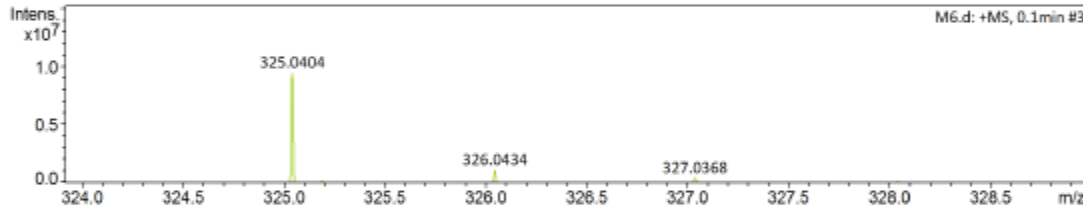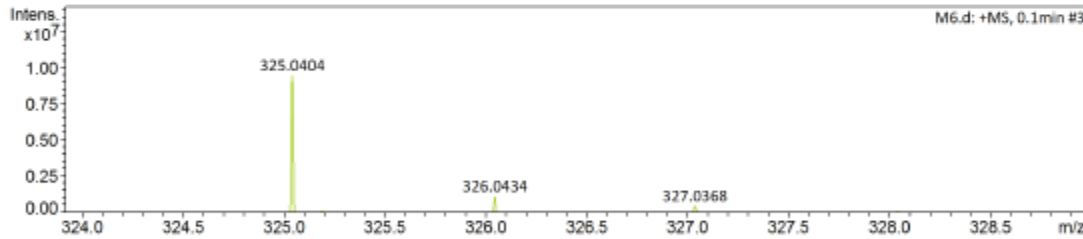

Compound (S)-5

Display Report

Analysis Info

Analysis Name D:\Data\RawData\Azamat\KTH\Batch\_2\_final\M7.d  
Method MS\_fullscan\_positive.m  
Sample Name NaFormate  
Comment

Acquisition Date 8/22/2021 12:11:18 PM

Operator Demo User  
Instrument impact II 1825265.10235

Acquisition Parameter

|             |          |                      |          |                  |           |
|-------------|----------|----------------------|----------|------------------|-----------|
| Source Type | ESI      | Ion Polarity         | Positive | Set Nebulizer    | 2.0 Bar   |
| Focus       | Active   | Set Capillary        | 3500 V   | Set Dry Heater   | 250 °C    |
| Scan Begin  | 150 m/z  | Set End Plate Offset | -400 V   | Set Dry Gas      | 8.0 l/min |
| Scan End    | 1000 m/z | Set Charging Voltage | 2000 V   | Set Divert Valve | Waste     |
|             |          | Set Corona           | 4000 nA  | Set APCI Heater  | 200 °C    |

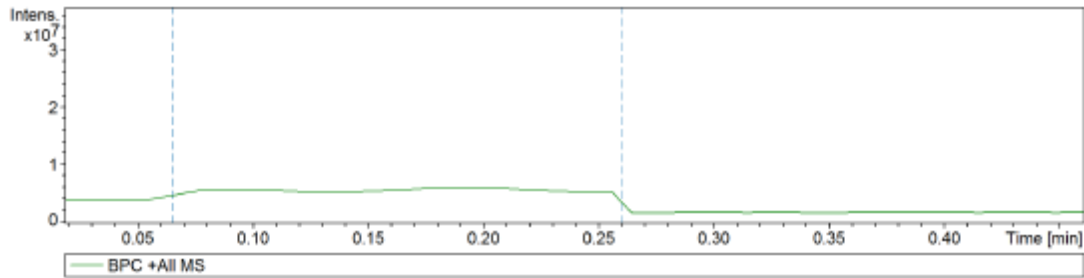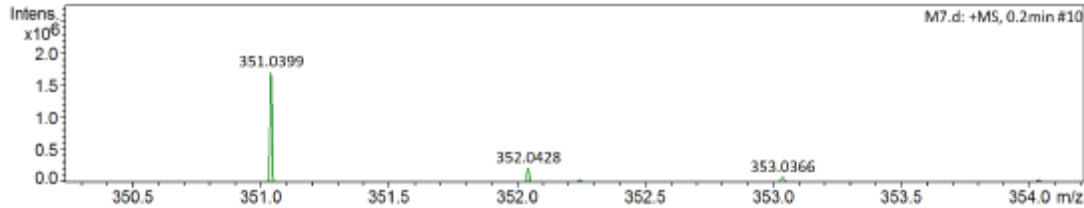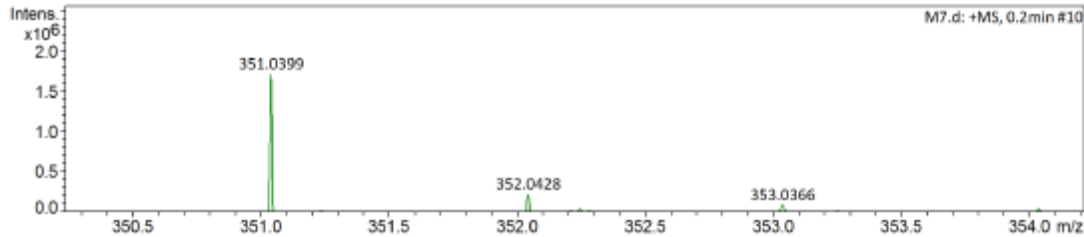

M7.d

Bruker Compass DataAnalysis 4.4

printed: 8/22/2021 6:09:16 PM

by: demo

Page 1 of 1

Compound (S)-7

### Display Report

**Analysis Info**

Analysis Name D:\Data\RawData\Azamat\KTH\Batch\_2\_final\M8.d  
Method MS\_fullscan\_positive.m  
Sample Name NaFormate  
Comment

Acquisition Date 8/22/2021 12:31:53 PM

Operator Demo User  
Instrument impact II 1825285.10235

**Acquisition Parameter**

|             |          |                      |          |                  |           |
|-------------|----------|----------------------|----------|------------------|-----------|
| Source Type | ESI      | Ion Polarity         | Positive | Set Nebulizer    | 2.0 Bar   |
| Focus       | Active   | Set Capillary        | 3500 V   | Set Dry Heater   | 250 °C    |
| Scan Begin  | 150 m/z  | Set End Plate Offset | -400 V   | Set Dry Gas      | 8.0 l/min |
| Scan End    | 1000 m/z | Set Charging Voltage | 2000 V   | Set Divert Valve | Waste     |
|             |          | Set Corona           | 4000 nA  | Set APCI Heater  | 200 °C    |

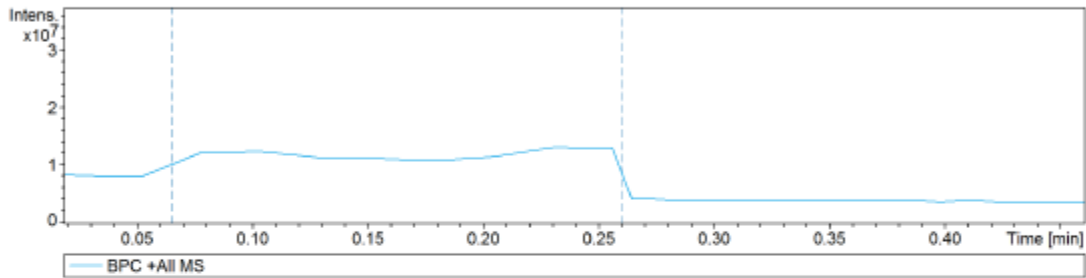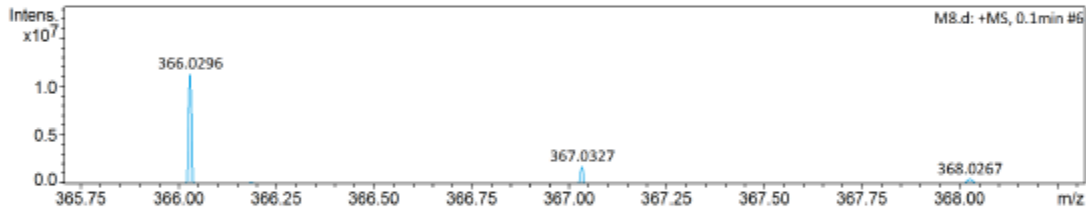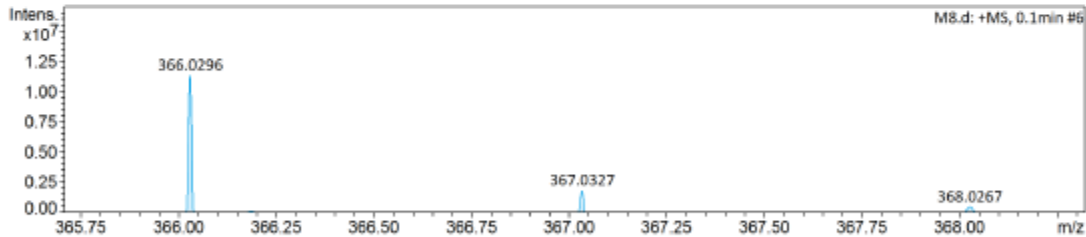

M8.d

Bruker Compass DataAnalysis 4.4

printed: 8/22/2021 6:10:11 PM

by: demo

Page 1 of 1

## Display Report

**Analysis Info**

Analysis Name D:\Data\RawData\Azamat\KTH\Batch\_2\_final\M10.d  
 Method MS\_fullscan\_positive.m  
 Sample Name NaFormate  
 Comment

Acquisition Date 8/22/2021 12:08:39 PM

Operator Demo User  
 Instrument impact II 1825265.10235

**Acquisition Parameter**

|             |          |                      |          |                  |           |
|-------------|----------|----------------------|----------|------------------|-----------|
| Source Type | ESI      | Ion Polarity         | Positive | Set Nebulizer    | 2.0 Bar   |
| Focus       | Active   | Set Capillary        | 3500 V   | Set Dry Heater   | 250 °C    |
| Scan Begin  | 150 m/z  | Set End Plate Offset | -400 V   | Set Dry Gas      | 8.0 l/min |
| Scan End    | 1000 m/z | Set Charging Voltage | 2000 V   | Set Divert Valve | Waste     |
|             |          | Set Corona           | 4000 nA  | Set APCI Heater  | 200 °C    |

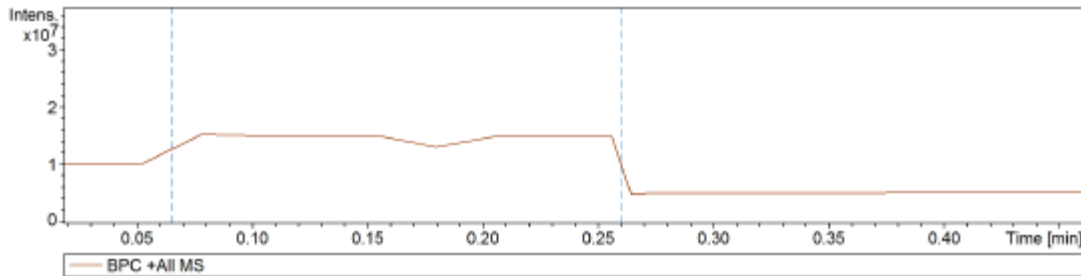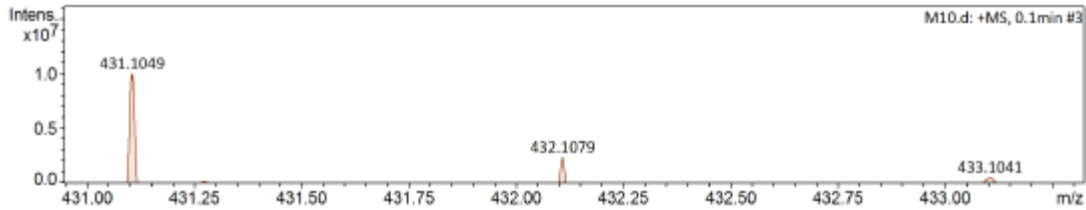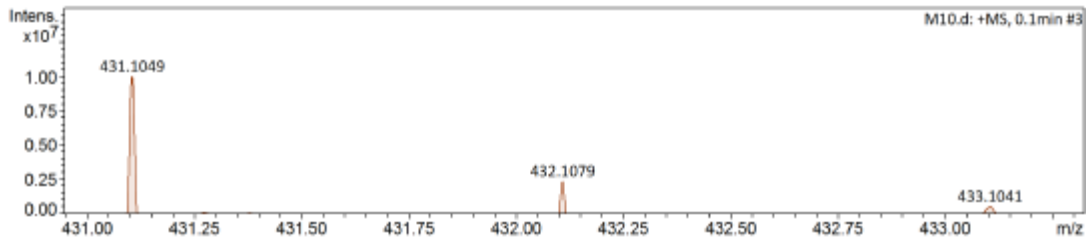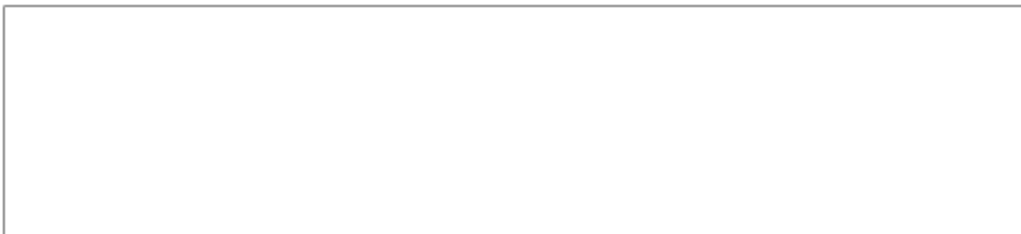

Compound 9

Display Report

Analysis Info

Analysis Name D:\Data\RawData\Azamat\KTH\Batch\_2\_final\M11.d  
Method MS\_fullscan\_positive.m  
Sample Name NaFormate  
Comment

Acquisition Date 8/22/2021 12:54:55 PM  
Operator Demo User  
Instrument impact II 1825285.10235

Acquisition Parameter

|             |          |                      |          |                  |           |
|-------------|----------|----------------------|----------|------------------|-----------|
| Source Type | ESI      | Ion Polarity         | Positive | Set Nebulizer    | 2.0 Bar   |
| Focus       | Active   | Set Capillary        | 3500 V   | Set Dry Heater   | 250 °C    |
| Scan Begin  | 150 m/z  | Set End Plate Offset | -400 V   | Set Dry Gas      | 8.0 l/min |
| Scan End    | 1000 m/z | Set Charging Voltage | 2000 V   | Set Divert Valve | Waste     |
|             |          | Set Corona           | 4000 nA  | Set APCI Heater  | 200 °C    |

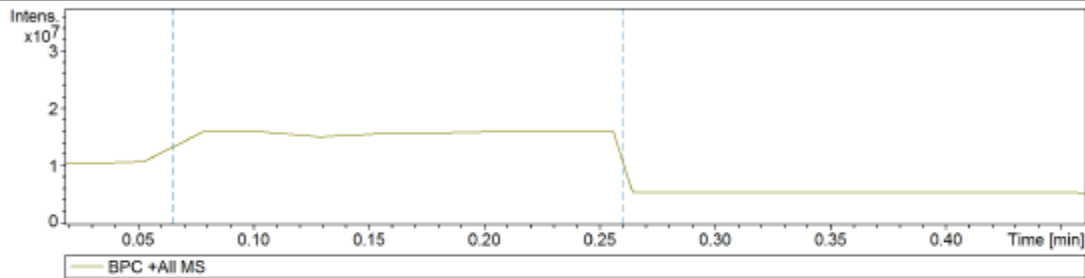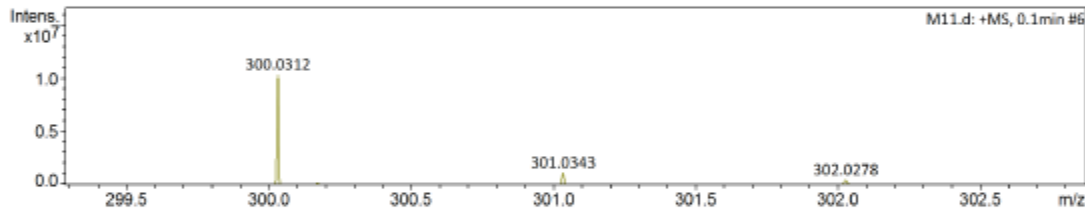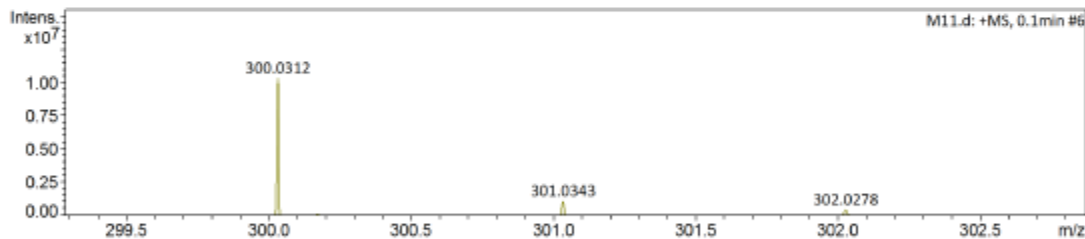

## Display Report

**Analysis Info**

Analysis Name D:\Data\RawData\Azamat\KTH\Batch\_2\_final\M12.d  
 Method MS\_fullscan\_positive.m  
 Sample Name NaFormate  
 Comment

Acquisition Date 8/22/2021 12:03:09 PM

Operator Demo User  
 Instrument impact II 1825265.10235

**Acquisition Parameter**

|             |          |                      |          |                  |           |
|-------------|----------|----------------------|----------|------------------|-----------|
| Source Type | ESI      | Ion Polarity         | Positive | Set Nebulizer    | 2.0 Bar   |
| Focus       | Active   | Set Capillary        | 3500 V   | Set Dry Heater   | 250 °C    |
| Scan Begin  | 150 m/z  | Set End Plate Offset | -400 V   | Set Dry Gas      | 8.0 l/min |
| Scan End    | 1000 m/z | Set Charging Voltage | 2000 V   | Set Divert Valve | Waste     |
|             |          | Set Corona           | 4000 nA  | Set APCI Heater  | 200 °C    |

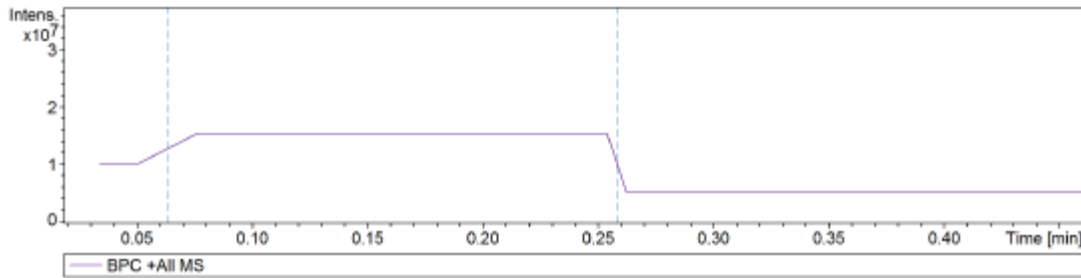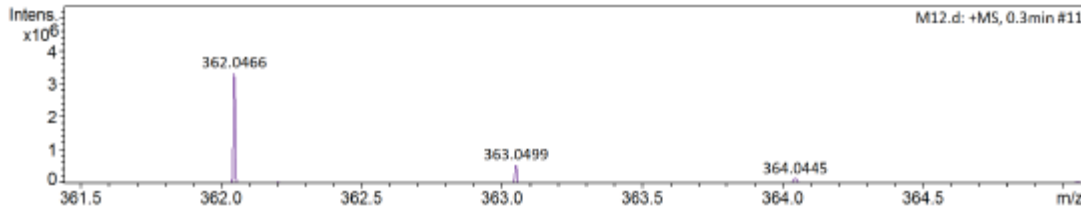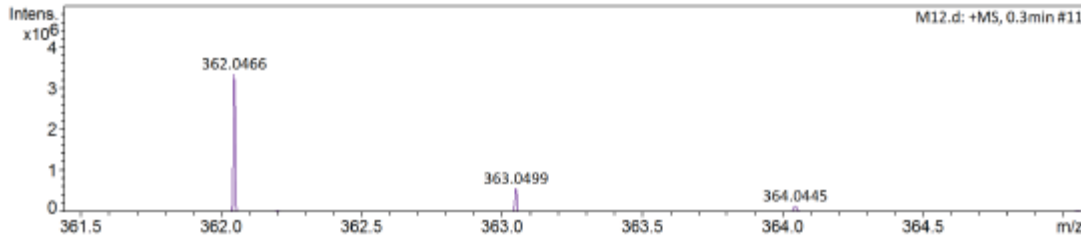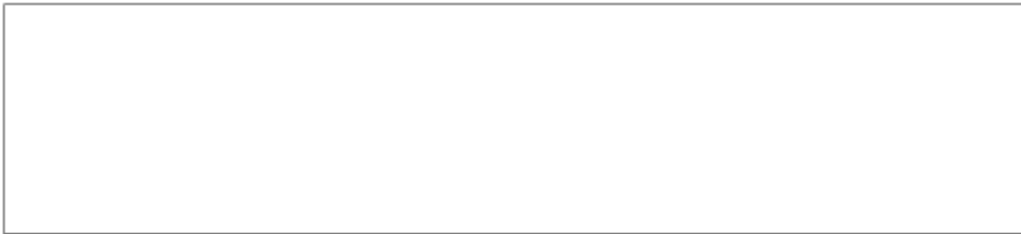

## Display Report

**Analysis Info**

|               |                                                |                  |                         |
|---------------|------------------------------------------------|------------------|-------------------------|
| Analysis Name | D:\Data\RawData\Azamat\KTH\Batch_2_final\M13.d | Acquisition Date | 8/22/2021 12:37:33 PM   |
| Method        | MS_fullscan_positive.m                         | Operator         | Demo User               |
| Sample Name   | NaFormate                                      | Instrument       | impact II 1825265.10235 |
| Comment       |                                                |                  |                         |

**Acquisition Parameter**

|             |          |                      |          |                  |           |
|-------------|----------|----------------------|----------|------------------|-----------|
| Source Type | ESI      | Ion Polarity         | Positive | Set Nebulizer    | 2.0 Bar   |
| Focus       | Active   | Set Capillary        | 3500 V   | Set Dry Heater   | 250 °C    |
| Scan Begin  | 150 m/z  | Set End Plate Offset | -400 V   | Set Dry Gas      | 8.0 l/min |
| Scan End    | 1000 m/z | Set Charging Voltage | 2000 V   | Set Divert Valve | Waste     |
|             |          | Set Corona           | 4000 nA  | Set APCI Heater  | 200 °C    |

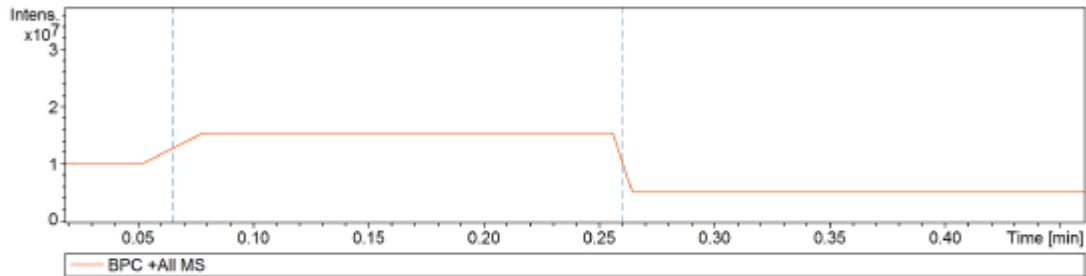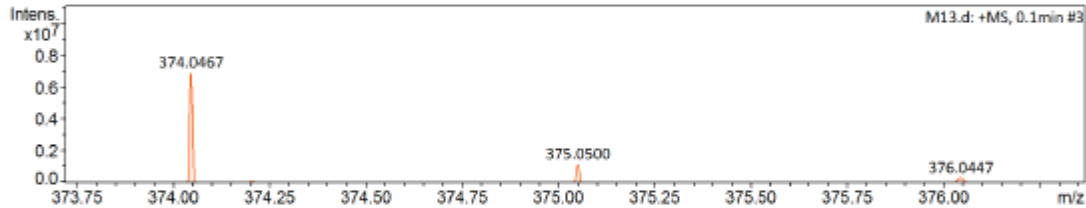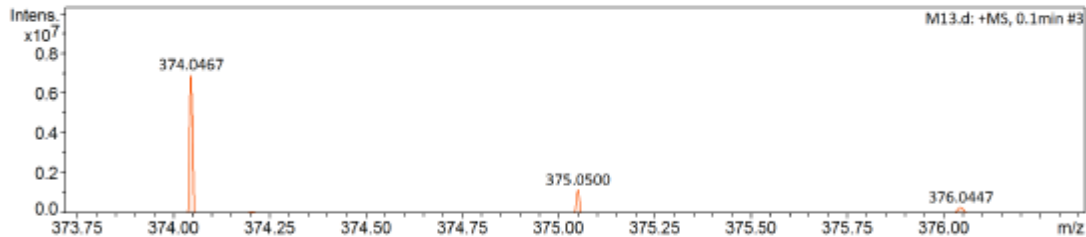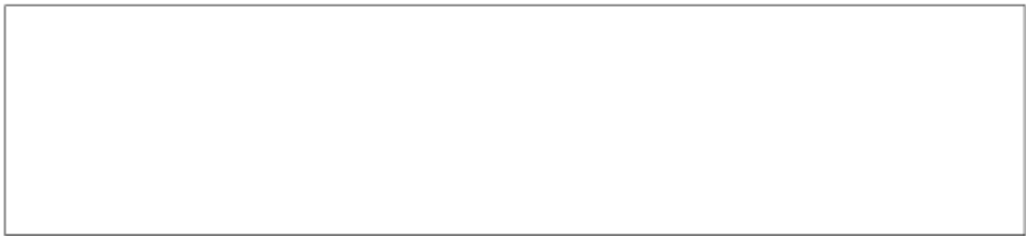

Compound Rac-12

### Display Report

**Analysis Info**

Analysis Name D:\Data\RawData\Azamat\KTH\Batch\_2\_final\M14.d  
Method MS\_fullscan\_positive.m  
Sample Name NaFormate  
Comment

Acquisition Date 8/22/2021 1:03:44 PM

Operator Demo User  
Instrument impact II 1825265.10235

**Acquisition Parameter**

|             |          |                      |          |                  |           |
|-------------|----------|----------------------|----------|------------------|-----------|
| Source Type | ESI      | Ion Polarity         | Positive | Set Nebulizer    | 2.0 Bar   |
| Focus       | Active   | Set Capillary        | 3500 V   | Set Dry Heater   | 250 °C    |
| Scan Begin  | 150 m/z  | Set End Plate Offset | -400 V   | Set Dry Gas      | 8.0 l/min |
| Scan End    | 1000 m/z | Set Charging Voltage | 2000 V   | Set Divert Valve | Waste     |
|             |          | Set Corona           | 4000 nA  | Set APCI Heater  | 200 °C    |

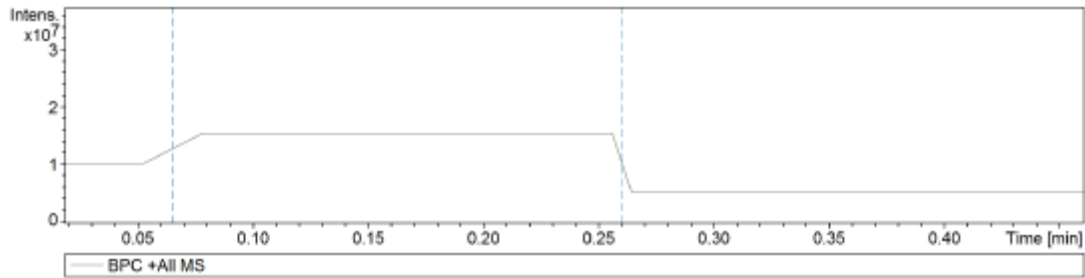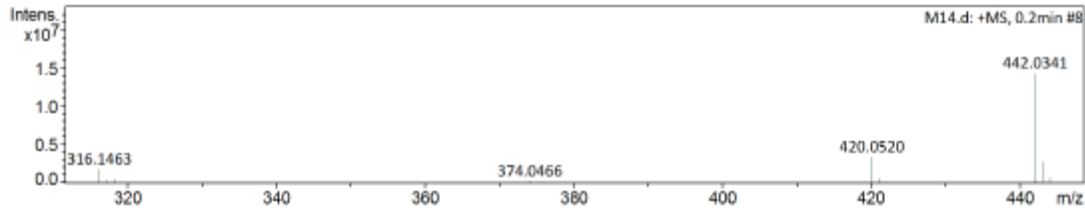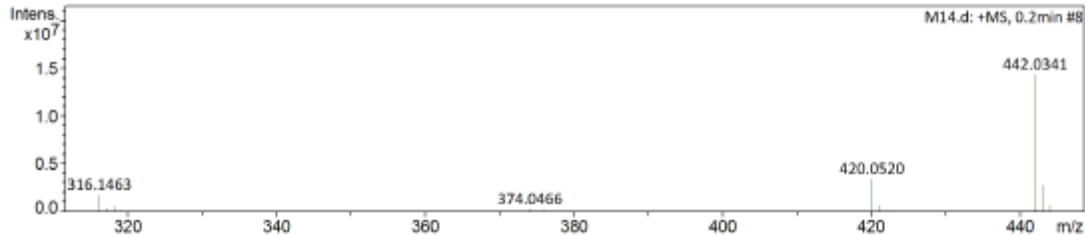



Compound (R)-13

### Display Report

**Analysis Info**

Analysis Name D:\Data\RawData\Azamat\KTH\Batch\_2\_final\M15.d  
Method MS\_fullscan\_positive.m  
Sample Name NaFormate  
Comment

Acquisition Date 8/22/2021 12:57:23 PM  
Operator Demo User  
Instrument impact II 1825285.10235

**Acquisition Parameter**

|             |          |                      |          |                  |           |
|-------------|----------|----------------------|----------|------------------|-----------|
| Source Type | ESI      | Ion Polarity         | Positive | Set Nebulizer    | 2.0 Bar   |
| Focus       | Active   | Set Capillary        | 3500 V   | Set Dry Heater   | 250 °C    |
| Scan Begin  | 150 m/z  | Set End Plate Offset | -400 V   | Set Dry Gas      | 8.0 l/min |
| Scan End    | 1000 m/z | Set Charging Voltage | 2000 V   | Set Divert Valve | Waste     |
|             |          | Set Corona           | 4000 nA  | Set APCI Heater  | 200 °C    |

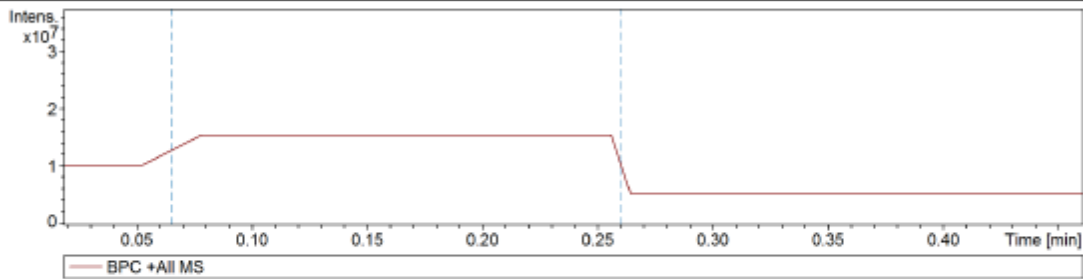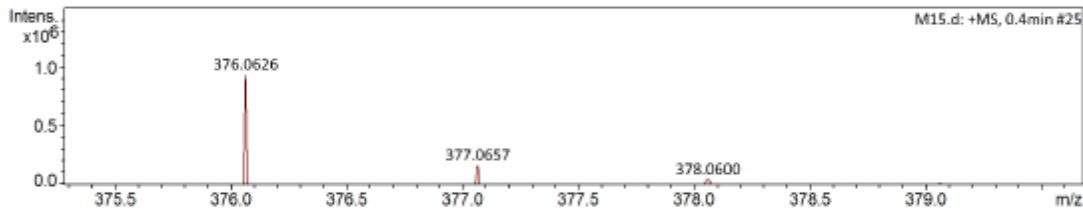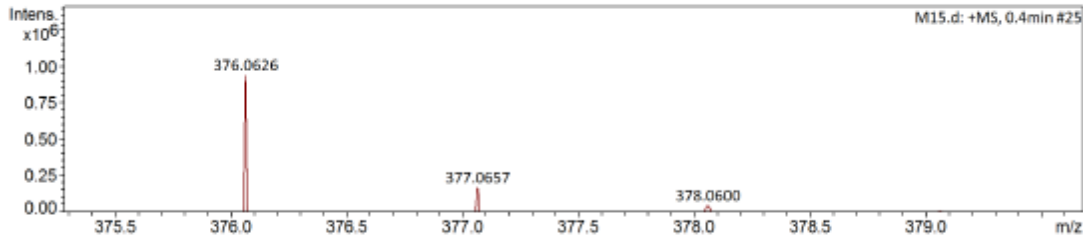

M15.d

Bruker Compass DataAnalysis 4.4

printed: 8/22/2021 6:29:29 PM

by: demo

Page 1 of 1

Compound rac-14

### Display Report

**Analysis Info**

Analysis Name D:\Data\RawData\Azamat\KTH\Batch\_2\_final\M16.d  
Method MS\_fullscan\_positive.m  
Sample Name NaFormate  
Comment

Acquisition Date 8/22/2021 12:13:59 PM

Operator Demo User  
Instrument impact II 1825265.10235

**Acquisition Parameter**

|             |          |                      |          |                  |           |
|-------------|----------|----------------------|----------|------------------|-----------|
| Source Type | ESI      | Ion Polarity         | Positive | Set Nebulizer    | 2.0 Bar   |
| Focus       | Active   | Set Capillary        | 3500 V   | Set Dry Heater   | 250 °C    |
| Scan Begin  | 150 m/z  | Set End Plate Offset | -400 V   | Set Dry Gas      | 8.0 l/min |
| Scan End    | 1000 m/z | Set Charging Voltage | 2000 V   | Set Divert Valve | Waste     |
|             |          | Set Corona           | 4000 nA  | Set APCI Heater  | 200 °C    |

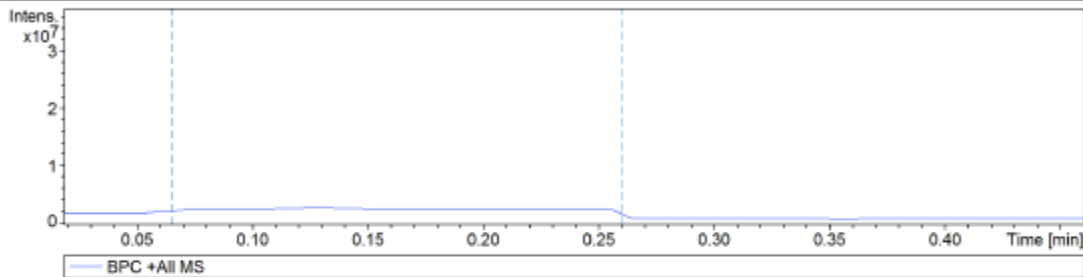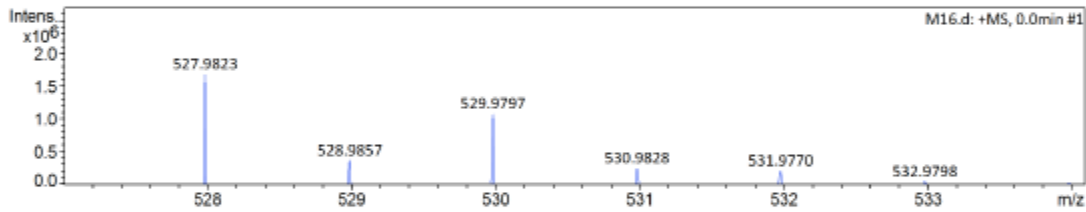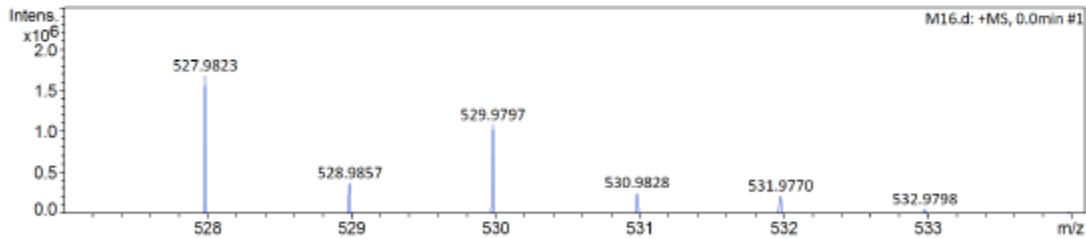

M16.d

Bruker Compass DataAnalysis 4.4

printed: 8/22/2021 6:30:31 PM

by: demo

Page 1 of 1

Compound 15

Display Report

Analysis Info

Analysis Name D:\Data\RawData\Azamat\KTH\Batch\_2\_final\M17.d  
Method MS\_fullscan\_positive.m  
Sample Name NaFormate  
Comment

Acquisition Date 8/22/2021 1:11:36 PM

Operator Demo User  
Instrument impact II 1825265.10235

Acquisition Parameter

|             |          |                      |          |                  |           |
|-------------|----------|----------------------|----------|------------------|-----------|
| Source Type | ESI      | Ion Polarity         | Positive | Set Nebulizer    | 2.0 Bar   |
| Focus       | Active   | Set Capillary        | 3500 V   | Set Dry Heater   | 250 °C    |
| Scan Begin  | 150 m/z  | Set End Plate Offset | -400 V   | Set Dry Gas      | 8.0 l/min |
| Scan End    | 1000 m/z | Set Charging Voltage | 2000 V   | Set Divert Valve | Waste     |
|             |          | Set Corona           | 4000 nA  | Set APCI Heater  | 200 °C    |

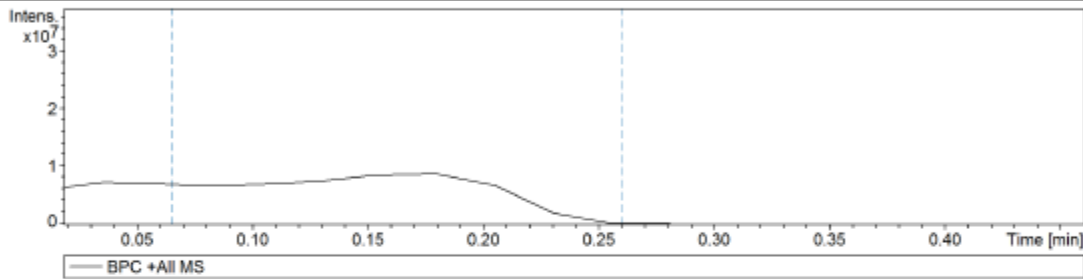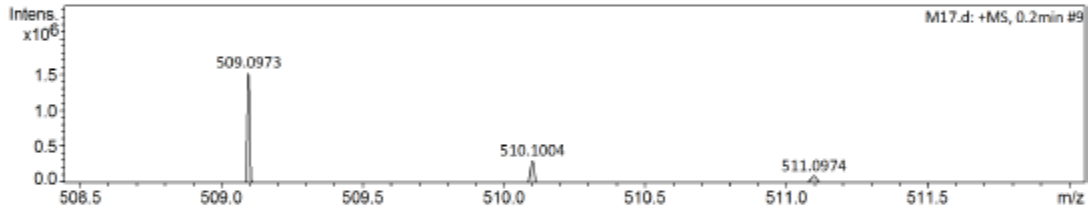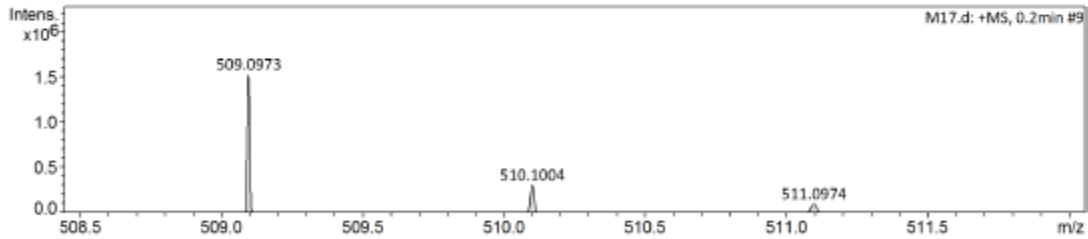

M17.d

Bruker Compass DataAnalysis 4.4

printed: 8/22/2021 6:31:54 PM

by: demo

Page 1 of 1

Compound (R)-16a

Display Report

Analysis Info

Analysis Name D:\Data\RawData\Azamat\KTH\Batch\_2\_final\M18.d  
Method MS\_fullscan\_positive.m  
Sample Name NaFormate  
Comment

Acquisition Date 8/22/2021 1:13:21 PM  
Operator Demo User  
Instrument impact II 1825265.10235

Acquisition Parameter

|             |          |                      |          |                  |           |
|-------------|----------|----------------------|----------|------------------|-----------|
| Source Type | ESI      | Ion Polarity         | Positive | Set Nebulizer    | 2.0 Bar   |
| Focus       | Active   | Set Capillary        | 3500 V   | Set Dry Heater   | 250 °C    |
| Scan Begin  | 150 m/z  | Set End Plate Offset | -400 V   | Set Dry Gas      | 8.0 l/min |
| Scan End    | 1000 m/z | Set Charging Voltage | 2000 V   | Set Divert Valve | Waste     |
|             |          | Set Corona           | 4000 nA  | Set APCI Heater  | 200 °C    |

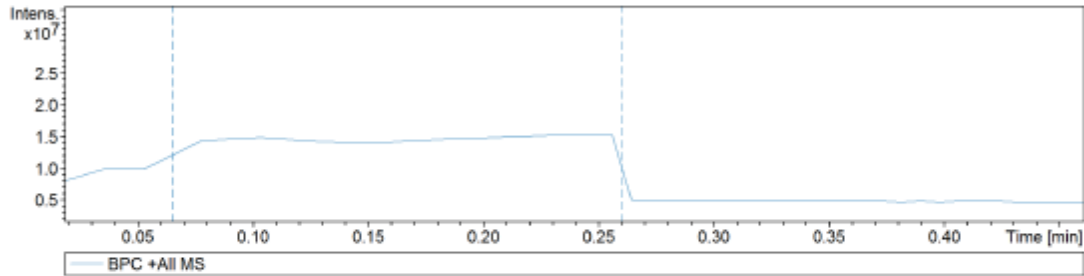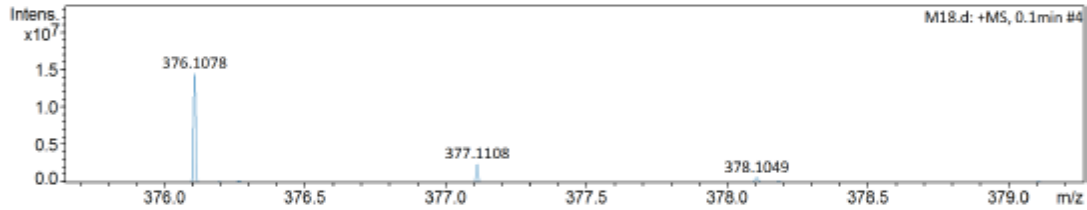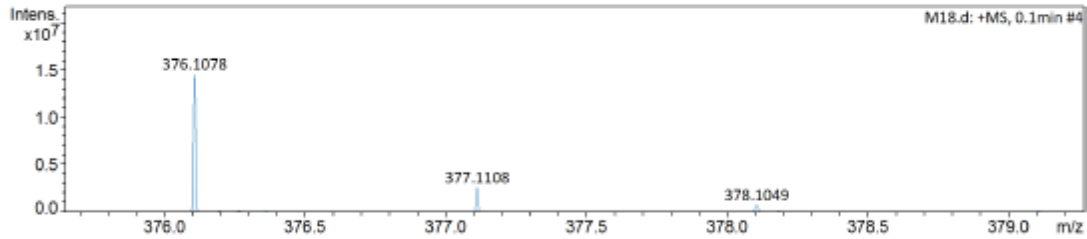

### Display Report

**Analysis Info**

Analysis Name D:\Data\RawData\Azamat\KTH\Batch\_2\_final\M1a.d  
Method MS\_fullscan\_positive.m  
Sample Name NaFormate  
Comment

Acquisition Date 8/22/2021 1:15:54 PM  
Operator Demo User  
Instrument impact II 1825265.10235

**Acquisition Parameter**

|             |          |                      |          |                  |           |
|-------------|----------|----------------------|----------|------------------|-----------|
| Source Type | ESI      | Ion Polarity         | Positive | Set Nebulizer    | 2.0 Bar   |
| Focus       | Active   | Set Capillary        | 3500 V   | Set Dry Heater   | 250 °C    |
| Scan Begin  | 150 m/z  | Set End Plate Offset | -400 V   | Set Dry Gas      | 8.0 l/min |
| Scan End    | 1000 m/z | Set Charging Voltage | 2000 V   | Set Divert Valve | Waste     |
|             |          | Set Corona           | 4000 nA  | Set APCI Heater  | 200 °C    |

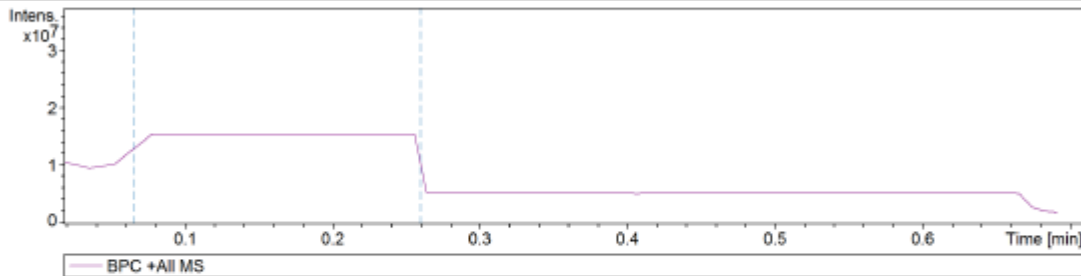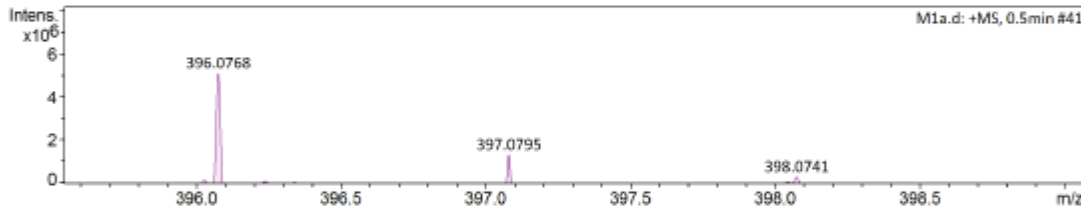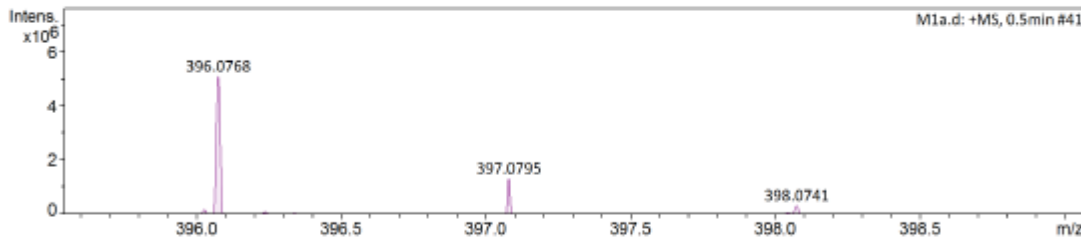

Compound (R)-16c

Display Report

Analysis Info

Analysis Name D:\Data\RawData\Azamat\KTH\Batch\_2\_final\M20.d  
Method MS\_fullscan\_positive.m  
Sample Name NaFormate  
Comment

Acquisition Date 8/22/2021 12:44:11 PM

Operator Demo User  
Instrument impact II 1825265.10235

Acquisition Parameter

|             |          |                      |          |                  |           |
|-------------|----------|----------------------|----------|------------------|-----------|
| Source Type | ESI      | Ion Polarity         | Positive | Set Nebulizer    | 2.0 Bar   |
| Focus       | Active   | Set Capillary        | 3500 V   | Set Dry Heater   | 250 °C    |
| Scan Begin  | 150 m/z  | Set End Plate Offset | -400 V   | Set Dry Gas      | 8.0 l/min |
| Scan End    | 1000 m/z | Set Charging Voltage | 2000 V   | Set Divert Valve | Waste     |
|             |          | Set Corona           | 4000 nA  | Set APCI Heater  | 200 °C    |

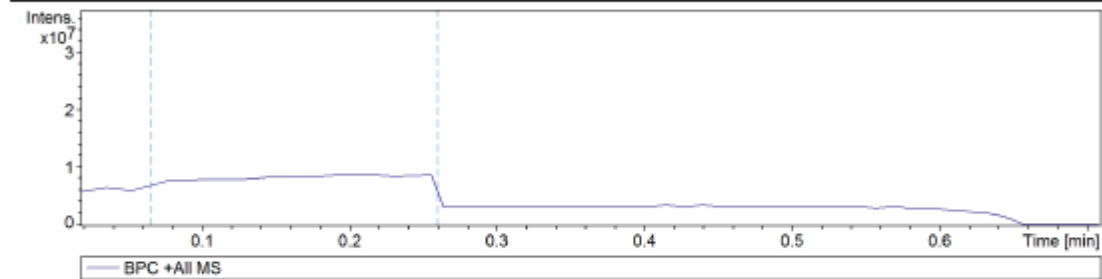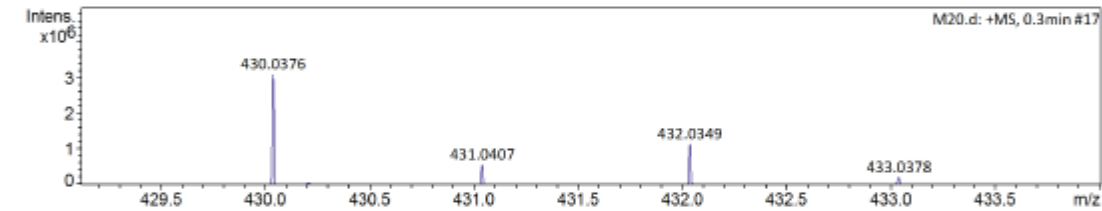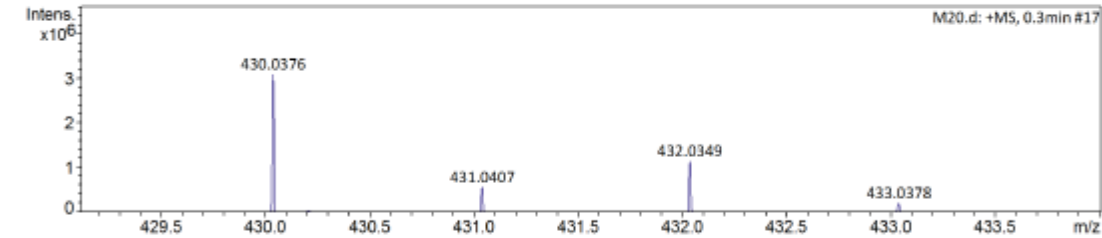

M20.d

Bruker Compass DataAnalysis 4.4

printed: 8/22/2021 6:38:00 PM

by: demo

Page 1 of 1

Compound 17

Display Report

Analysis Info

Analysis Name D:\Data\RawData\Azamat\KTH\Batch\_2\_final\M22.d  
Method MS\_fullscan\_positive.m  
Sample Name NaFormate  
Comment

Acquisition Date 8/22/2021 12:29:10 PM

Operator Demo User  
Instrument impact II 1825265.10235

Acquisition Parameter

|             |          |                      |          |                  |           |
|-------------|----------|----------------------|----------|------------------|-----------|
| Source Type | ESI      | Ion Polarity         | Positive | Set Nebulizer    | 2.0 Bar   |
| Focus       | Active   | Set Capillary        | 3500 V   | Set Dry Heater   | 250 °C    |
| Scan Begin  | 150 m/z  | Set End Plate Offset | -400 V   | Set Dry Gas      | 8.0 l/min |
| Scan End    | 1000 m/z | Set Charging Voltage | 2000 V   | Set Divert Valve | Waste     |
|             |          | Set Corona           | 4000 nA  | Set APCI Heater  | 200 °C    |

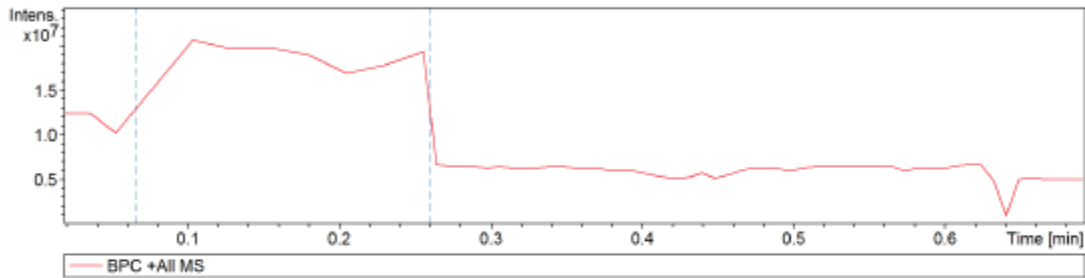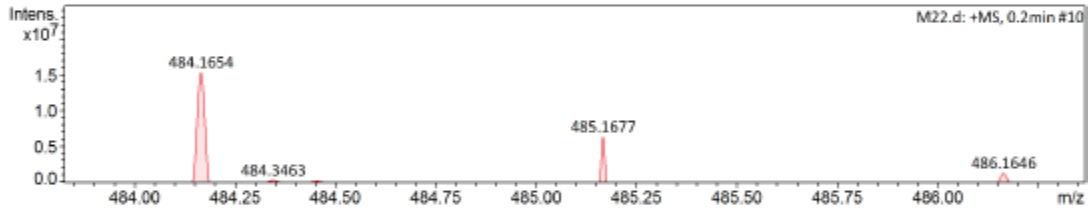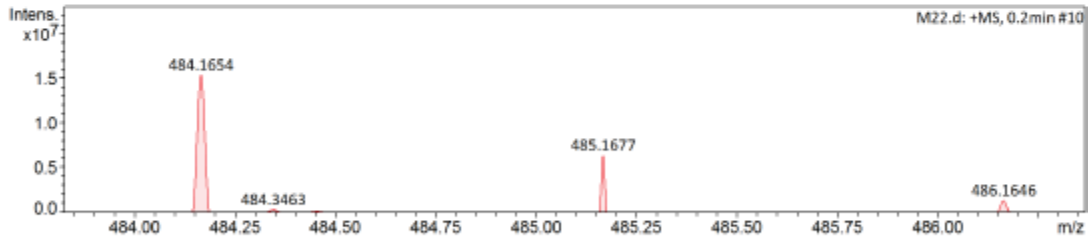

M22.d

Bruker Compass DataAnalysis 4.4

printed: 8/22/2021 6:40:12 PM

by: demo

Page 1 of 1

Compound 18

Display Report

Analysis Info

Analysis Name D:\Data\RawData\Azamat\KTH\Batch\_2\_final\M21.d  
Method MS\_fullscan\_positive.m  
Sample Name NaFormate  
Comment

Acquisition Date 8/22/2021 12:59:57 PM

Operator Demo User  
Instrument impact II 1825265.10235

Acquisition Parameter

|             |          |                      |          |                  |           |
|-------------|----------|----------------------|----------|------------------|-----------|
| Source Type | ESI      | Ion Polarity         | Positive | Set Nebulizer    | 2.0 Bar   |
| Focus       | Active   | Set Capillary        | 3500 V   | Set Dry Heater   | 250 °C    |
| Scan Begin  | 150 m/z  | Set End Plate Offset | -400 V   | Set Dry Gas      | 8.0 l/min |
| Scan End    | 1000 m/z | Set Charging Voltage | 2000 V   | Set Divert Valve | Waste     |
|             |          | Set Corona           | 4000 nA  | Set APCI Heater  | 200 °C    |

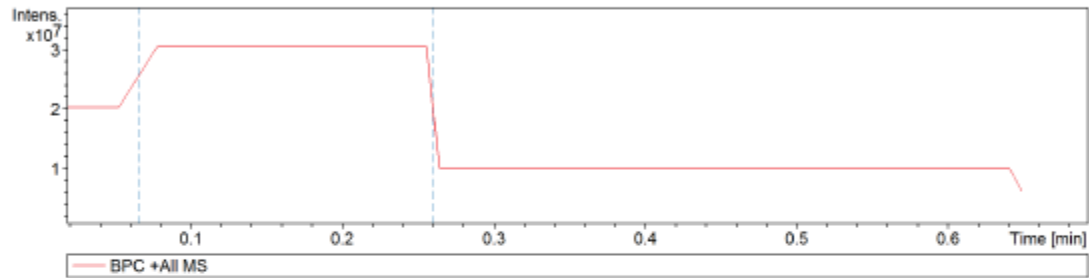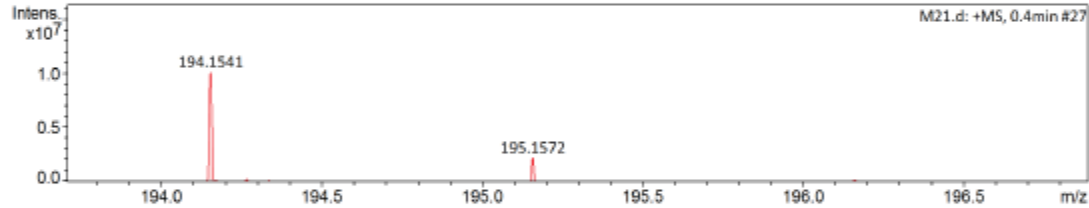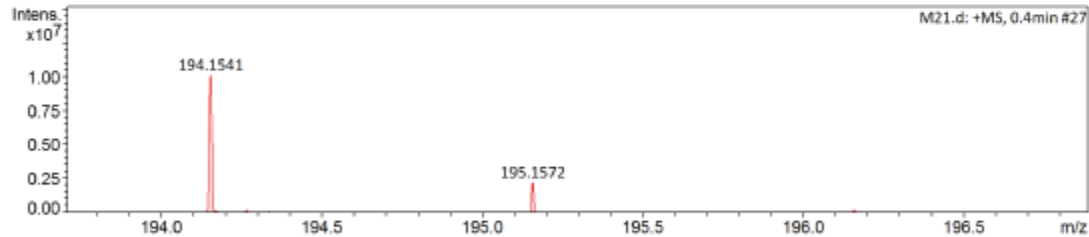

Supplement: jo1c02241_si_001.pdf [file jo1c02241_si_001.pdf]
